# Supplementary material for: Imino exchange reaction in a dearomatization strategy: synthesis of N-acyl diarylamines and phenothiazines from two anilines
Source: Royal Society of Chemistry journal article supplement (doi:10.1039/c4qo00201f), 2014-01-01

# **Imino Exchange Reaction in Dearomatization**

## **Strategy: Synthesis of *N*-Acyl Diarylamines and Phenothiazines from Two Anilines**

Li Zhang,<sup>a</sup> Huiqing Wang,<sup>b</sup> Bo Yang,<sup>\*,b</sup> and Renhua Fan<sup>\*,a</sup>

<sup>a</sup>Department of Chemistry, Fudan University, 220 Handan Road, Shanghai 200433, China. Fax: 86-21-6510-2412; Tel: 86-21-6564-2019; E-mail: rhfan@fudan.edu.cn

<sup>b</sup>Department of Urology, Changhai Hospital, 168 Changhai Road, Shanghai 200433, China. E-mail: yangbochanghai@126.com

### **Supporting Information**

1. General information (S2)
2. General experimental procedure and characterization data. (S2- S9)
3. Copies of <sup>1</sup>H, <sup>13</sup>C NMR of products (S10-S63)

## 1. General Information

All reactions were performed in Schlenk tubes under nitrogen atmosphere. Flash column chromatography was performed using silica gel (60-Å pore size, 32–63 μm, standard grade). Analytical thin-layer chromatography was performed using glass plates pre-coated with 0.25 mm 230–400 mesh silica gel impregnated with a fluorescent indicator (254 nm). Thin layer chromatography plates were visualized by exposure to ultraviolet light. Organic solutions were concentrated on rotary evaporators at ~20 Torr (house vacuum) at 25–35 °C. Commercial reagents and solvents were used as received. Nuclear magnetic resonance (NMR) spectra are recorded in parts per million from internal tetramethylsilane on the δ scale.

## 2. General Procedure and Spectral Data of Products

### 1) Synthesis of *N*-acyl diarylamines from anilines and aldehydes

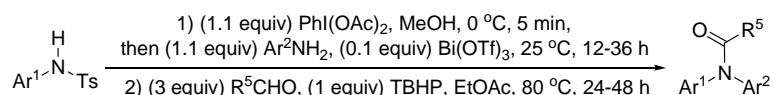

PhI(OAc)<sub>2</sub> (0.22 mmol) was added into the solution of *N*-sulfonyl protected *para*-substituted aniline (0.2 mmol) in MeOH (2 mL) at 0 °C. After 5 min, the second aniline (0.22 mmol) and Bi(OTf)<sub>3</sub> (0.02 mmol) were added. The reaction was stirred at 25 °C until the consumption of *N*-sulfonyl cyclohexadienimine determined by TLC, then was quenched with saturated NaHCO<sub>3</sub> (20 mL), and extracted by ethyl acetate (25 mL x 3). The organic layer was dried over anhydrous Na<sub>2</sub>SO<sub>4</sub>, and concentrated in vacuo. The crude product was treated EtOAc (2 mL), TBHP (0.2 mmol), and aldehyde (0.6 mmol). The resulting mixture was stirred at 80 °C until the consumption of *N*-aryl cyclohexadienimine determined by TLC. The reaction was quenched with saturated NaHCO<sub>3</sub> (20 mL), and extracted by ethyl acetate (25 mL x 3). The organic layer was dried over anhydrous Na<sub>2</sub>SO<sub>4</sub>, and concentrated in vacuo. The residue was purified by flash column chromatography on silica gel (hexanes/ethyl acetate = 10:1) to afford the pure product.

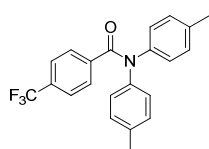

***N,N*-Di-*p*-tolyl-4-(trifluoromethyl)benzamide 3:** white solid; m.p. 126-127 °C;  $^1\text{H}$  NMR (400 MHz,  $\text{CDCl}_3$ )  $\delta$  7.55 (d,  $J = 8.1$  Hz, 2 H), 7.46 (d,  $J = 8.2$  Hz, 2 H), 6.85-7.18 (m, 8 H), 2.30 (s, 6 H);  $^{13}\text{C}$  NMR (100 MHz,  $\text{CDCl}_3$ )  $\delta$  169.0, 140.7, 139.9, 136.5, 131.6, 131.3, 129.8, 129.3, 124.8, 124.7, 122.3, 20.9; HRMS  $m/z$  calcd for  $\text{C}_{22}\text{H}_{19}\text{F}_3\text{NO}$  ( $[\text{M}+\text{H}]^+$ ): 370.1413, found 370.1412.

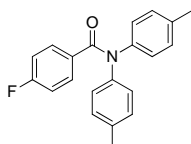

**4-Fluoro-*N,N*-di-*p*-tolylbenzamide 4:** brown solid; m.p. 165-166 °C;  $^1\text{H}$  NMR (400 MHz,  $\text{CDCl}_3$ )  $\delta$  7.42 - 7.48 (m, 2 H), 7.00 - 7.10 (m, 8 H), 8.85-6.90 (m, 2 H), 2.29 (s, 6 H);  $^{13}\text{C}$  NMR (100 MHz,  $\text{CDCl}_3$ )  $\delta$  169.4, 164.6, 162.1, 141.3, 136.1, 132.3, 131.5, 131.4, 129.7, 127.0, 20.9; HRMS  $m/z$  calcd for  $\text{C}_{21}\text{H}_{19}\text{FNO}$  ( $[\text{M}+\text{H}]^+$ ): 320.1445, found 320.1439.

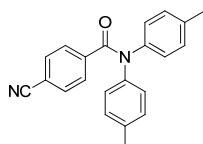

**4-Cyano-*N,N*-di-*p*-tolylbenzamide 5:** white solid; m.p. 180-181 °C;  $^1\text{H}$  NMR (400 MHz,  $\text{CDCl}_3$ )  $\delta$  7.53 (d,  $J = 8.5$  Hz, 2 H), 7.49 (d,  $J = 8.5$  Hz, 2 H), 6.82-7.12 (m, 8 H), 2.30 (s, 6H);  $^{13}\text{C}$  NMR (100 MHz,  $\text{CDCl}_3$ )  $\delta$  168.6, 140.9, 140.5, 136.8, 131.8, 130.0, 129.2, 127.1, 118.2, 113.4, 21.0; HRMS  $m/z$  calcd for  $\text{C}_{22}\text{H}_{19}\text{N}_2\text{O}$  ( $[\text{M}+\text{H}]^+$ ): 327.1492, found 327.1501.

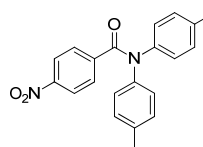

**4-Nitro-*N,N*-di-*p*-tolylbenzamide 6:** brown solid; m.p. 146-147 °C;  $^1\text{H}$  NMR (400 MHz,  $\text{CDCl}_3$ )  $\delta$  8.06 (d,  $J = 8.7$  Hz, 2 H), 7.59 (d,  $J = 8.8$  Hz, 2 H), 6.75-7.27 (m, 8 H), 2.31 (s, 6 H);  $^{13}\text{C}$  NMR (100 MHz,  $\text{CDCl}_3$ )  $\delta$  168.3, 148.1, 142.7, 140.4, 137.0, 130.0, 129.8, 127.2, 123.2, 21.0; HRMS  $m/z$  calcd for  $\text{C}_{21}\text{H}_{19}\text{N}_2\text{O}_3$  ( $[\text{M}+\text{H}]^+$ ): 347.1390, found 347.1389.

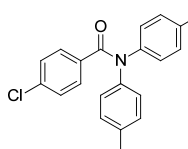

**4-Chloro-*N,N*-di-*p*-tolylbenzamide 7:** white solid; m.p. 139-140 °C;  $^1\text{H}$  NMR (400 MHz,  $\text{CDCl}_3$ )  $\delta$  7.39 (d,  $J = 8.5$  Hz, 2 H), 7.17 (d,  $J = 8.5$  Hz, 2 H), 6.90 -7.12 (m, 8 H), 2.29 (s, 6 H);  $^{13}\text{C}$  NMR (100 MHz,  $\text{CDCl}_3$ )  $\delta$  169.3, 141.1, 136.2, 135.9, 134.6, 130.5, 129.7, 128.0, 127.0, 20.9; HRMS  $m/z$  calcd for  $\text{C}_{21}\text{H}_{19}\text{ClNO}$  ( $[\text{M}+\text{H}]^+$ ): 336.1150, found 336.1162

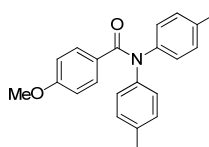

**4-Methoxy-*N,N*-di-*p*-tolylbenzamide 8:** white solid; m.p. 131-132 °C;  $^1\text{H}$  NMR (400 MHz,  $\text{CDCl}_3$ )  $\delta$  7.43 (d,  $J = 8.9$  Hz, 2 H), 6.98-7.10 (m, 8 H), 6.70 (d,  $J = 8.9$  Hz, 2 H), 3.75 (s, 3 H), 2.30 (s, 6 H);  $^{13}\text{C}$  NMR (100 MHz,  $\text{CDCl}_3$ )  $\delta$  170.3, 160.9, 141.9, 135.8,

131.4, 129.7, 128.3, 127.2, 55.2, 21.0; HRMS  $m/z$  calcd for  $C_{22}H_{22}NO_2$  ( $[M+H]^+$ ): 332.1645, found 332.1648.

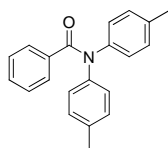

***N,N*-Di-*p*-tolylbenzamide 9:** yellow solid; m.p. 136-137 °C;  $^1H$  NMR (400 MHz,  $CDCl_3$ )  $\delta$  7.45 (d,  $J = 7.2$  Hz, 2 H), 7.16 -7.27 (m, 3 H), 6.92-7.10 (m, 8 H), 2.28 (s, 6 H);  $^{13}C$  NMR (100 MHz,  $CDCl_3$ )  $\delta$  170.6, 141.5, 136.4, 136.1, 130.0, 129.7, 129.2, 127.8, 127.2, 21.0; HRMS  $m/z$  calcd for  $C_{21}H_{20}NO$  ( $[M+H]^+$ ): 302.1539, found 302.1540.

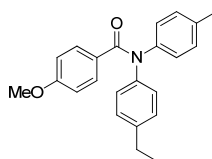

***N*-(4-Ethylphenyl)-4-methoxy-*N*-(*p*-tolyl)benzamide 11:** brown solid; m.p. 124-125 °C;  $^1H$  NMR (400 MHz,  $CDCl_3$ )  $\delta$  7.41-7.45 (m, 2 H), 6.97 -7.13 (m, 8 H), 6.67-6.74 (m, 2 H), 3.75 (s, 3 H), 2.62 (t,  $J = 15.2$  Hz,  $J = 7.6$  Hz, 2 H), 2.29 (s, 3 H), 1.20 (t,  $J = 7.6$  Hz, 3 H);  $^{13}C$  NMR (100 MHz,  $CDCl_3$ )  $\delta$  170.1, 160.8, 142.0, 141.9, 141.8, 135.7, 131.3, 129.6, 128.4, 128.2, 127.1, 127.1, 112.8, 55.1, 28.2, 20.9, 15.3; HRMS  $m/z$  calcd for  $C_{23}H_{24}NO_2$  ( $[M+H]^+$ ): 346.1802, found 346.1797.

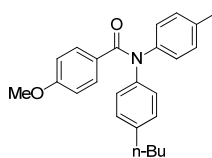

***N*-(4-Butylphenyl)-4-methoxy-*N*-(*p*-tolyl)benzamide 12:** yellow solid; m.p. 94-95 °C;  $^1H$  NMR (400 MHz,  $CDCl_3$ )  $\delta$  7.42 (d,  $J = 8.8$  Hz, 2 H), 6.96 -7.10 (m, 8 H), 6.68 (d,  $J = 8.8$  Hz, 2 H), 3.72 (s, 3 H), 2.55 (t,  $J = 7.6$  Hz, 2 H), 2.28 (s, 3 H), 1.52-1.59 (m, 2 H), 1.27-1.36 (m, 2 H), 0.90 (t,  $J = 7.3$  Hz, 3 H);  $^{13}C$  NMR (100 MHz,  $CDCl_3$ )  $\delta$  170.0, 160.7, 141.8, 141.7, 140.6, 135.6, 131.2, 129.6, 128.8, 128.1, 127.0, 126.9, 112.8, 55.0, 35.0, 33.3, 22.2, 20.9, 13.8; HRMS  $m/z$  calcd for  $C_{25}H_{28}NO_2$  ( $[M+H]^+$ ): 374.2115, found 374.2133.

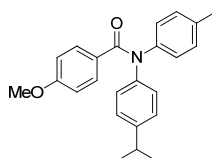

***N*-(4-Isopropylphenyl)-4-methoxy-*N*-(*p*-tolyl)benzamide 13:** yellow solid; m.p. 124-125 °C;  $^1H$  NMR (400 MHz,  $CDCl_3$ )  $\delta$  7.42 (d,  $J = 8.8$  Hz, 2 H), 6.96-7.15 (m, 8 H), 6.69 (d,  $J = 8.8$  Hz, 2 H), 3.74 (s, 3 H), 2.82-2.89 (m, 1 H), 2.29 (s, 3 H), 1.21 (d,  $J = 6.9$  Hz, 6 H);  $^{13}C$  NMR (100 MHz,  $CDCl_3$ )  $\delta$  170.1, 160.8, 146.5, 141.9, 141.8, 135.7, 131.2, 129.6, 128.2, 127.2, 126.9, 126.8, 112.9, 55.1, 33.5, 23.8, 20.9; HRMS  $m/z$  calcd for  $C_{24}H_{26}NO_2$  ( $[M+H]^+$ ): 360.1958, found 360.1950.

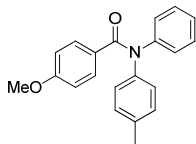

**4-Methoxy-N-phenyl-N-(p-tolyl)benzamide 14:** white solid; m.p. 151-152 °C;  $^1\text{H}$  NMR (400 MHz,  $\text{CDCl}_3$ )  $\delta$  7.43 (d,  $J = 8.8$  Hz, 2 H), 7.24 -7.30 (m, 2 H), 7.05-7.18 (m, 5 H), 7.15 (d,  $J = 8.3$  Hz, 2 H), 6.70 (d,  $J = 8.8$  Hz, 2 H), 3.75 (s, 3 H), 2.30 (s, 3H);  $^{13}\text{C}$  NMR (100 MHz,  $\text{CDCl}_3$ )  $\delta$  170.3, 161.0, 144.5, 141.8, 136.0, 131.4, 129.8, 129.1, 128.2, 127.3, 126.0, 113.1, 55.2, 21.0; HRMS  $m/z$  calcd for  $\text{C}_{21}\text{H}_{20}\text{NO}_2$  ( $[\text{M}+\text{H}]^+$ ): 318.1489, found 318.1484.

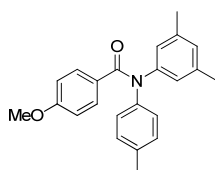

**N-(3,5-Dimethylphenyl)-4-methoxy-N-(p-tolyl)benzamide 15;** white solid; m.p. 143-144 °C;  $^1\text{H}$  NMR (400 MHz,  $\text{CDCl}_3$ )  $\delta$  7.43 (d,  $J = 8.8$  Hz, 2 H), 7.06 (d,  $J = 8.2$  Hz, 2 H), 6.99 (d,  $J = 8.2$  Hz, 2 H), 6.81 (s, 1 H), 6.77 (s, 2 H), 6.70 (d,  $J = 8.8$  Hz, 2 H), 3.75 (s, 3 H), 2.29 (s, 3H), 2.22 (s, 6 H);  $^{13}\text{C}$  NMR (100 MHz,  $\text{CDCl}_3$ )  $\delta$  170.3, 161.0, 144.2, 142.0, 138.7, 135.8, 131.4, 129.8, 128.4, 128.0, 127.2, 125.1, 113.0, 55.2, 21.2, 21.0; HRMS  $m/z$  calcd for  $\text{C}_{23}\text{H}_{24}\text{NO}_2$  ( $[\text{M}+\text{H}]^+$ ): 346.1802, found 346.1787.

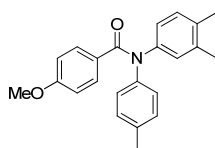

**N-(3,4-Dimethylphenyl)-4-methoxy-N-(p-tolyl)benzamide 16:** yellow solid; m.p. 140-141 °C;  $^1\text{H}$  NMR (400 MHz,  $\text{CDCl}_3$ )  $\delta$  7.41-7.46 (m, 2 H), 6.98-7.10 (m, 7 H), 6.64 - 6.72 (m, 2 H), 3.74 (s, 3 H), 2.29 (s, 3 H), 2.20 (s, 3 H), 2.16 (s, 3 H);  $^{13}\text{C}$  NMR (100 MHz,  $\text{CDCl}_3$ )  $\delta$  170.2, 160.8, 142.0, 141.9, 140.2, 137.3, 135.6, 134.6, 131.2, 130.0, 129.6, 128.2, 127.0, 124.7, 55.1, 20.9, 19.8, 19.2; HRMS  $m/z$  calcd for  $\text{C}_{23}\text{H}_{24}\text{NO}_2$  ( $[\text{M}+\text{H}]^+$ ): 346.1802, found 346.1798.

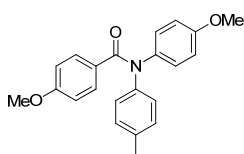

**4-Methoxy-N-(4-methoxyphenyl)-N-(p-tolyl)benzamide 17:** white solid; m.p. 112-113 °C;  $^1\text{H}$  NMR (400 MHz,  $\text{CDCl}_3$ )  $\delta$  7.42 (d,  $J = 8.7$  Hz, 2 H), 6.96 - 7.10 (m, 6 H), 6.80 (d,  $J = 8.8$  Hz, 2 H), 6.70 (d,  $J = 8.8$  Hz, 2 H), 3.76 (s, 3 H), 3.75 (s, 3 H), 2.29 (s, 3 H);  $^{13}\text{C}$  NMR (100 MHz,  $\text{CDCl}_3$ )  $\delta$  170.3, 160.9, 157.6, 142.0, 137.4, 135.8, 131.3, 129.7, 128.5, 128.3, 127.0, 114.4, 113.1, 55.2, 55.3, 21.0; HRMS  $m/z$  calcd for  $\text{C}_{22}\text{H}_{22}\text{NO}_3$  ( $[\text{M}+\text{H}]^+$ ): 348.1594, found 348.1593.

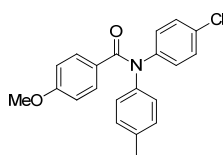

**N-(4-chlorophenyl)-4-methoxy-N-(p-tolyl)benzamide 18:** yellow solid; m.p. 127-128 °C;  $^1\text{H}$  NMR (400 MHz,  $\text{CDCl}_3$ )  $\delta$  7.42 (d,  $J = 8.9$  Hz, 2 H), 7.24 (d,  $J = 8.7$  Hz, 2 H), 7.02-7.12 (m, 4 H), 6.98 (d,  $J = 8.3$  Hz, 2 H), 6.72 (d,  $J = 8.8$  Hz, 2 H), 3.77 (s, 3 H), 2.30 (s, 3

H);  $^{13}\text{C}$  NMR (100 MHz,  $\text{CDCl}_3$ )  $\delta$  170.1, 161.1, 142.9, 141.4, 136.3, 131.3, 129.9, 129.1, 128.2, 127.7, 127.3, 113.1, 55.2, 20.9; HRMS  $m/z$  calcd for  $\text{C}_{21}\text{H}_{19}\text{ClNO}_2$  ( $[\text{M}+\text{H}]^+$ ): 352.1099, found 352.1108.

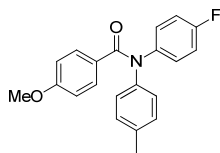

***N*-(4-Fluorophenyl)-4-methoxy-*N*-(*p*-tolyl)benzamide 19:** yellow solid; m.p. 151-152 °C;  $^1\text{H}$  NMR (400 MHz,  $\text{CDCl}_3$ )  $\delta$  7.42 (d,  $J$  = 8.8 Hz, 2 H), 6.94 -7.15 (m, 8 H), 6.71 (d,  $J$  = 8.8 Hz, 2 H), 3.76 (s, 3 H), 2.30 (s, 3 H);  $^{13}\text{C}$  NMR (100 MHz,  $\text{CDCl}_3$ )  $\delta$  170.2, 161.7, 161.0, 159.2, 141.6, 140.4, 136.1, 131.3, 129.8, 128.7, 128.6, 127.8, 127.1, 116.0, 115.7, 113.1, 55.2, 20.9; HRMS  $m/z$  calcd for  $\text{C}_{21}\text{H}_{19}\text{FNO}_2$  ( $[\text{M}+\text{H}]^+$ ): 336.1394, found 336.1389.

## 2) Synthesis of phenothiazines

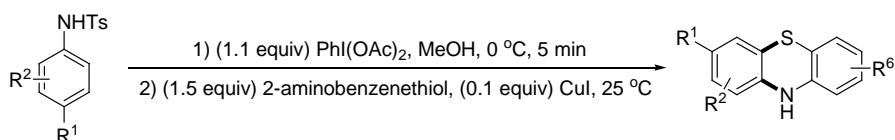

$\text{PhI}(\text{OAc})_2$  (0.22 mmol) was added into the solution of *N*-sulfonyl protected *para*-substituted aniline (0.2 mmol) in MeOH (2 mL) in ice-water bath. After 5 minutes, 2-aminobenzenethiol (0.30 mmol) and CuI (0.02 mmol) were added into the reaction system. Upon completion determined by TLC, the reaction mixture was quenched with saturated  $\text{NaHCO}_3$  (25 mL), and extracted by ethyl acetate (25 mL x 3). The organic layer was dried over  $\text{Na}_2\text{SO}_4$ , and concentrated under vacuum. The residue was purified by flash column chromatography on silica gel (hexanes/ethyl acetate = 20:1) to afford the pure product.

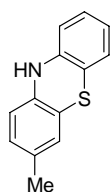

**3-Methyl-10*H*-phenothiazine 23:**  $^1\text{H}$  NMR (400 MHz, DMSO- $d_6$ )  $\delta$  8.46 (s, 1 H), 6.96 (t,  $J$  = 7.6 Hz, 1 H), 6.89 (d,  $J$  = 7.5 Hz, 1 H), 6.78 (d,  $J$  = 7.9 Hz, 1 H), 6.70-6.73 (m, 2 H), 6.67 (d,  $J$  = 7.9 Hz, 1 H), 6.59 (d,  $J$  = 8.0 Hz, 1 H), 2.12 (s, 3 H);  $^{13}\text{C}$  NMR (100 MHz, DMSO- $d_6$ )  $\delta$  142.9, 140.0, 131.1, 128.4, 127.9, 127.0, 126.7, 121.9, 116.8, 116.7, 114.8, 20.4; HRMS  $m/z$  calcd for  $\text{C}_{13}\text{H}_{12}\text{NS}$  ( $[\text{M}+\text{H}]^+$ ): 214.0685, found 214.0669.

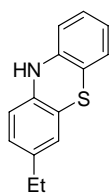

**3-Ethyl-10H-phenothiazine 24:**  $^1\text{H}$  NMR (400 MHz, DMSO- $d_6$ )  $\delta$  8.47 (s, 1 H), 6.97 (dt,  $J = 7.7, 1.4$  Hz, 1 H), 6.89 (dd,  $J = 7.6, 1.2$  Hz, 1 H), 6.81 (dd,  $J = 8.1, 1.9$  Hz, 1 H), 6.75 (dd,  $J = 1.7$  Hz, 1 H), 6.72 (dt,  $J = 7.6, 1.2$  Hz, 1 H), 6.67 (dd,  $J = 7.9, 1.1$  Hz, 1 H), 6.61 (d,  $J = 8.0$  Hz, 1 H), 2.39-2.44 (m, 2 H), 1.09 (t,  $J = 7.6$  Hz, 3 H);  $^{13}\text{C}$  NMR (100 MHz, DMSO- $d_6$ )  $\delta$  142.9, 140.3, 137.8, 127.9, 127.3, 126.7, 125.9, 121.9, 116.8, 116.7, 114.8, 114.7, 27.7, 16.2; HRMS  $m/z$  calcd for  $\text{C}_{14}\text{H}_{14}\text{NS}$  ( $[\text{M}+\text{H}]^+$ ): 228.0841, found 228.0852.

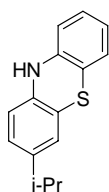

**3-Isopropyl-10H-phenothiazine 25:**  $^1\text{H}$  NMR (400 MHz, DMSO- $d_6$ )  $\delta$  8.48 (s, 1 H), 6.96 (t,  $J = 7.6$  Hz, 1 H), 6.89 (d,  $J = 7.6$  Hz, 1 H), 6.85 (dd,  $J = 8.1, 1.8$  Hz, 1 H), 6.77 (d,  $J = 1.7$  Hz, 1 H), 6.72 (dd,  $J = 10.8, 4.2$  Hz, 1 H), 6.67 (d,  $J = 7.3$  Hz, 1 H), 6.62 (d,  $J = 8.1$  Hz, 1 H), 2.70 (m, 1 H), 1.12 (s, 3 H), 1.10 (s, 3 H);  $^{13}\text{C}$  NMR (100 MHz, DMSO- $d_6$ )  $\delta$  142.9, 142.5, 140.4, 127.9, 126.7, 125.8, 124.4, 121.9, 116.8, 116.7, 114.8, 114.7, 33.0, 24.3; HRMS  $m/z$  calcd for  $\text{C}_{15}\text{H}_{16}\text{NS}$  ( $[\text{M}+\text{H}]^+$ ): 242.0998, found 242.0987.

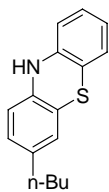

**3-Butyl-10H-phenothiazine 26:**  $^1\text{H}$  NMR (400 MHz, DMSO- $d_6$ )  $\delta$  8.48 (s, 1 H), 6.96 (t,  $J = 7.6$  Hz, 1 H), 6.89 (d,  $J = 6.9$  Hz, 1 H), 6.79 (dd,  $J = 8.0, 1.3$  Hz, 1 H), 6.72 (s, 2 H), 6.67 (d,  $J = 7.8$  Hz, 1 H), 6.60 (d,  $J = 7.9$  Hz, 1 H), 2.38 (s, 2 H), 1.49-1.39 (m, 2 H), 1.24 (m, 2 H), 0.86 (t,  $J = 7.3$  Hz, 3 H);  $^{13}\text{C}$  NMR (100 MHz, DMSO- $d_6$ )  $\delta$  142.8, 140.3, 136.3, 127.9, 127.8, 126.7, 126.3, 121.9, 116.8, 116.7, 114.8, 34.3, 33.6, 22.1, 14.3; HRMS  $m/z$  calcd for  $\text{C}_{16}\text{H}_{18}\text{NS}$  ( $[\text{M}+\text{H}]^+$ ): 256.1154, found 256.1151.

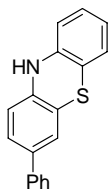

**3-Phenyl-10H-phenothiazine 27:**  $^1\text{H}$  NMR (400 MHz, DMSO- $d_6$ )  $\delta$  8.72 (s, 1 H), 7.56 (d,  $J = 7.4$  Hz, 2 H), 7.39 (t,  $J = 7.6$  Hz, 2 H), 7.34-7.24 (m, 2 H), 7.22 (s, 1 H), 7.00 (t,  $J = 7.4$  Hz, 1 H), 6.93 (d,  $J = 7.4$  Hz, 1 H), 6.74-6.77 (m, 2 H), 6.70 (d,  $J = 7.8$  Hz, 1 H);  $^{13}\text{C}$  NMR (100 MHz, DMSO- $d_6$ )  $\delta$  142.2, 141.9, 139.6, 134.2, 129.3, 128.1, 127.3, 126.7, 126.3, 126.2, 124.6, 122.3, 117.5, 116.6, 115.2, 115.0; HRMS  $m/z$  calcd for  $\text{C}_{18}\text{H}_{14}\text{NS}$  ( $[\text{M}+\text{H}]^+$ ): 276.0841, found 276.0824.

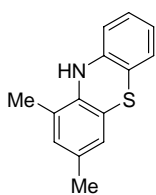

**1,3-Dimethyl-10H-phenothiazine 28:**  $^1\text{H}$  NMR (400 MHz, DMSO- $d_6$ )  $\delta$  7.54 (s, 1 H), 7.02-6.94 (m, 2 H), 6.90 (d,  $J = 7.3$  Hz, 1 H), 6.74 (dt,  $J = 7.7, 1.8$  Hz, 1 H), 6.68 (s, 1 H), 6.60 (s, 1 H), 2.16 (s, 3 H), 2.09 (s, 3 H);  $^{13}\text{C}$  NMR (100 MHz, DMSO- $d_6$ )  $\delta$  142.9, 138.0, 130.8, 130.3, 127.7, 126.5, 124.9, 122.7, 122.2, 117.6, 116.9, 116.0, 20.3, 18.0; HRMS  $m/z$  calcd for  $\text{C}_{14}\text{H}_{14}\text{NS}$  ( $[\text{M}+\text{H}]^+$ ): 228.0841, found 228.0813.

**2,3-Dimethyl-10H-phenothiazine** and

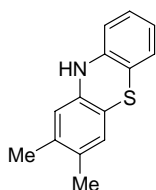

**3,4-dimethyl-10H-phenothiazine 29:**  $^1\text{H}$  NMR (400 MHz, DMSO- $d_6$ ): **I:**  $\delta$  8.37 (s, 1 H, NH, peaks of two isomers overlapped), 6.95 (dt,  $J = 7.8, 1.3$  Hz, 1 H, CHar, peaks of two isomers overlapped), 6.88 (d,  $J = 7.6$  Hz, 1 H, CHar), 6.71 (d,  $J = 7.4$  Hz, 1 H, CHar), 6.65-6.68 (m, 2 H, CHar, peaks of two isomers overlapped), 6.48 (s, 1 H, CHar), 2.07 (s, 3 H, CH), 2.04 (s, 3 H, CH); **II:**  $\delta$  8.37 (s, 1 H, NH, peaks of two isomers overlapped), 6.95 (dt,  $J = 7.8, 1.3$  Hz, 2 H, CHar, peaks of two isomers overlapped), 6.76 (d,  $J = 8.0$  Hz, 1 H, CHar), 6.65-6.68 (m, 2 H, CHar, peaks of two isomers overlapped), 6.44 (d,  $J = 7.9$  Hz, 1H, CHar), (s, 6 H, CH); HRMS  $m/z$  calcd for  $\text{C}_{14}\text{H}_{14}\text{NS}$  ( $[\text{M}+\text{H}]^+$ ): 228.0841, found 228.0832.

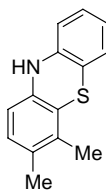

**3,7-dimethyl-10H-phenothiazine 30:** gray oil;  $^1\text{H}$  NMR (400 MHz, DMSO- $d_6$ )  $\delta$  8.31 (s, 1 H), 6.76 (d,  $J = 8.1$  Hz, 2 H), 6.72 (s, 2 H), 6.56 (d,  $J = 8.0$  Hz, 2 H), 2.11 (s, 6 H);  $^{13}\text{C}$  NMR (100 MHz, DMSO- $d_6$ )  $\delta$  140.3, 130.8, 128.3, 126.9, 116.6, 114.6, 20.4; HRMS  $m/z$  calcd for  $\text{C}_{14}\text{H}_{14}\text{NS}$  ( $[\text{M}+\text{H}]^+$ ): 228.0841, found 228.0816.

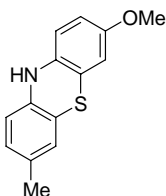

**3-Methoxy-7-methyl-10H-phenothiazine 31:**  $^1\text{H}$  NMR (400 MHz, DMSO- $d_6$ )  $\delta$  8.23 (s, 1 H), 6.77 (dd,  $J = 8.0, 1.2$  Hz, 1 H), 6.73 (s, 1H), 6.61 (s, 1 H), 6.60 (d,  $J = 2.6$  Hz, 1 H), 6.57-6.56 (m, 2 H), 3.64 (s, 3 H), 2.12 (s, 3 H);  $^{13}\text{C}$  NMR (100 MHz, DMSO- $d_6$ )  $\delta$  154.9, 140.7, 136.4, 130.6, 128.4, 126.9, 118.0, 116.1, 115.4, 114.6, 113.5, 112.1, 55.8, 20.4; HRMS  $m/z$  calcd for  $\text{C}_{14}\text{H}_{14}\text{NOS}$  ( $[\text{M}+\text{H}]^+$ ): 244.0791, found 244.0779.

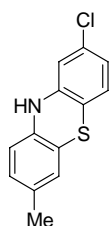

**2-Chloro-7-methyl-10H-phenothiazine 32:** pale yellow solid; m.p. 229-231  $^{\circ}\text{C}$ ;  $^1\text{H}$  NMR (400 MHz, DMSO- $d_6$ )  $\delta$  8.64 (s, 1 H), 6.89 (d,  $J = 8.2$  Hz, 1 H), 6.80 (d,  $J = 8.0$  Hz, 1 H), 6.75-6.73 (m, 2 H), 6.67 (d,  $J$



= 2.1 Hz, 1 H), 6.56 (d,  $J = 8.0$  Hz, 1 H), 2.12 (s, 3 H);  $^{13}\text{C}$  NMR (100 MHz, DMSO- $d_6$ )  $\delta$  144.2, 139.0, 132.2, 131.8, 128.6, 127.9, 127.0, 121.3, 116.4, 115.9, 115.0, 114.0, 20.4; HRMS  $m/z$  calcd for  $\text{C}_{13}\text{H}_{11}\text{ClNS}$  ( $[\text{M}+\text{H}]^+$ ): 248.0295, found 248.0264.

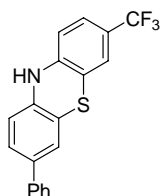

**3-Phenyl-7-(trifluoromethyl)-10H-phenothiazine 33:** pale yellow solid; m.p. 226-228 °C;  $^1\text{H}$  NMR (400 MHz, DMSO- $d_6$ )  $\delta$  8.99 (s, 1 H), 7.56 (d,  $J = 7.5$  Hz, 2 H), 7.39 (t,  $J = 7.6$  Hz, 2 H), 7.35-7.25 (m, 2 H), 7.23 (d,  $J = 1.6$  Hz, 1 H), 7.11 (d,  $J = 8.0$  Hz, 1 H), 7.03 (d,  $J = 8.0$  Hz, 1 H), 6.92 (s, 1 H), 6.73 (d,  $J = 8.2$  Hz, 1 H);  $^{13}\text{C}$  NMR (100 MHz, DMSO- $d_6$ )  $\delta$  142.7, 140.6, 139.4, 135.0, 129.3, 128.6 ( $J = 31.8$  Hz), 127.4 ( $J = 6.9$  Hz), 126.8, 126.3, 124.8, 124.5 ( $J = 271.8$  Hz), 122.3, 118.5 ( $J = 3.4$  Hz), 116.6, 115.5, 110.6 ( $J = 3.4$  Hz); HRMS  $m/z$  calcd for  $\text{C}_{19}\text{H}_{13}\text{F}_3\text{NS}$  ( $[\text{M}+\text{H}]^+$ ): 344.0715, found 344.0689.

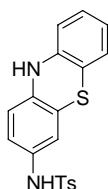

**4-Methyl-N-(10H-phenothiazin-3-yl)benzenesulfonamide 35:** black solid; m.p. 168-170 °C;  $^1\text{H}$  NMR (400 MHz, DMSO- $d_6$ )  $\delta$  9.82 (s, 1 H), 8.53 (s, 1 H), 7.58 (d,  $J = 8.2$  Hz, 2 H), 7.33 (d,  $J = 8.1$  Hz, 2 H), 6.96 (t,  $J = 7.6$  Hz, 1 H), 6.87 (d,  $J = 7.3$  Hz, 1 H), 6.68-6.74 (m, 2 H), 6.64 (d,  $J = 7.8$  Hz, 1 H), 6.60 (d,  $J = 2.1$  Hz, 1 H), 6.53 (d,  $J = 8.5$  Hz, 1 H), 2.33 (s, 3 H);  $^{13}\text{C}$  NMR (100 MHz, DMSO- $d_6$ )  $\delta$  143.6, 142.5, 139.6, 137.0, 132.1, 130.1, 128.2, 127.2, 126.7, 122.3, 121.5, 119.9, 117.4, 116.0, 115.1, 114.9, 21.5; HRMS  $m/z$  calcd for  $\text{C}_{19}\text{H}_{17}\text{N}_2\text{O}_2\text{S}_2$  ( $[\text{M}+\text{H}]^+$ ): 369.0726, found 369.0692.

zhangli  
z-992H

7.5637  
7.5434  
7.4738  
7.4532  
7.0783  
7.0404

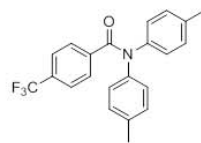

3

2.2968

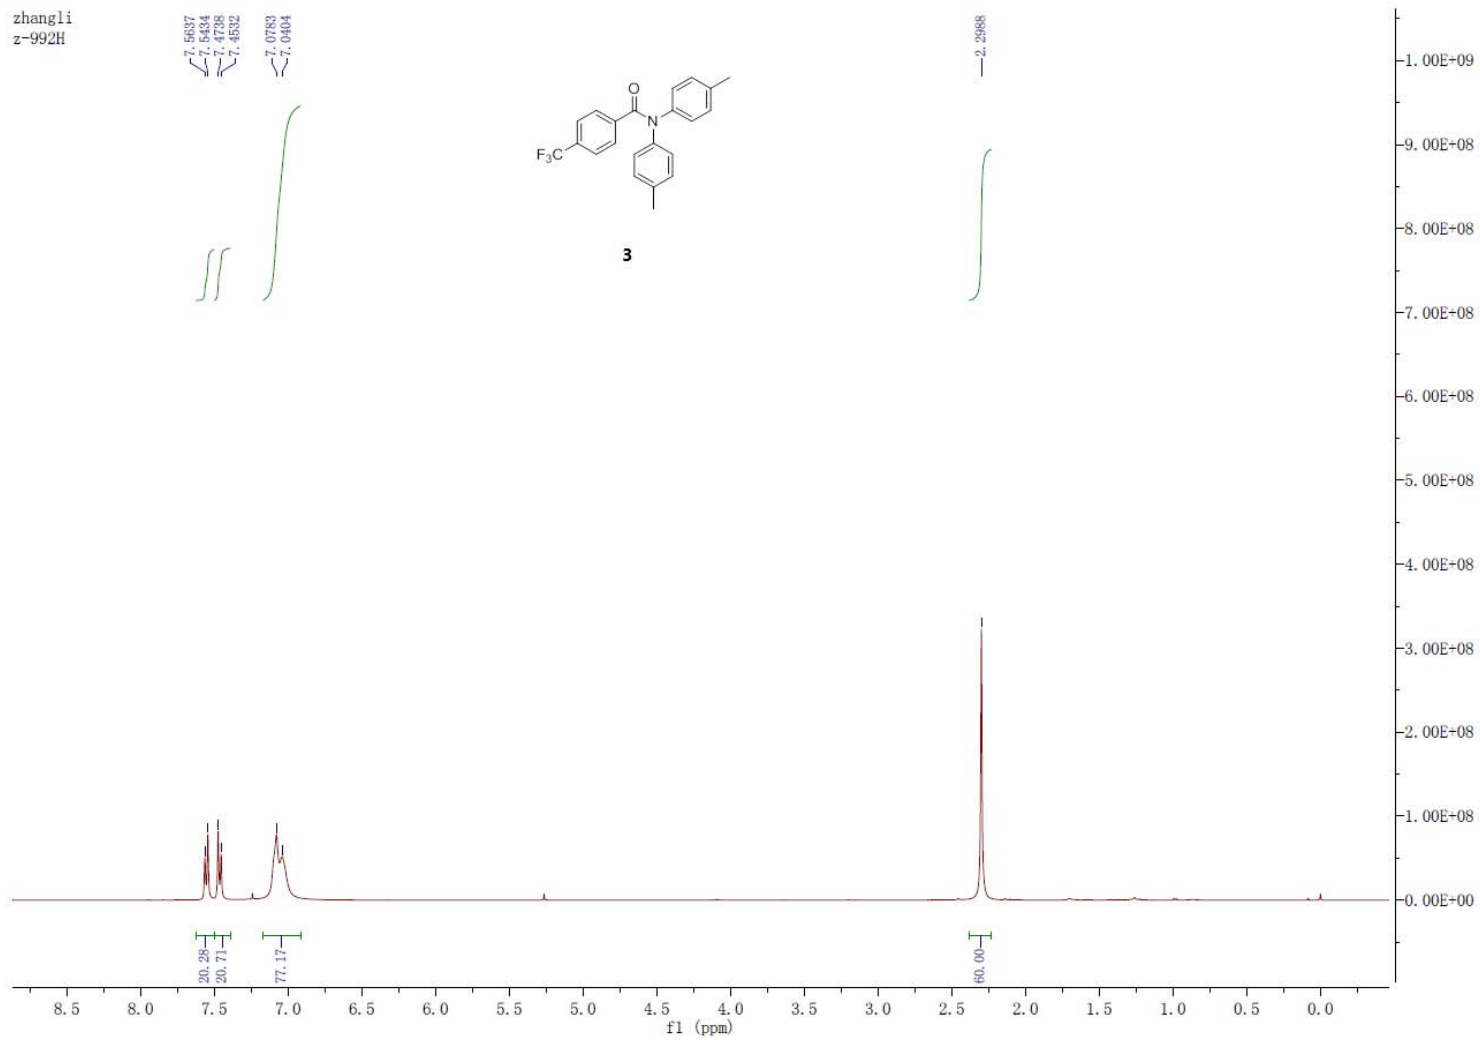

待整理核磁  
z-992

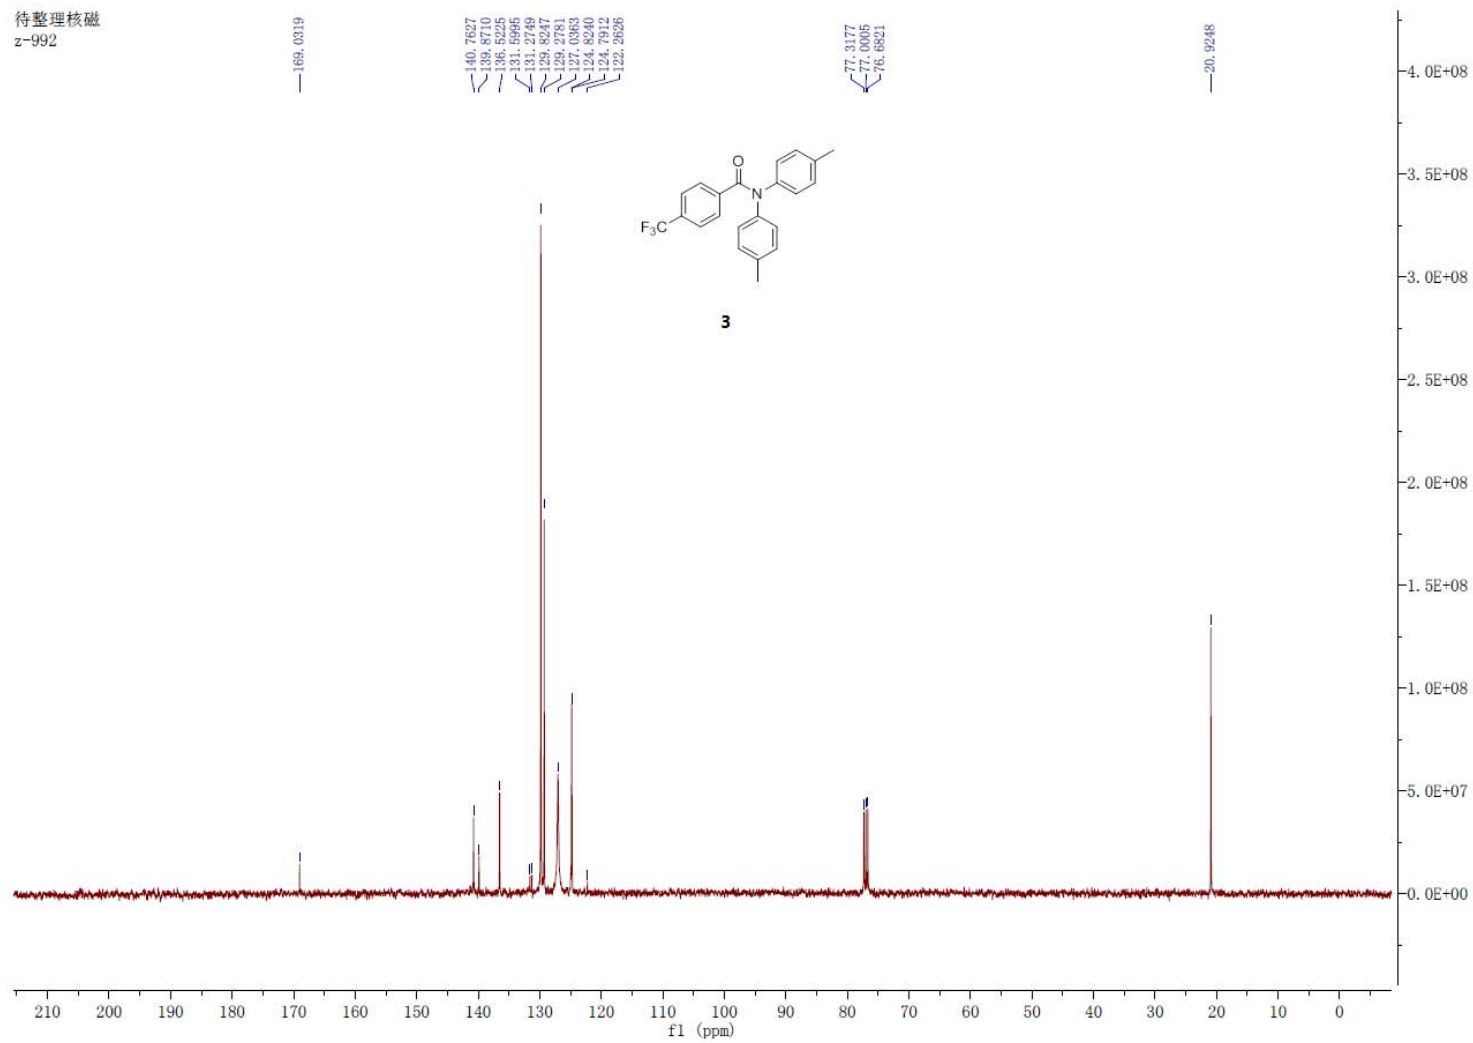

zhangli  
z-989H

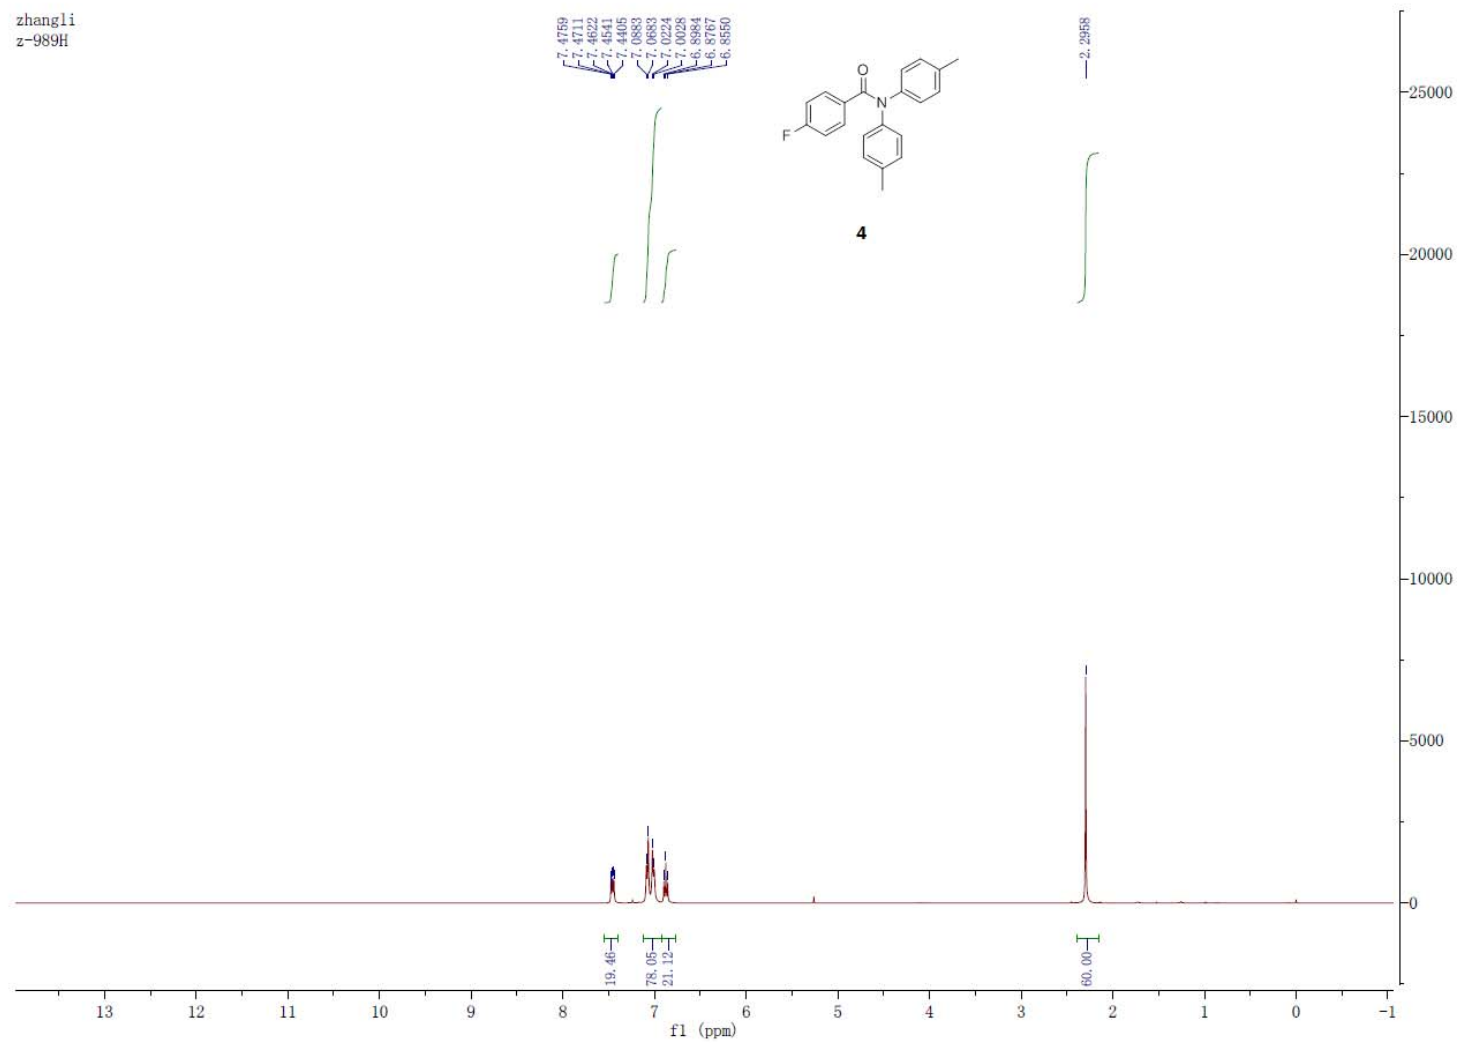

待整理核磁  
z-989C

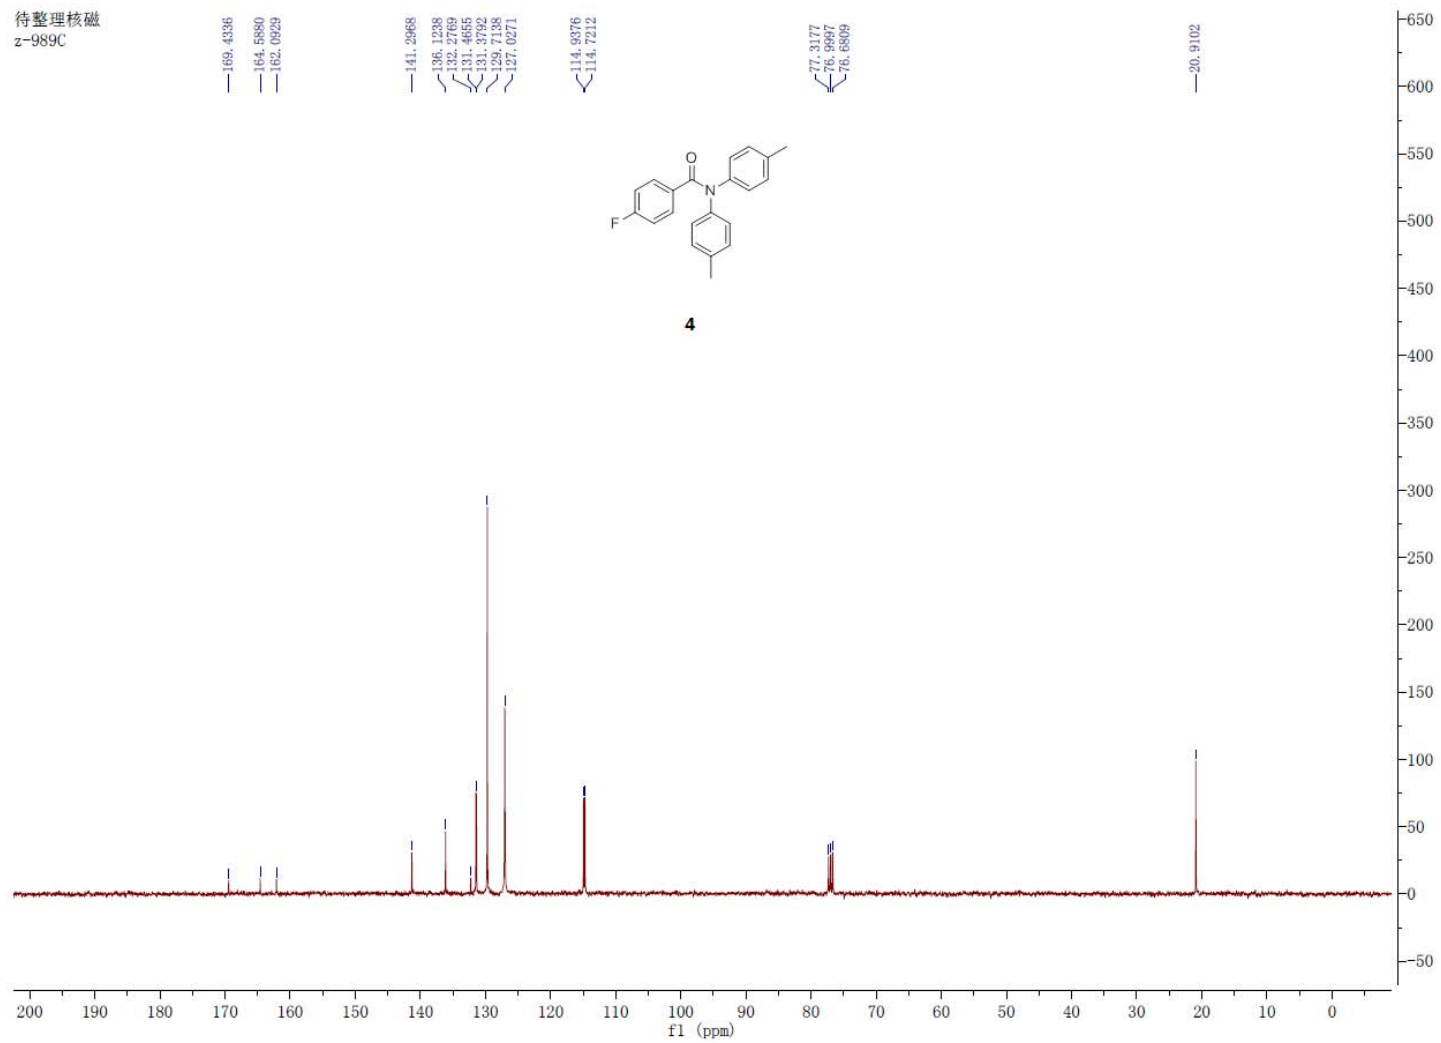

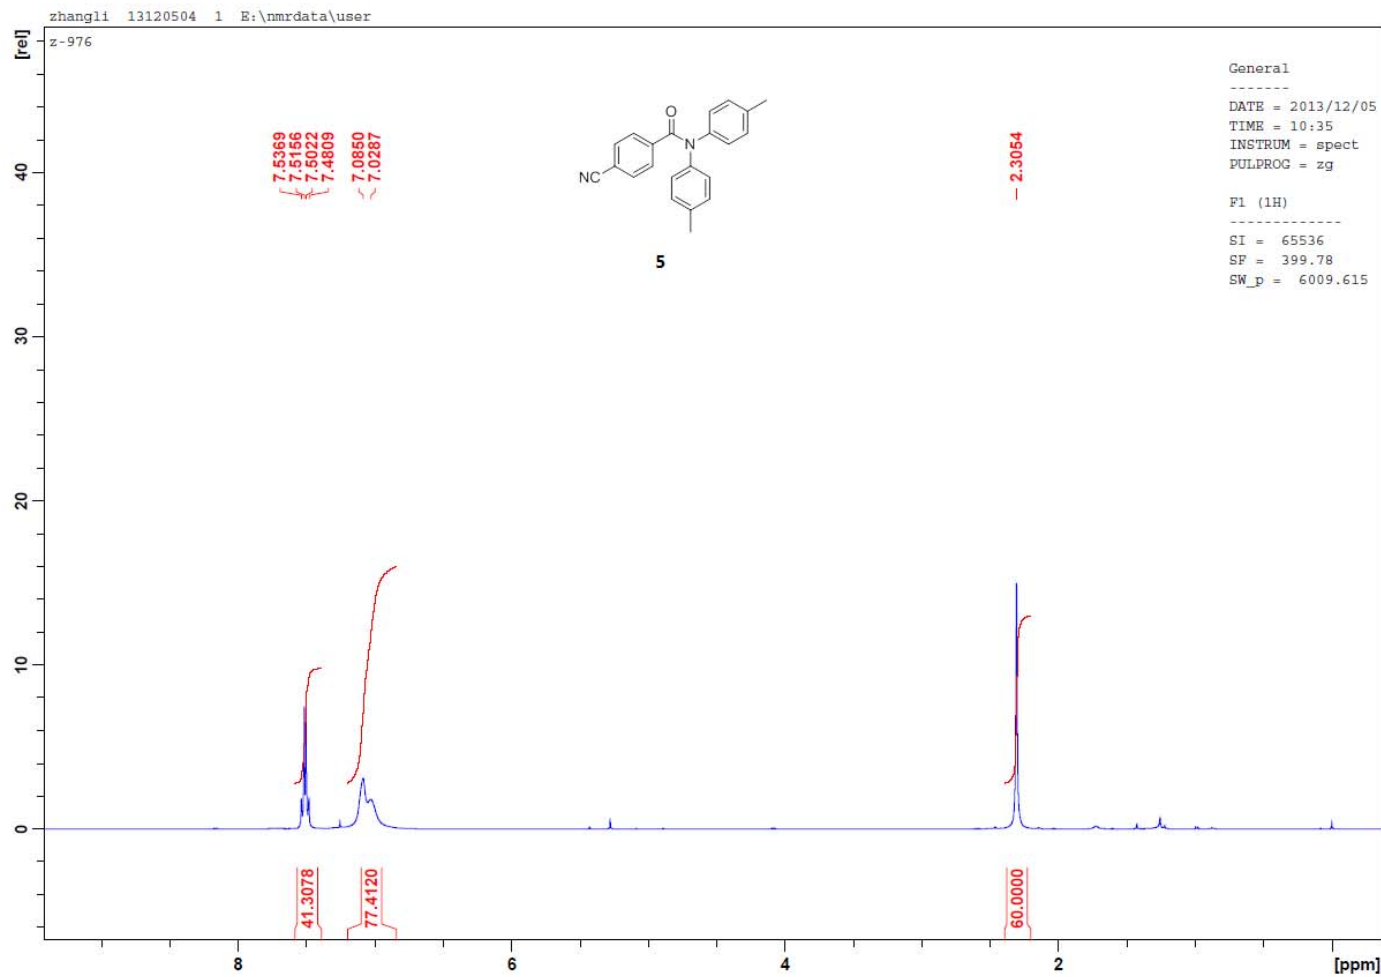

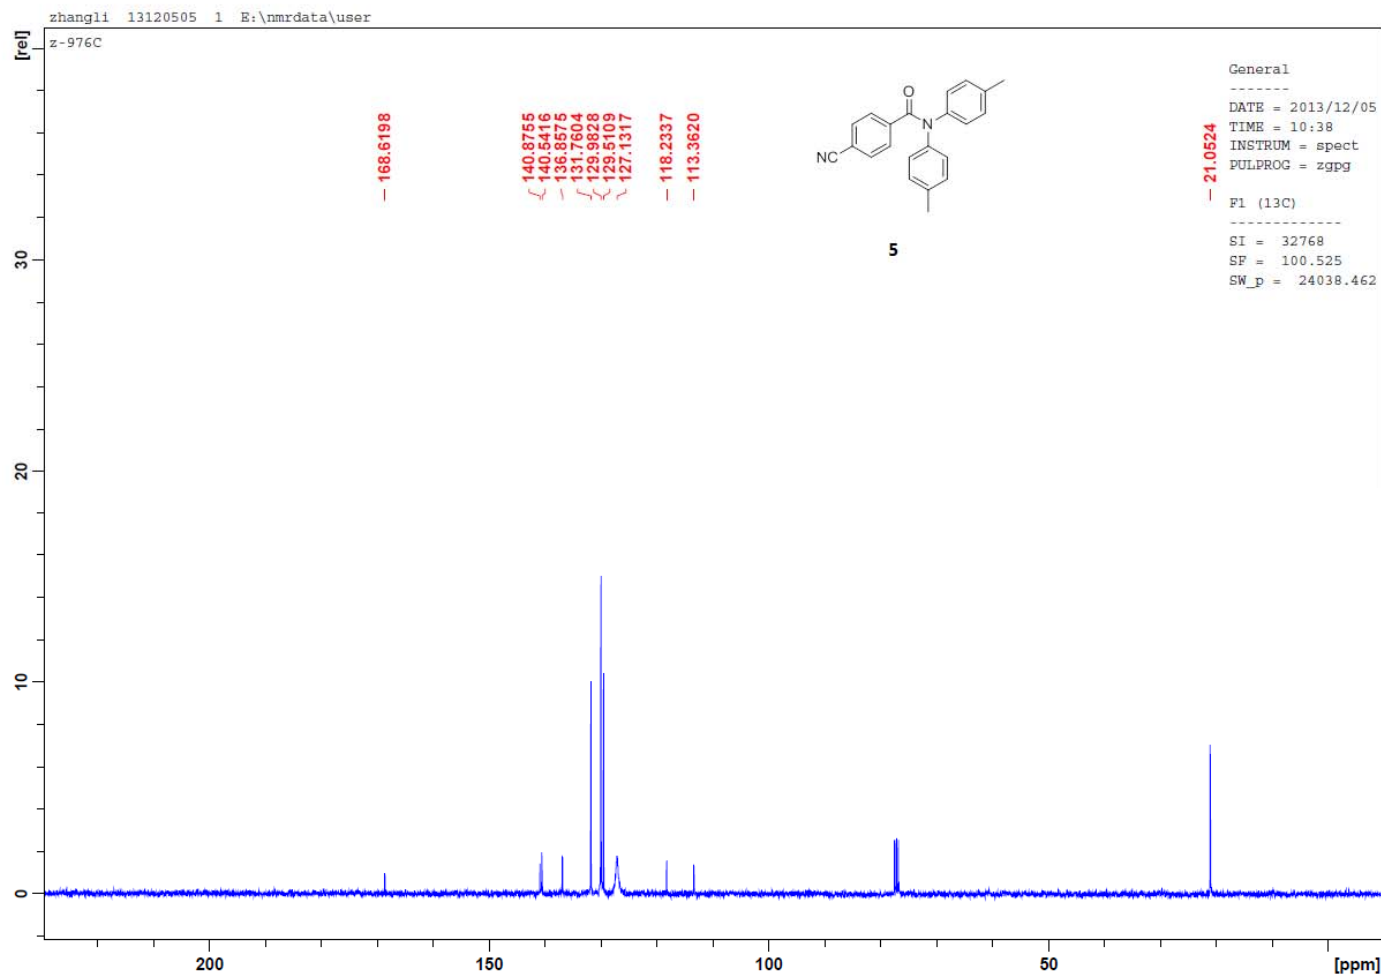

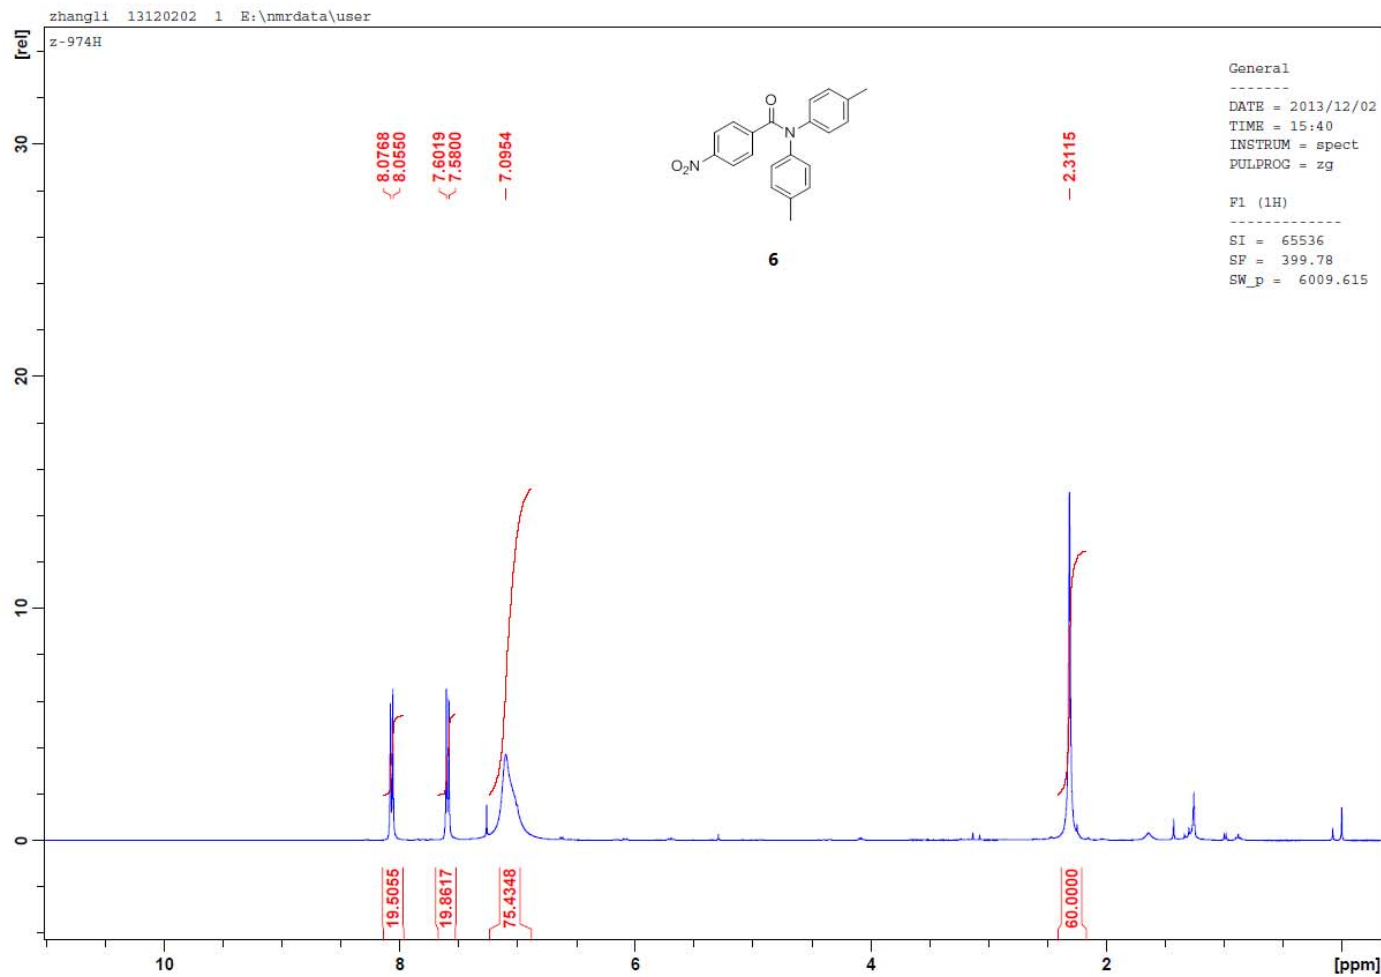



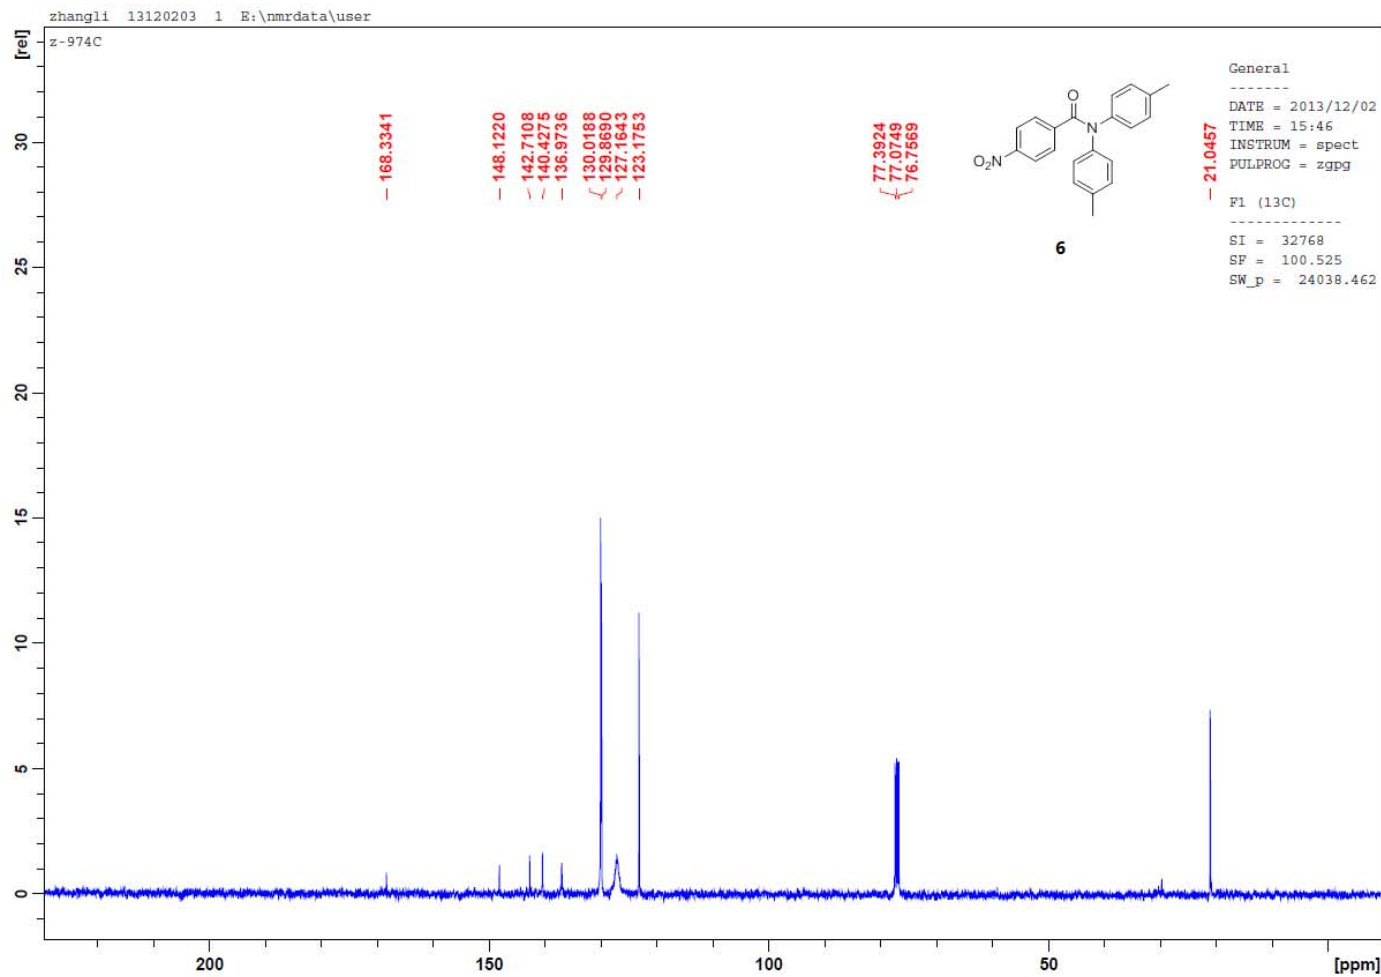

待整理核磁  
z-991

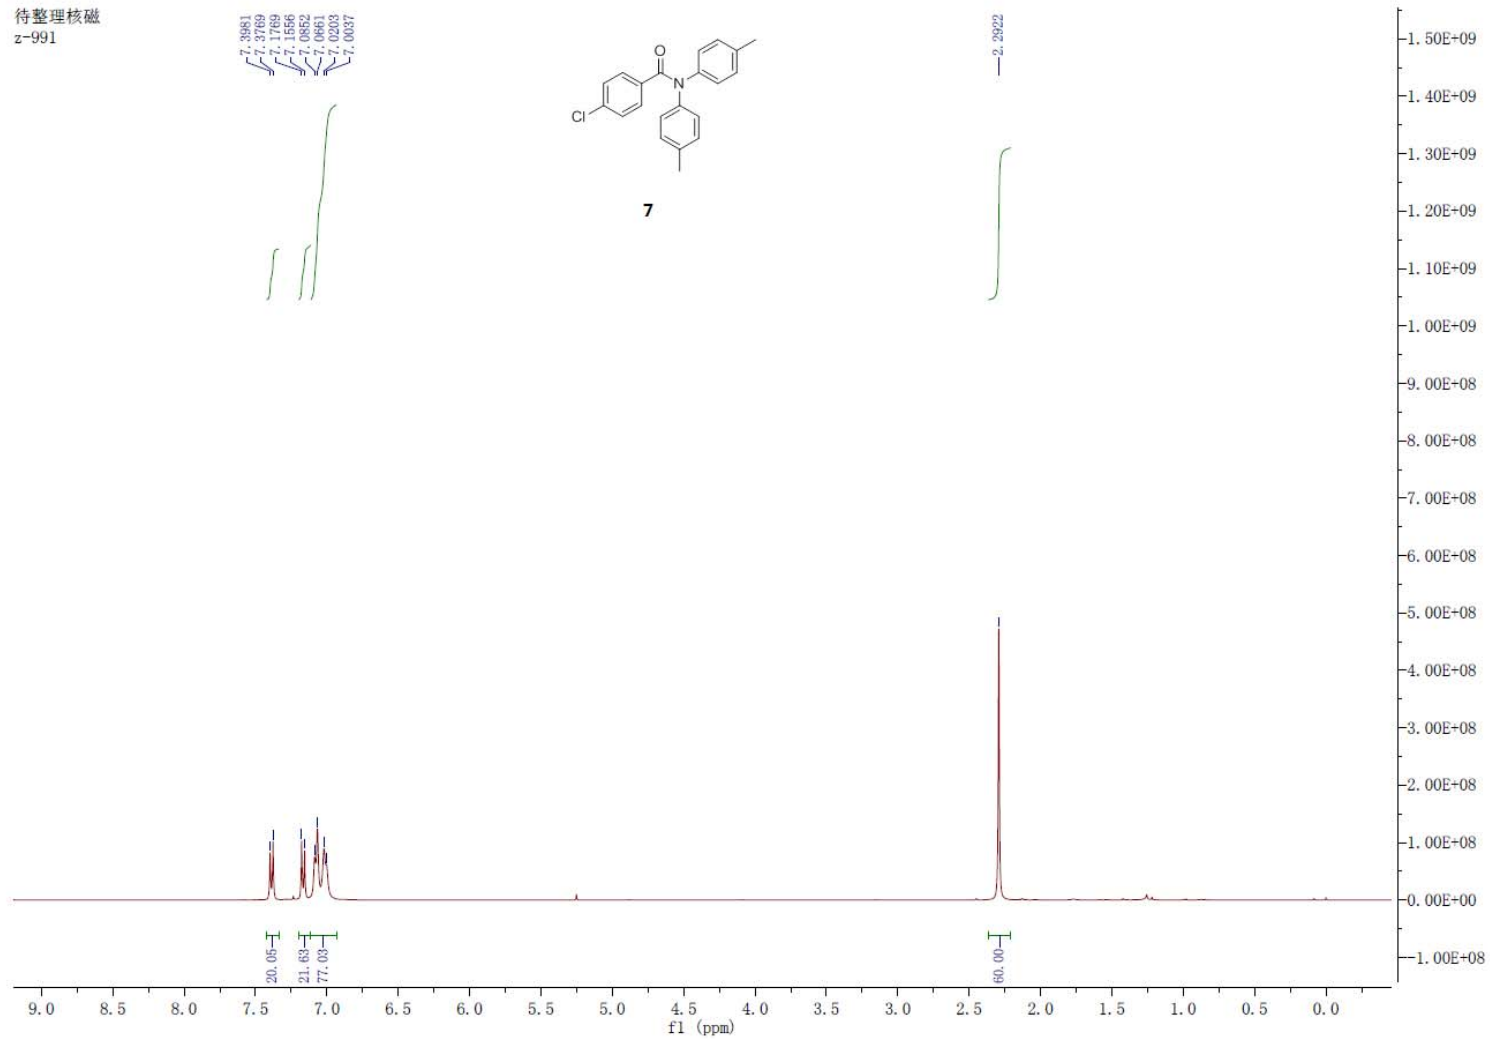

待整理核磁  
z-991C

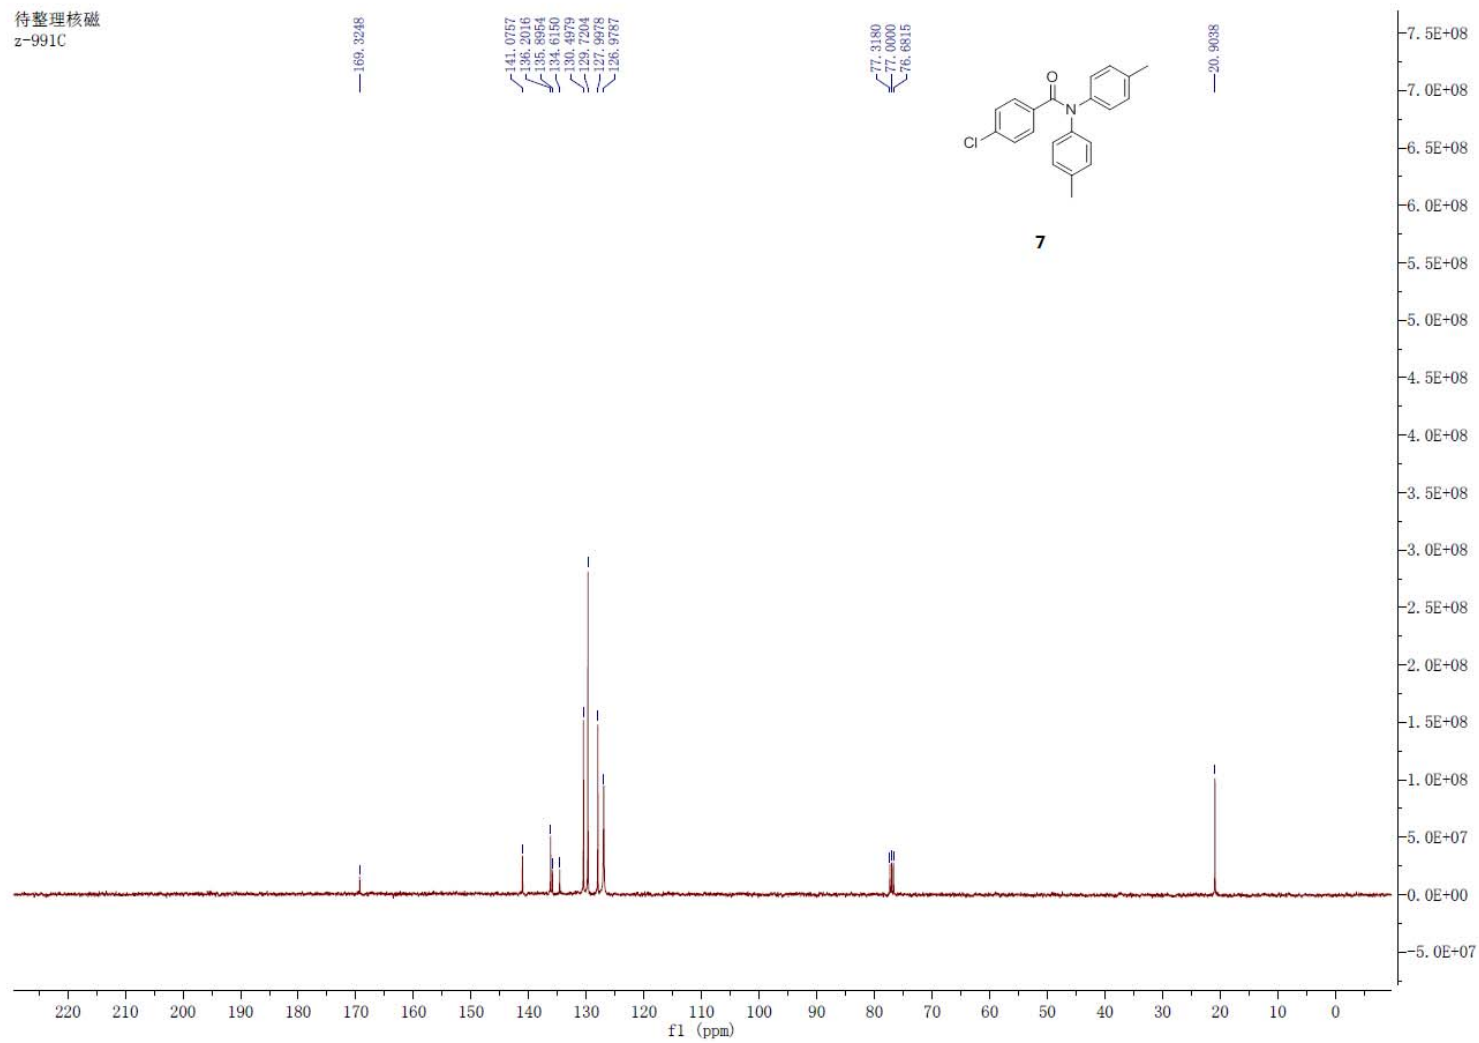

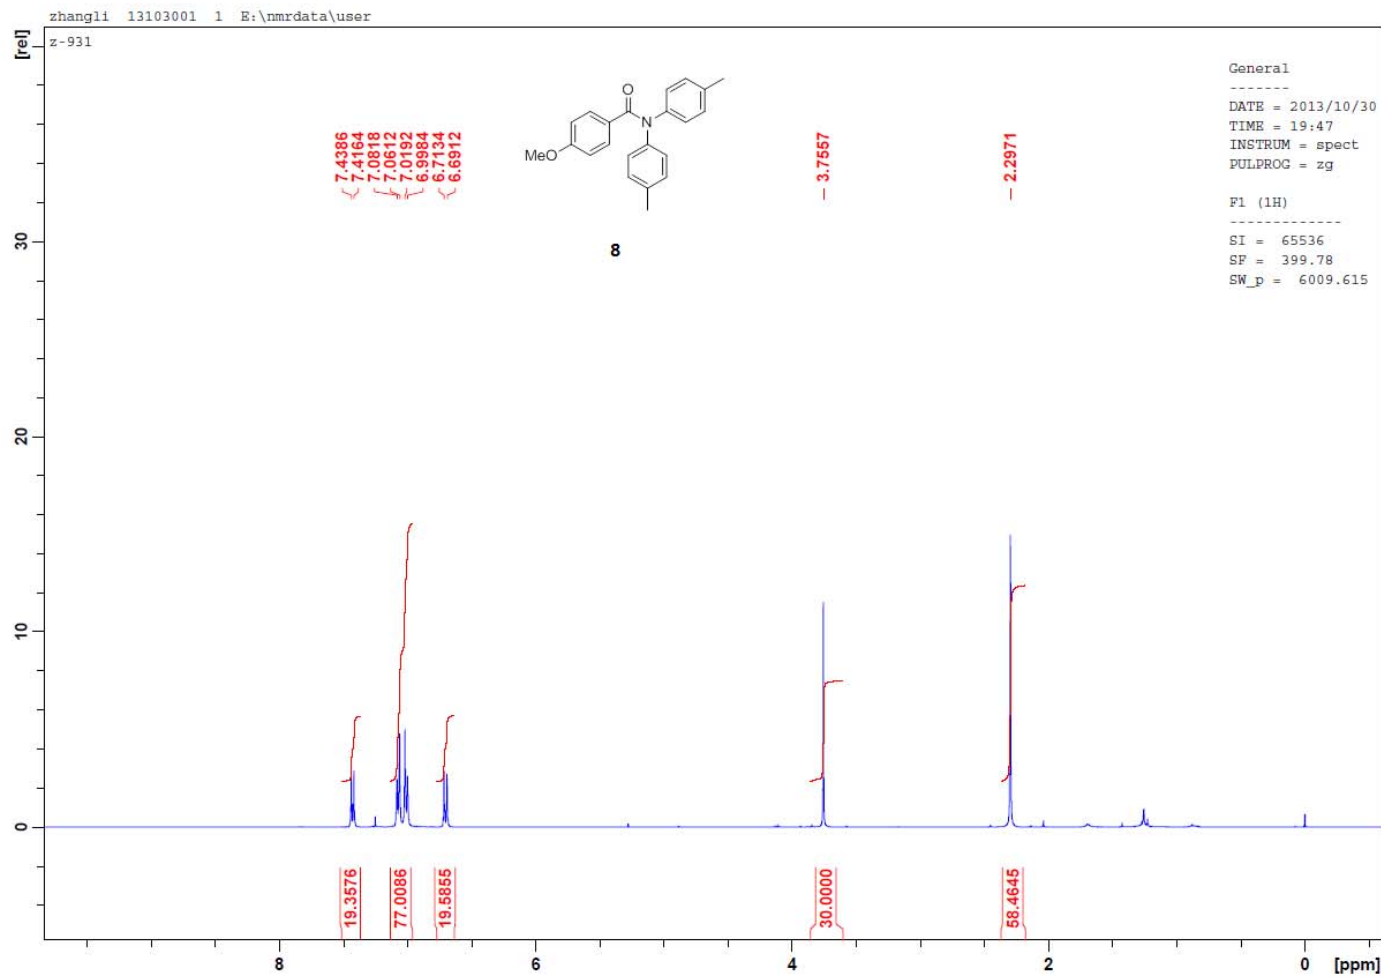

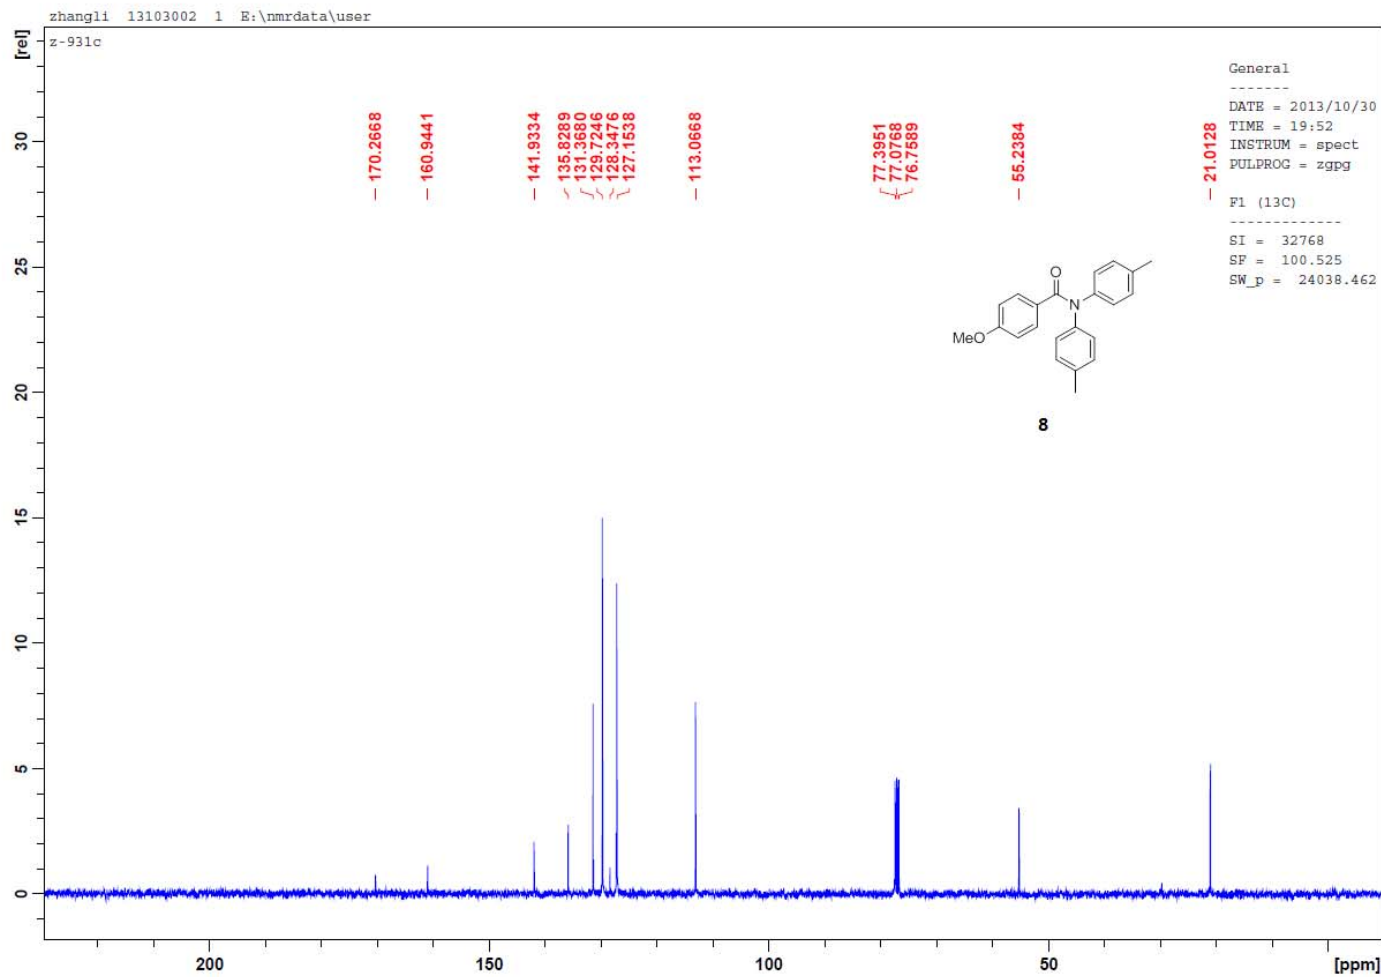

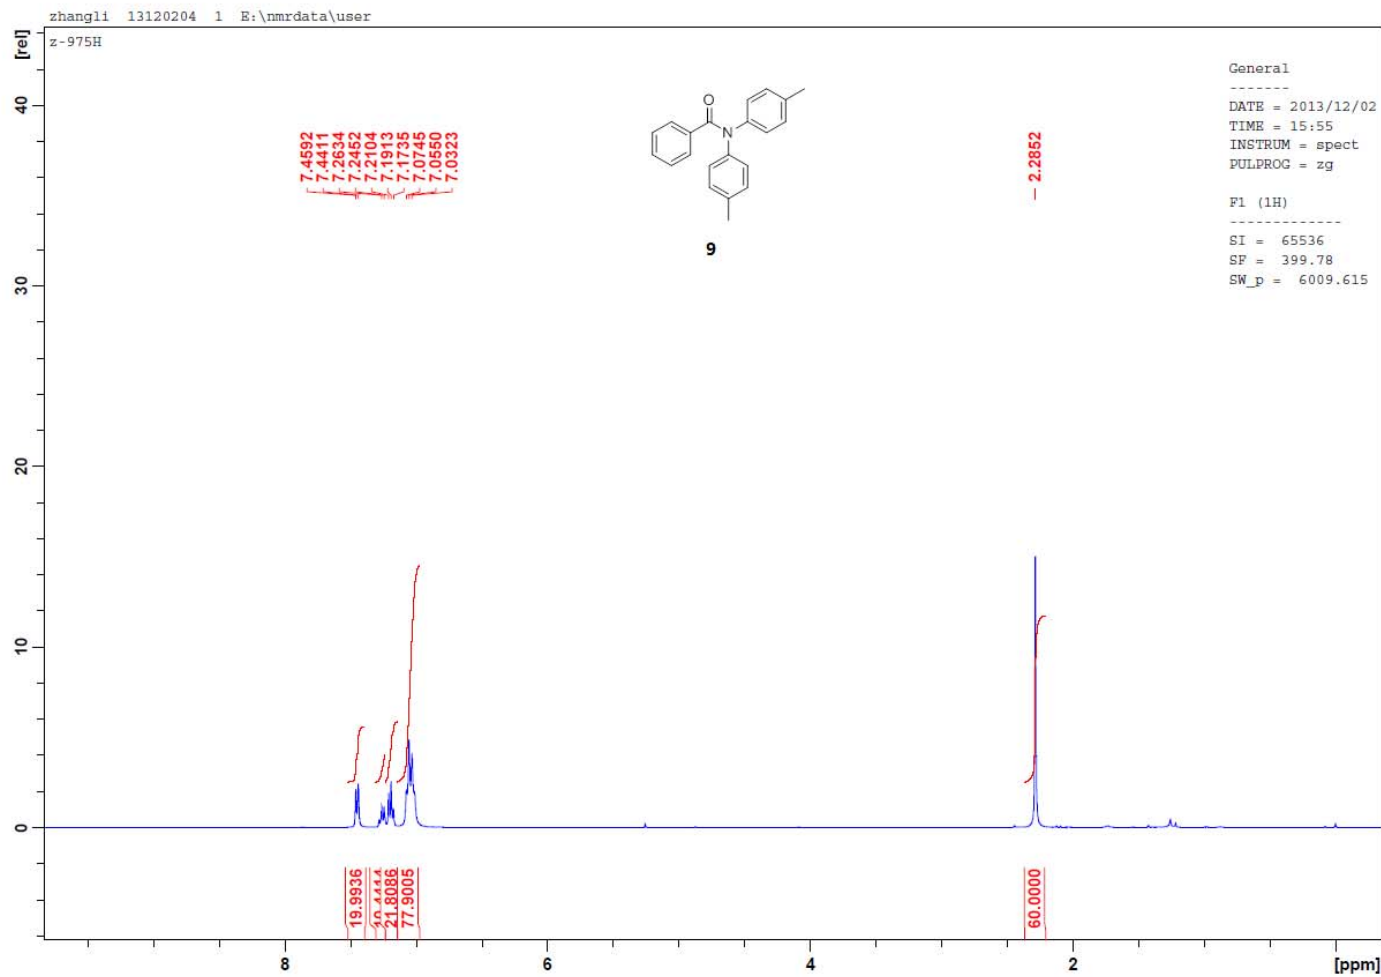

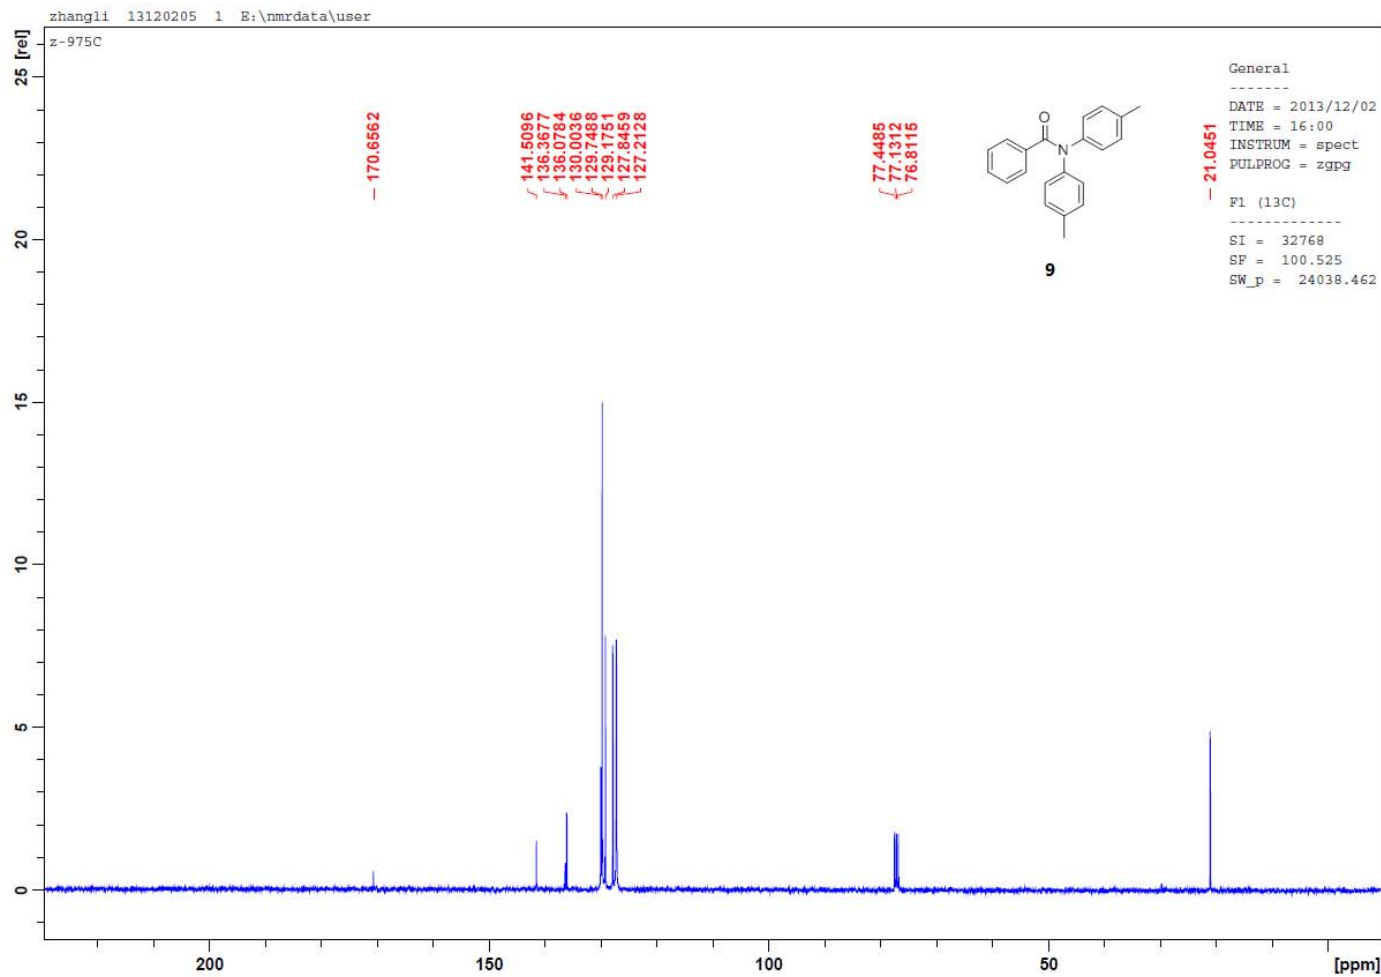

待整理核磁  
z-998H

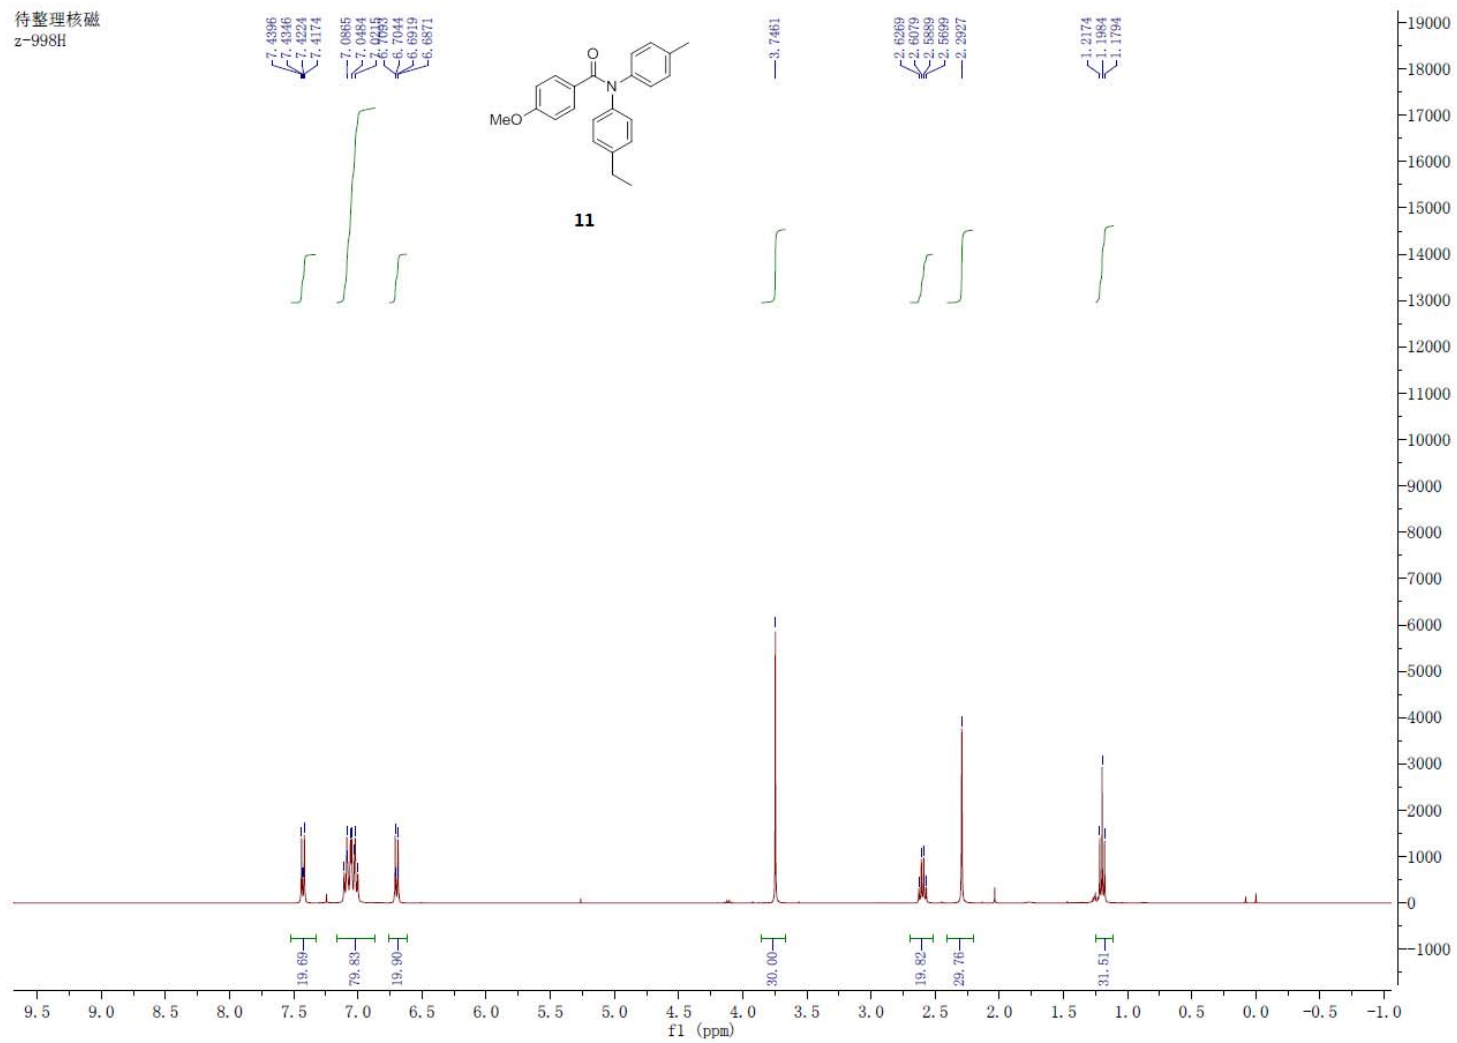



待整理核磁  
z-998C

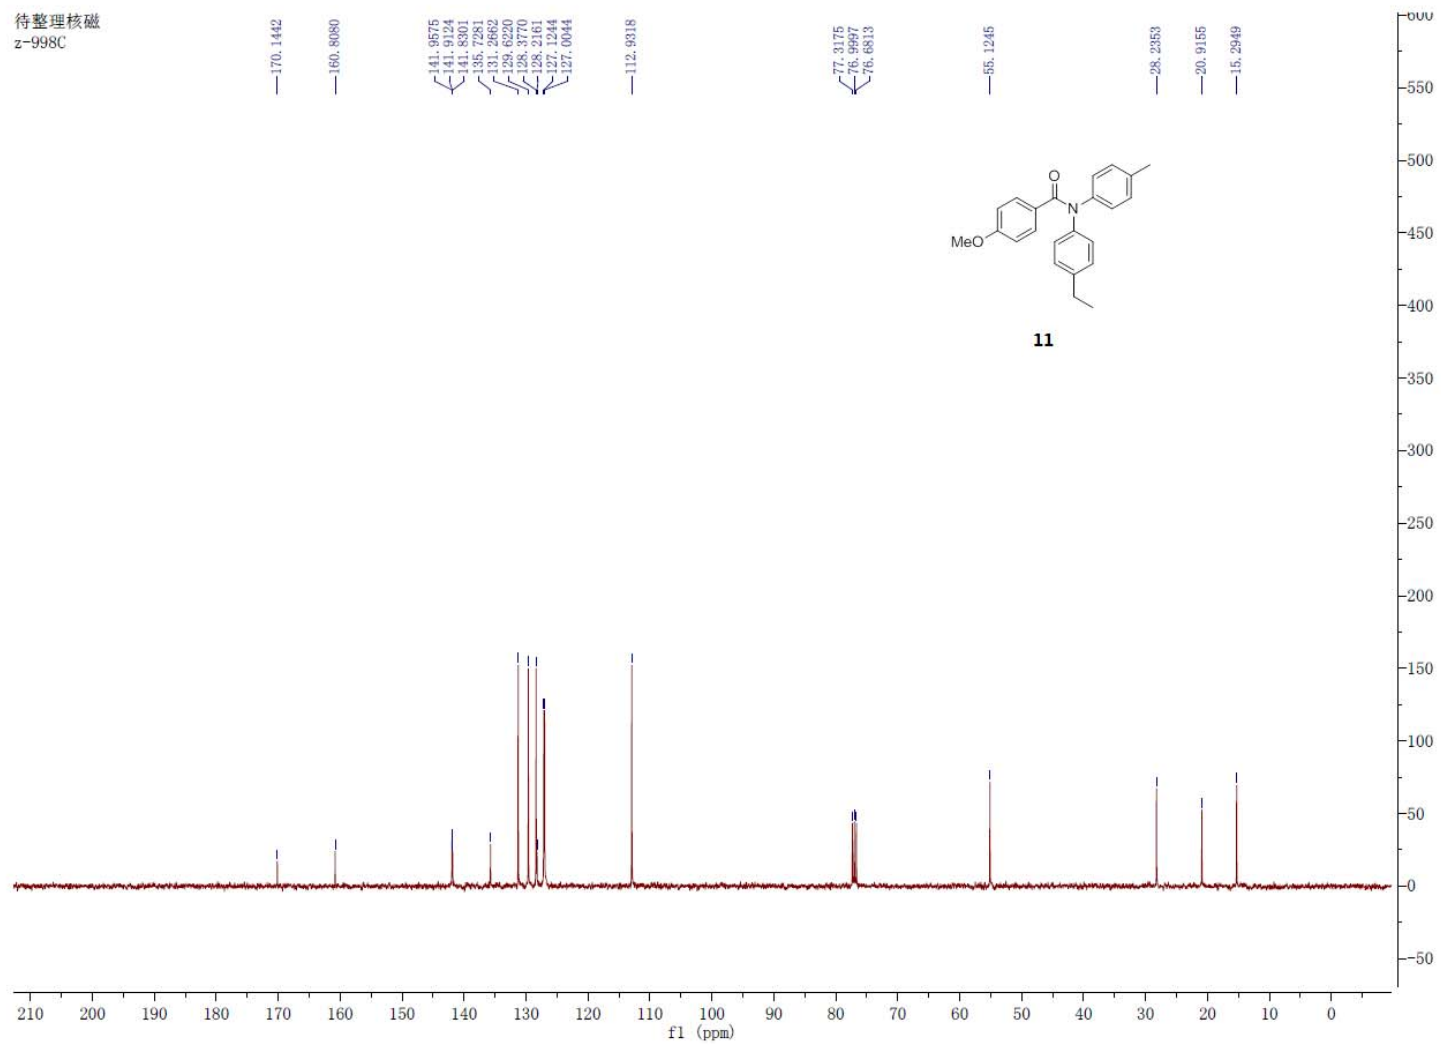

待整理核磁  
z-999H

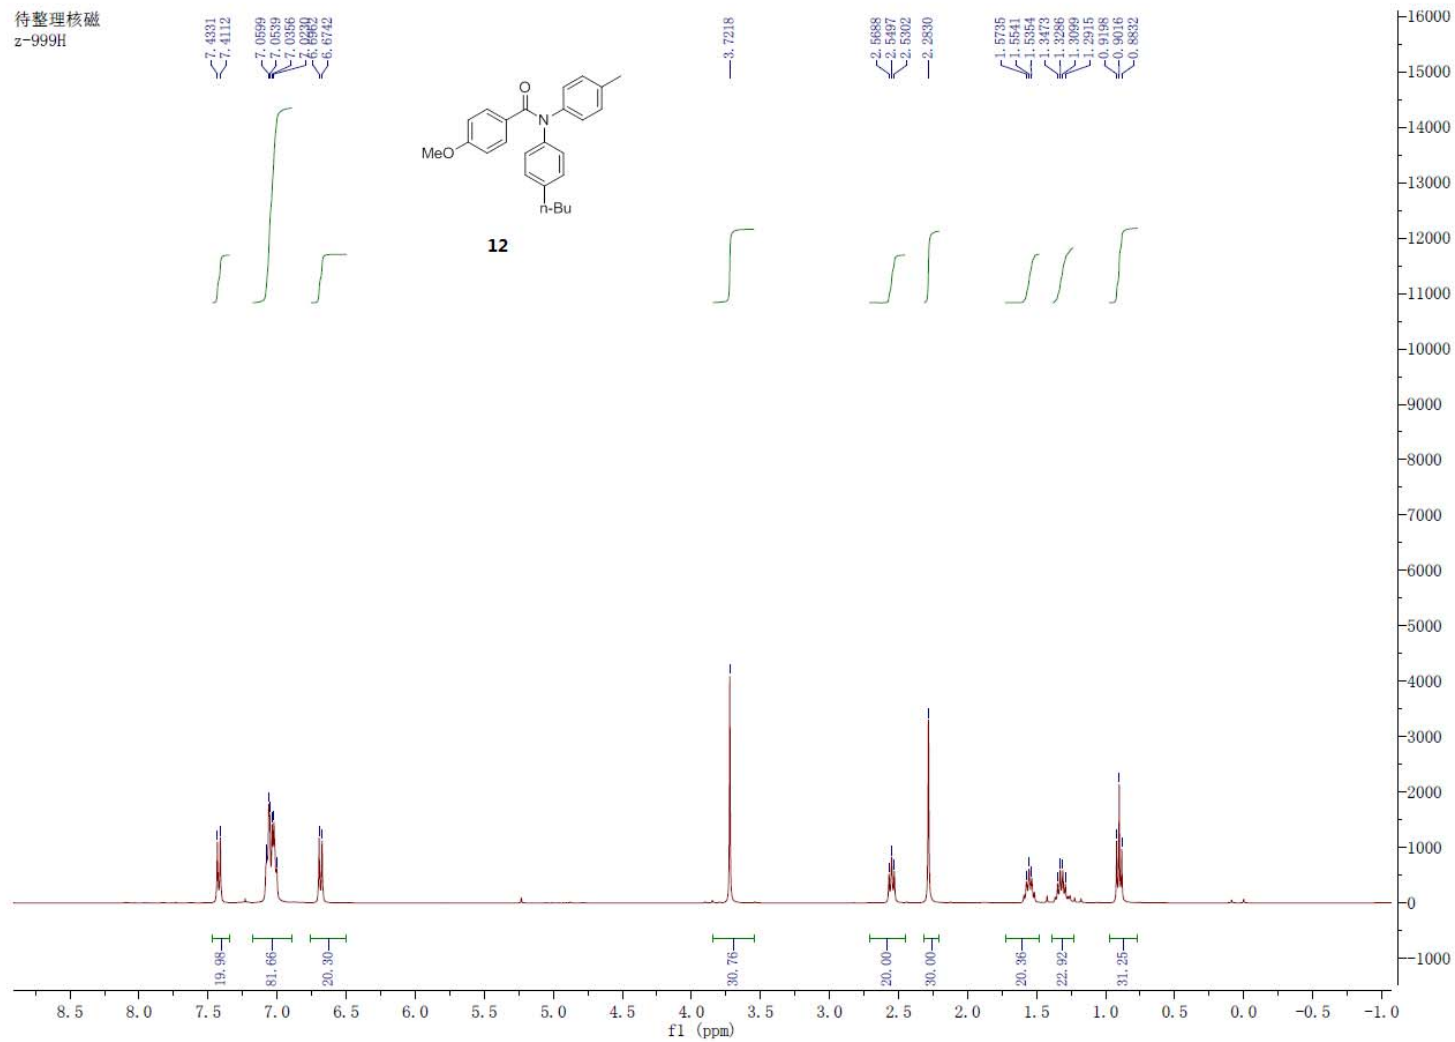

待整理核磁  
z-999C

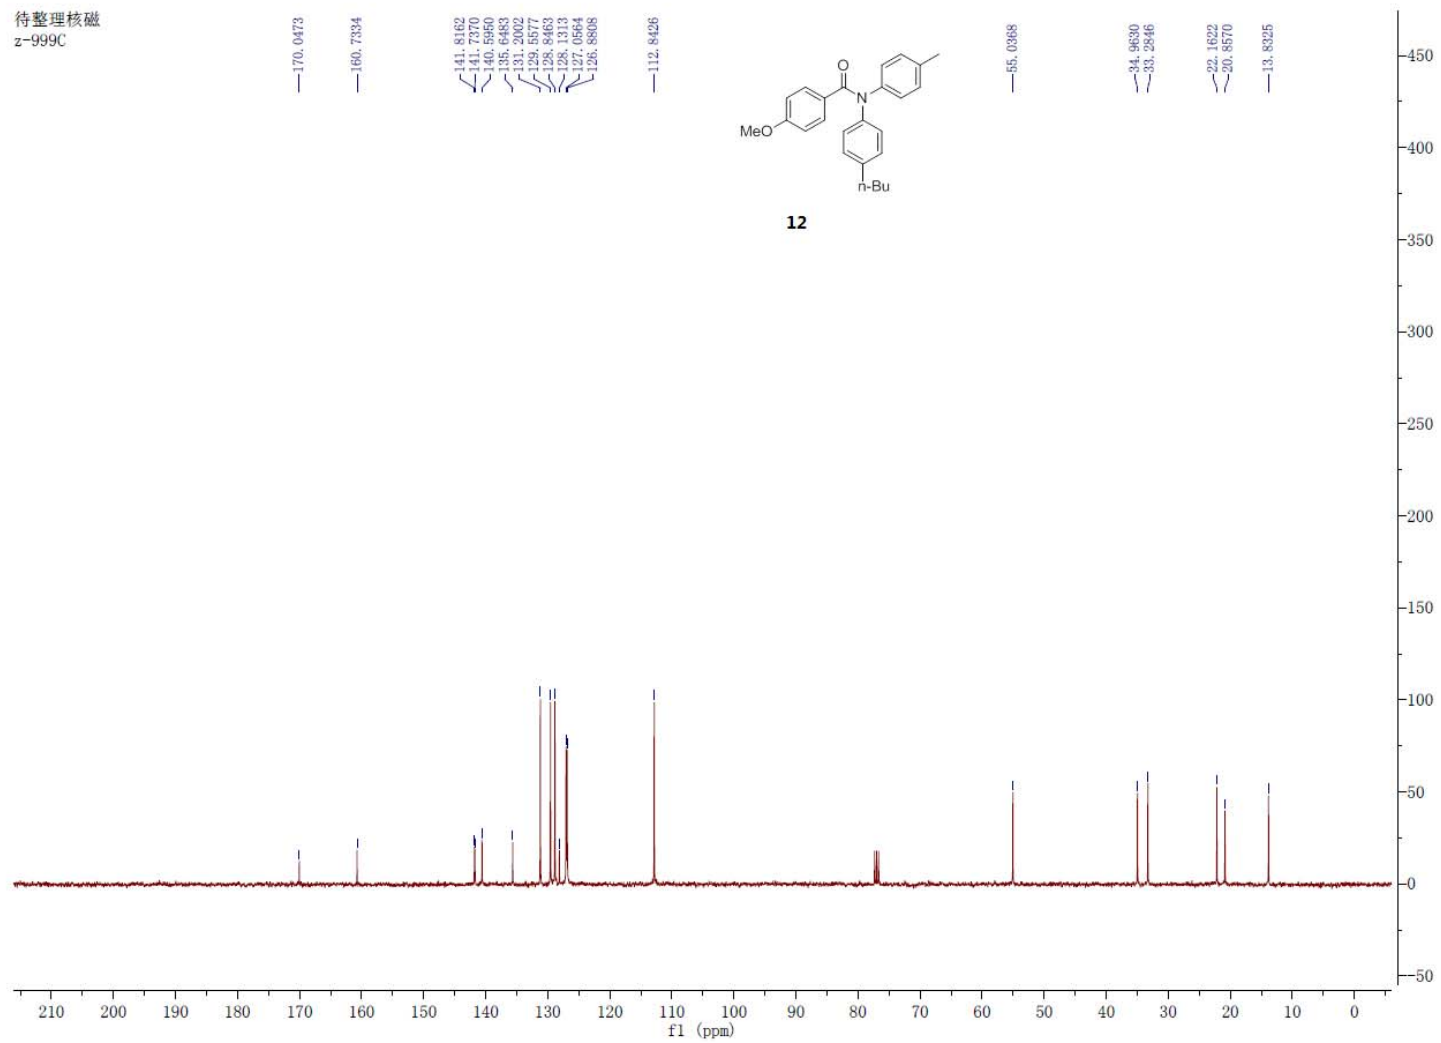

待整理核磁  
z-1000H

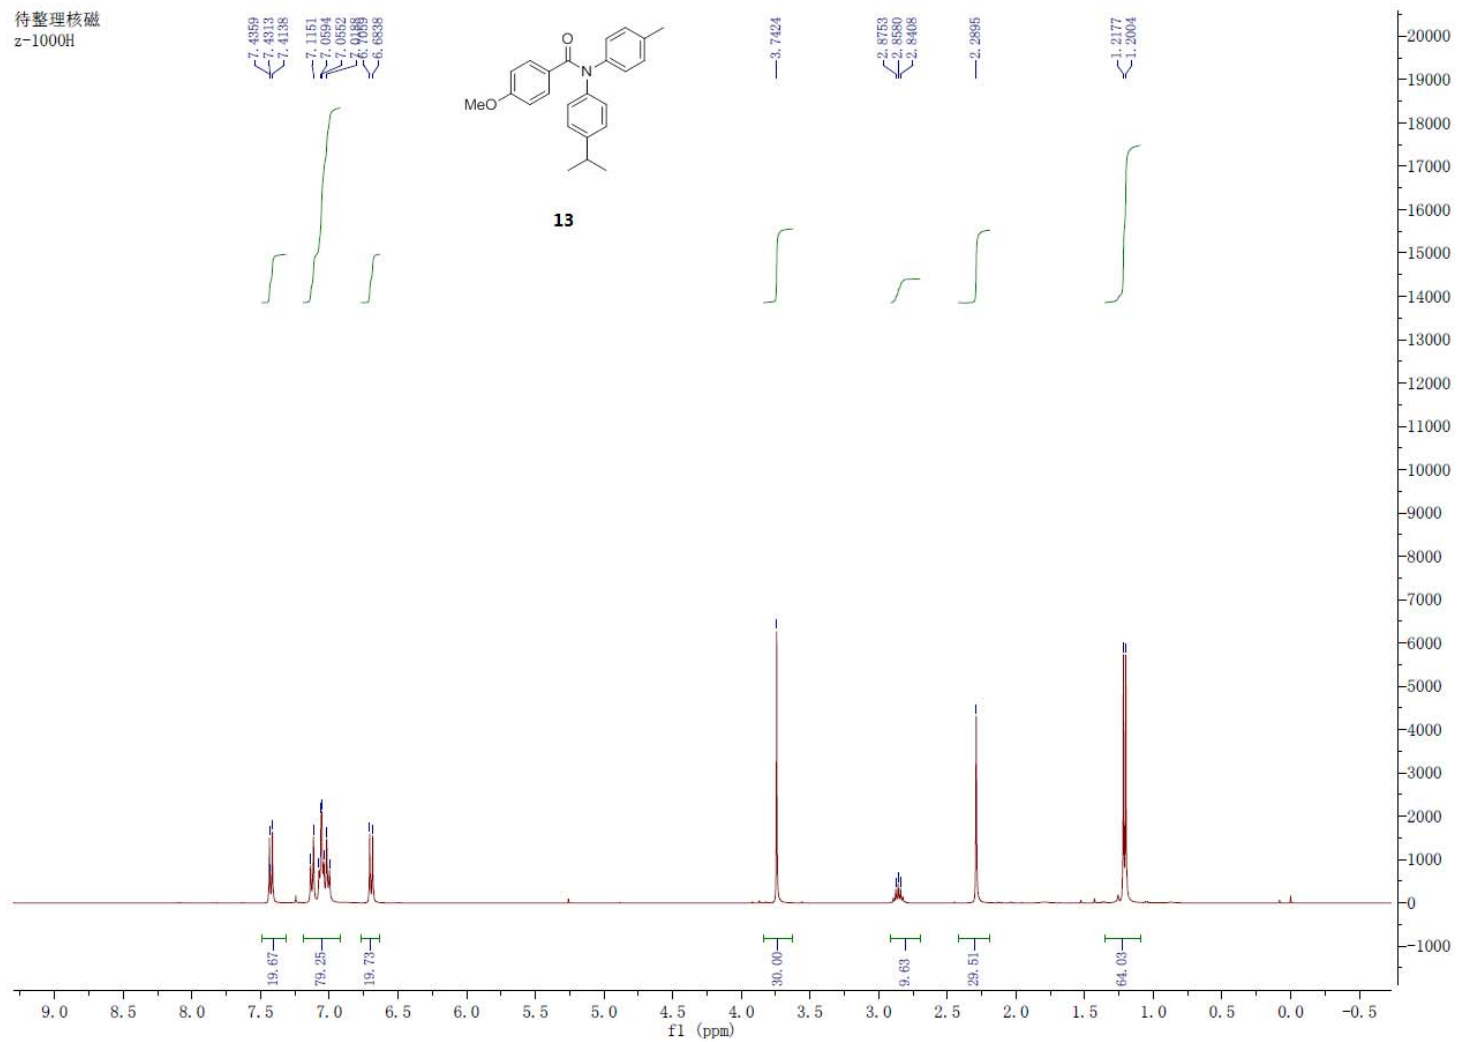

待整理核磁  
z-1000C

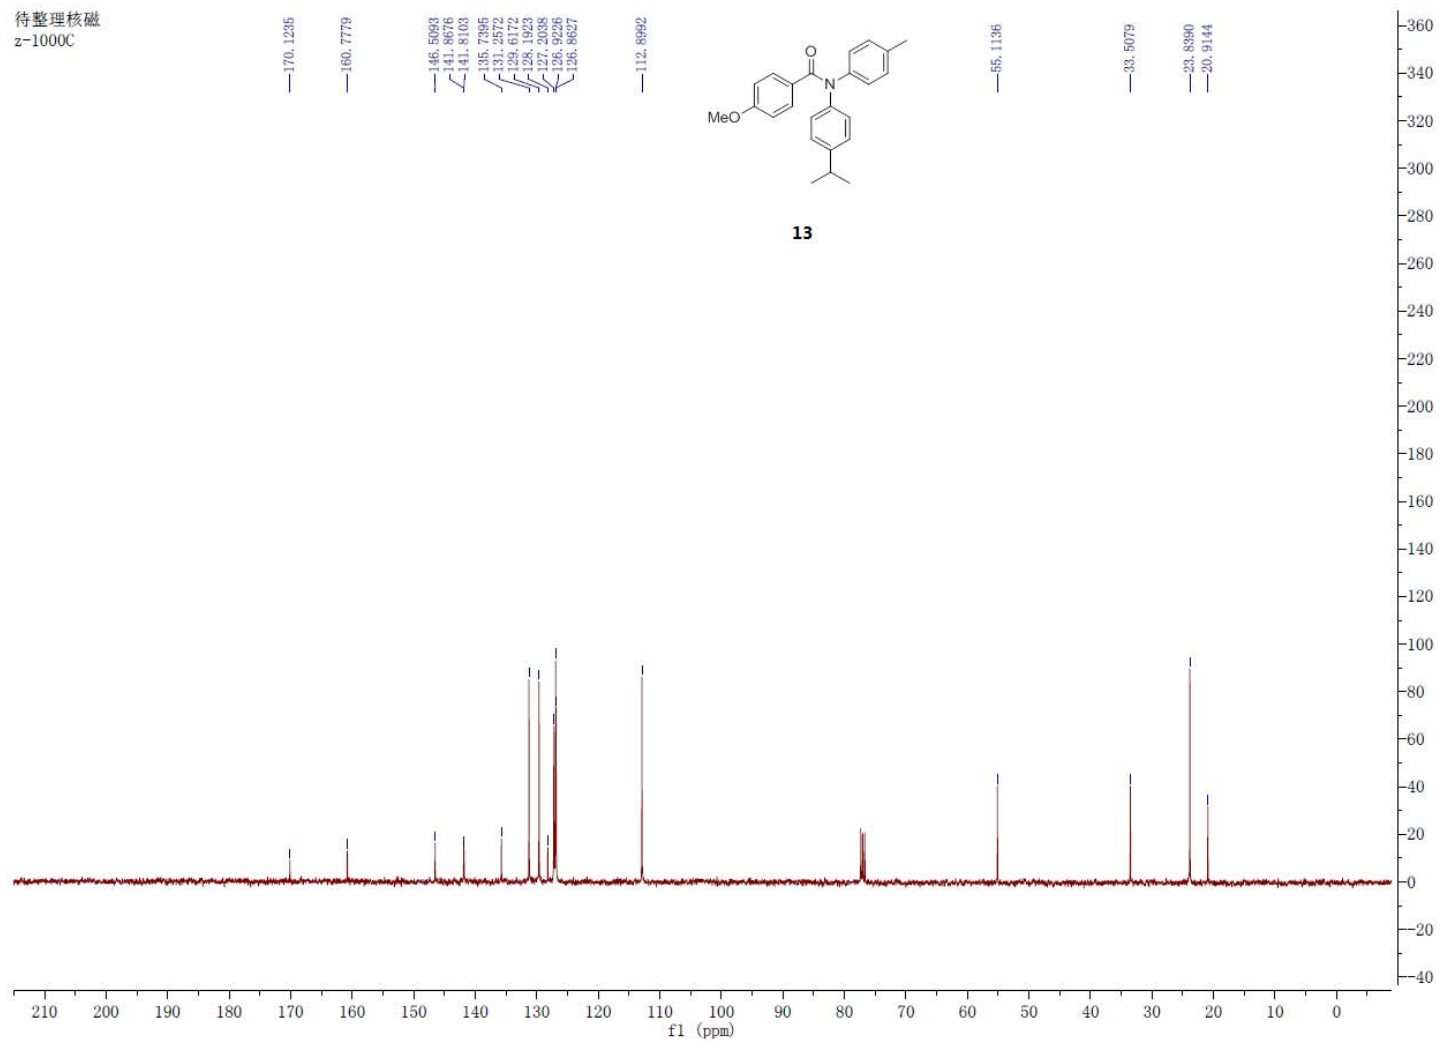

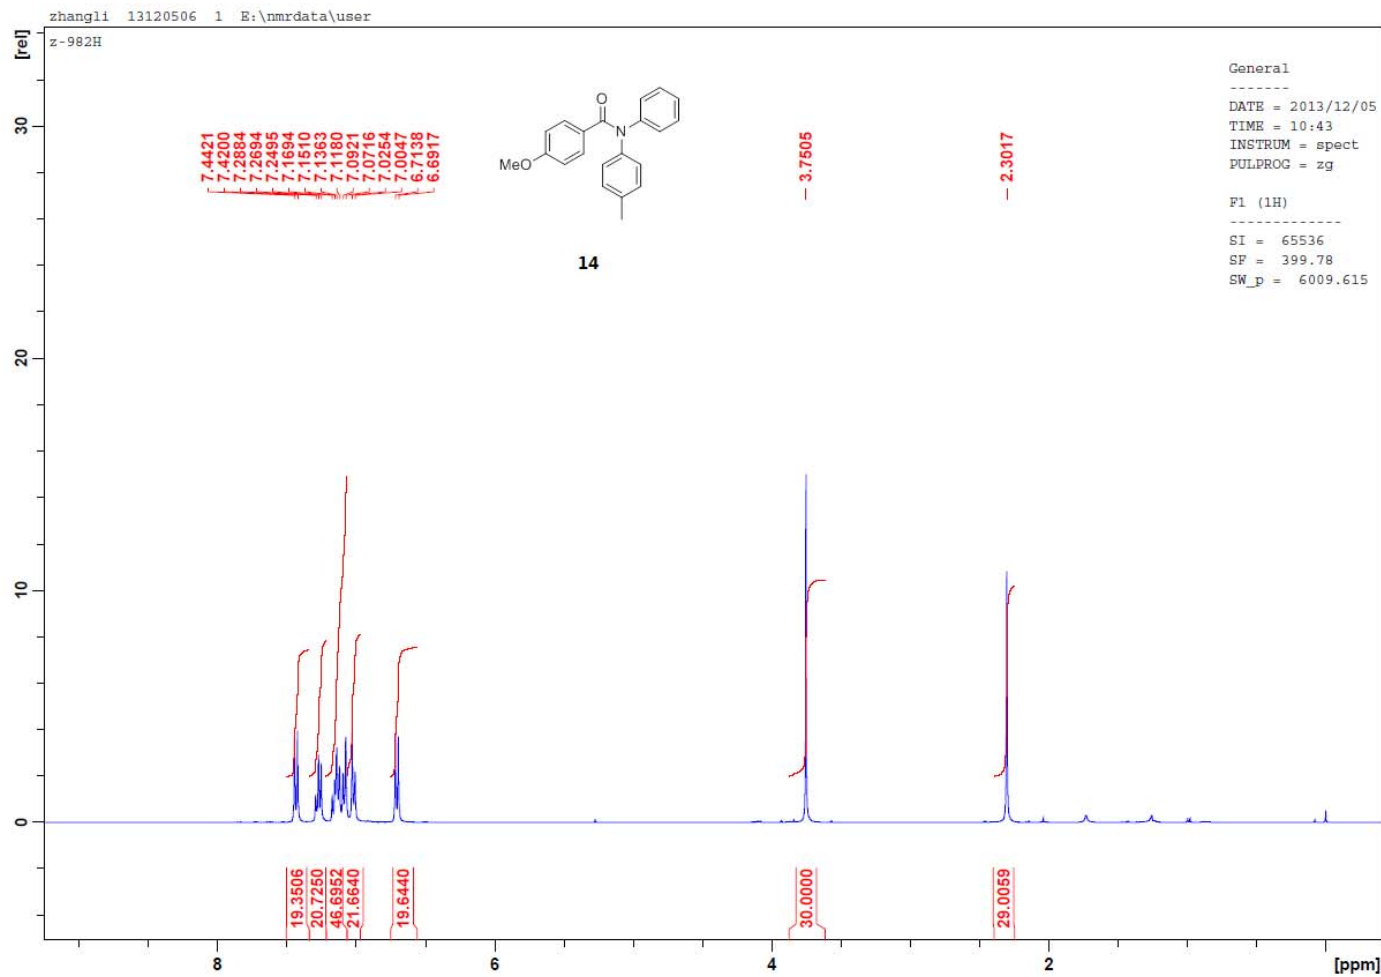

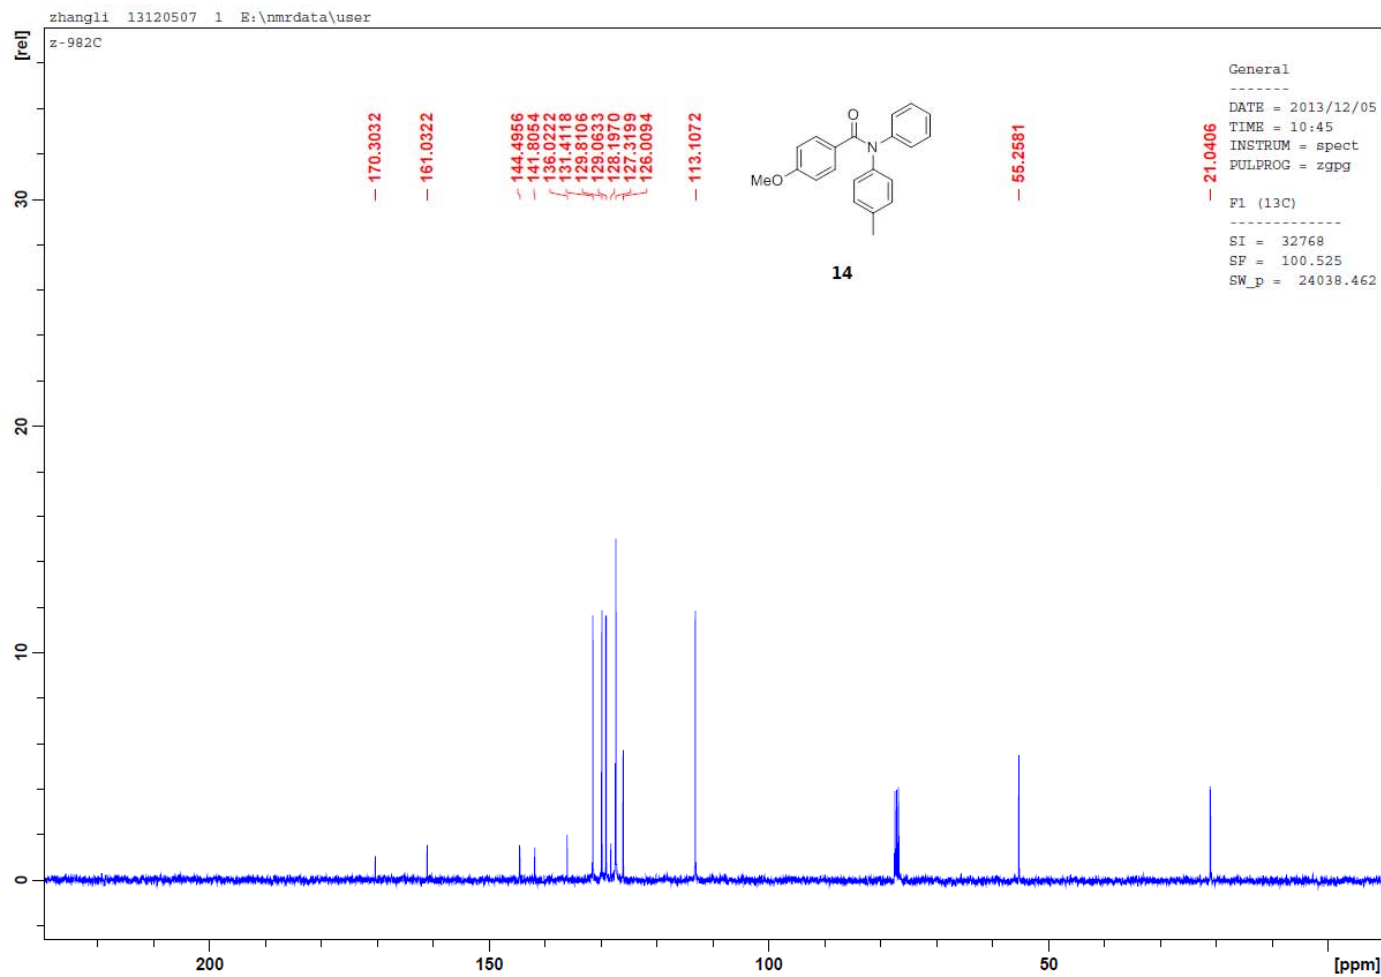

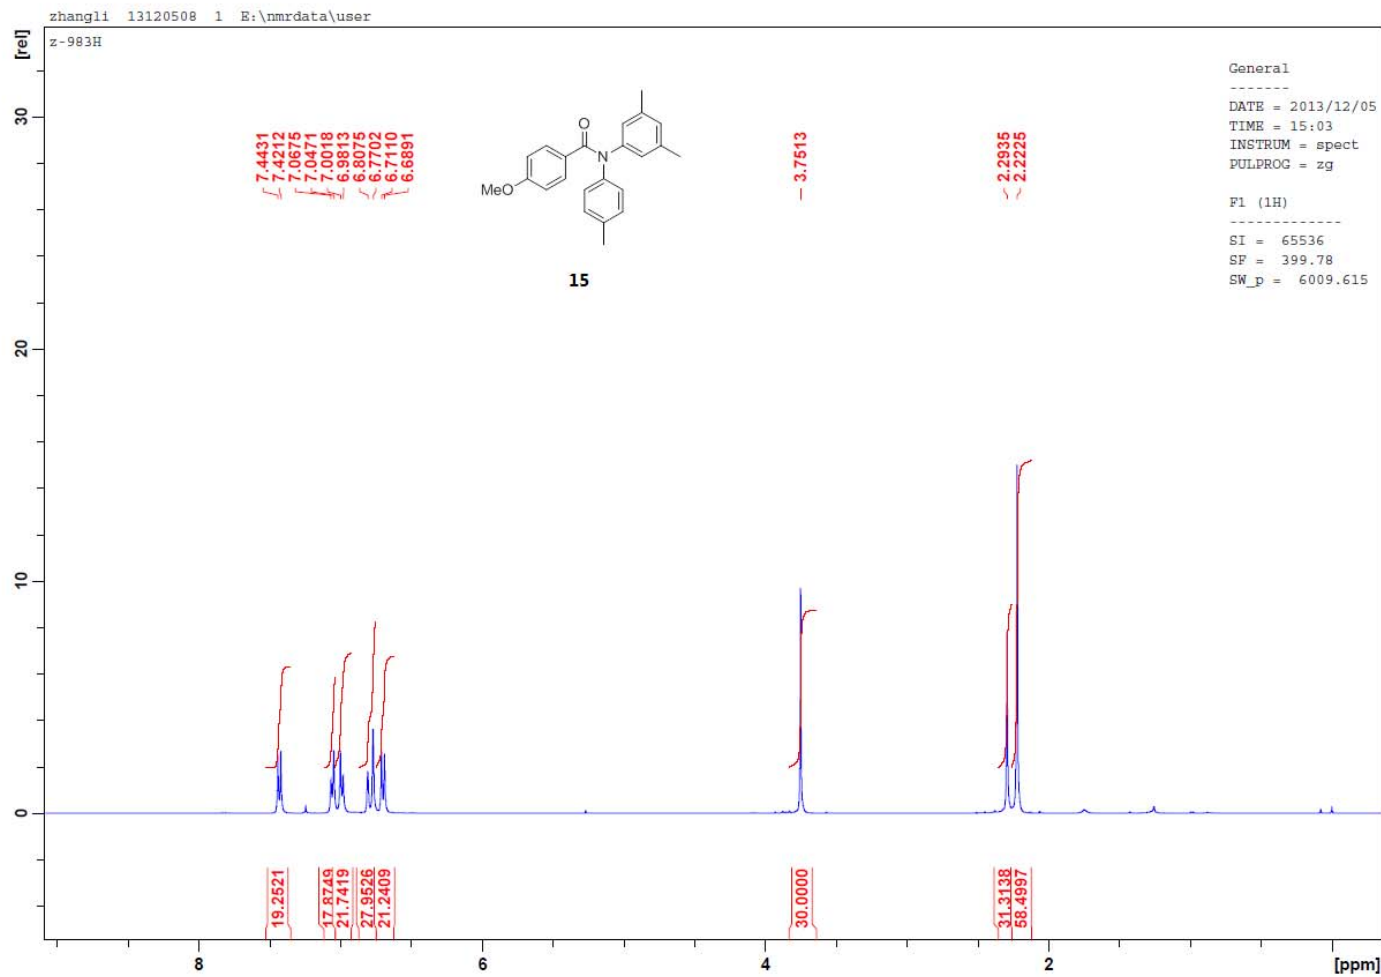



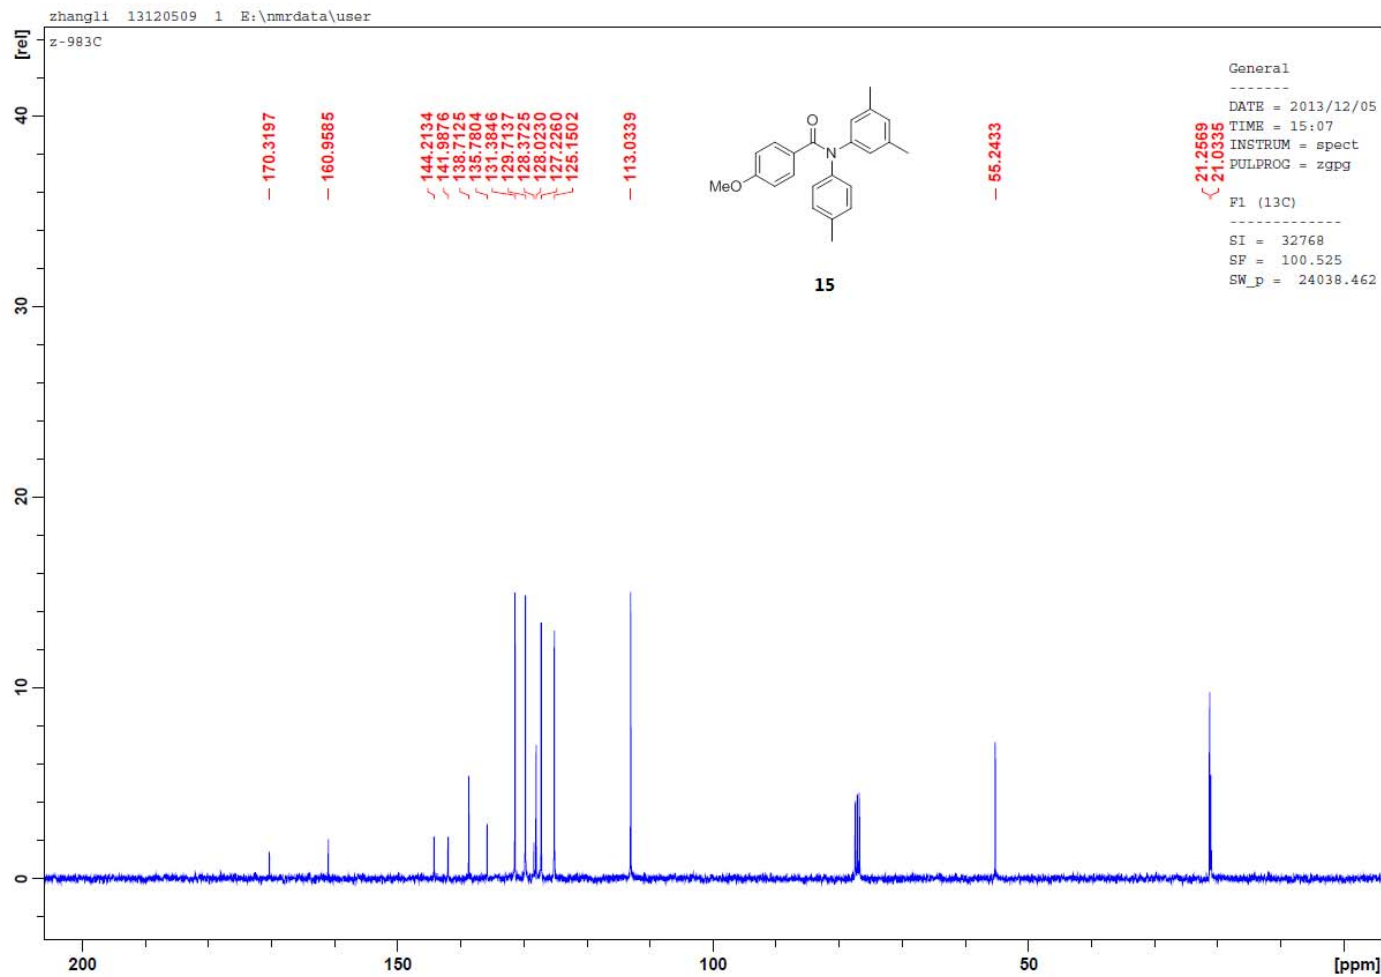

待整理核磁  
z-1001H

7.4493  
7.4425  
7.4376  
7.4253  
7.4204  
7.4136  
7.2416  
7.0670  
7.0484  
7.0302  
6.9866  
6.9892  
6.8805  
6.8563  
6.8408  
6.8365  
6.7136  
6.7069  
6.7021  
6.6895  
6.6847  
6.6780

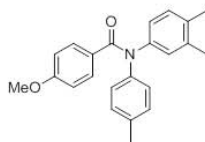

3.7455

2.2890  
2.1963  
2.1696

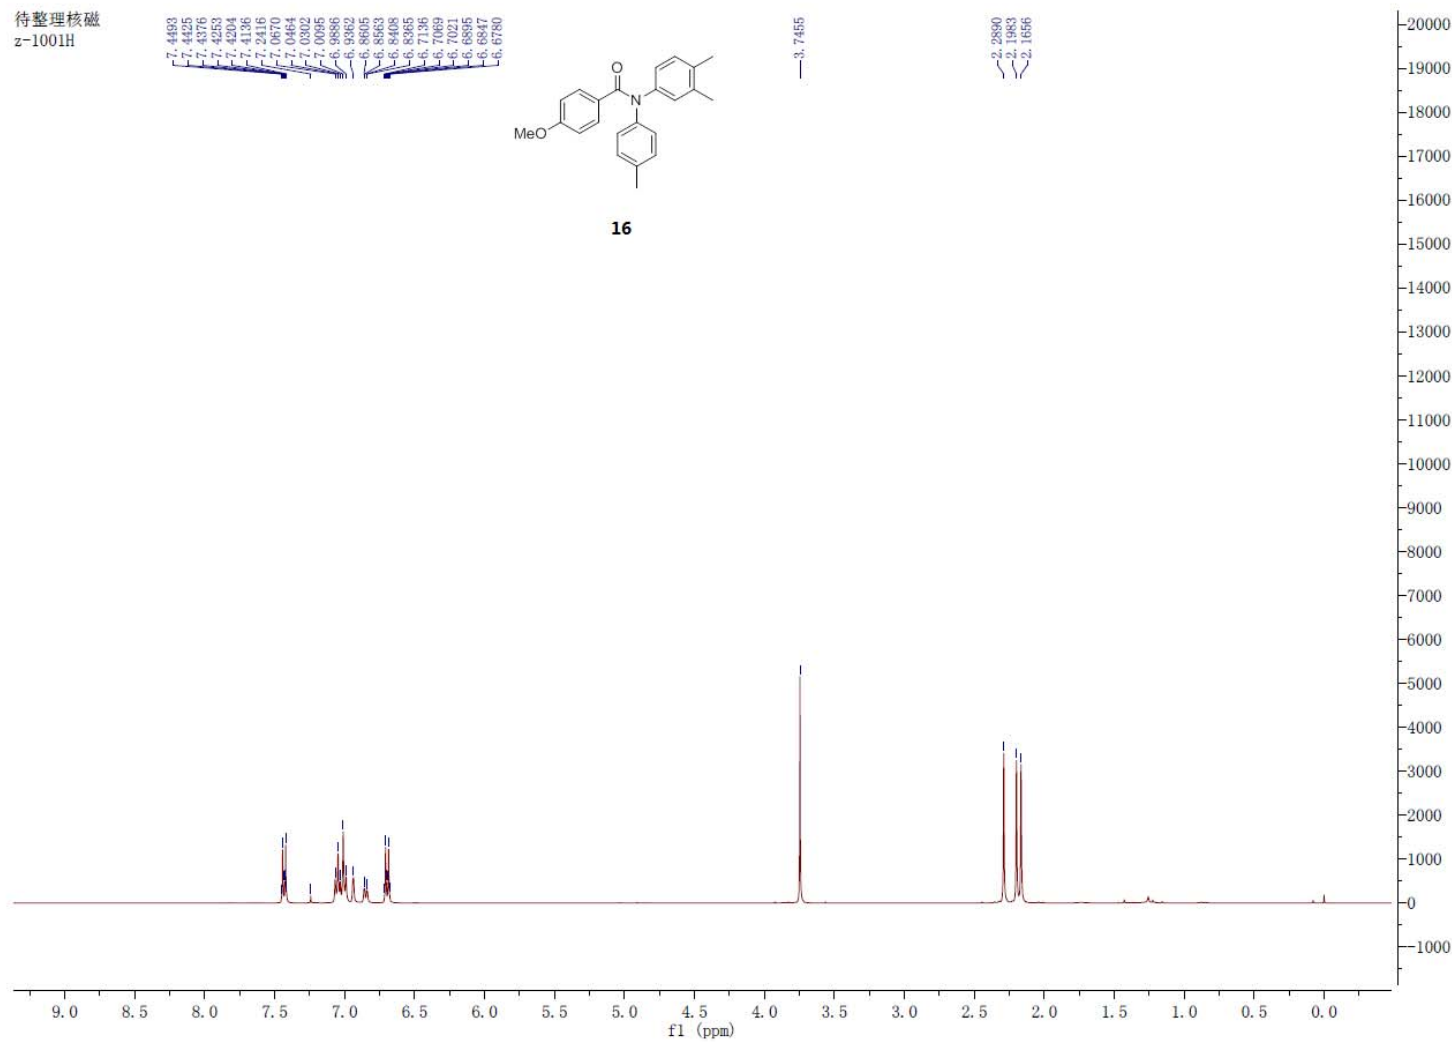

待整理核磁  
z-1001C

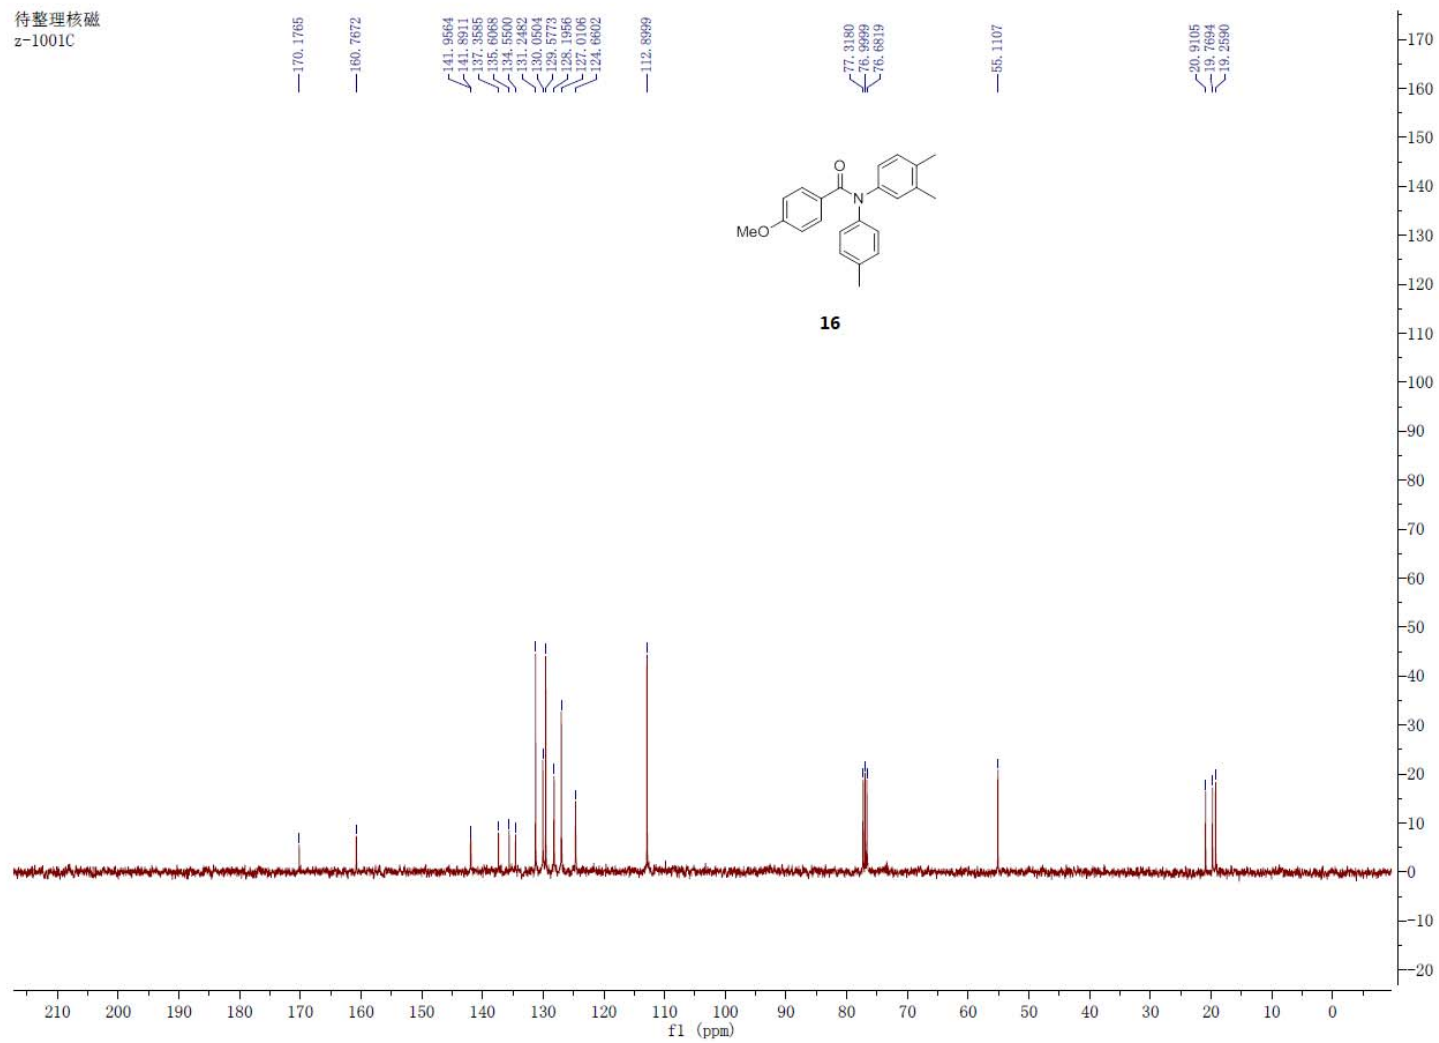

zhangli  
z-986

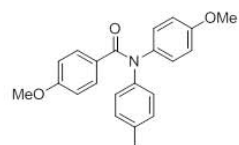

17

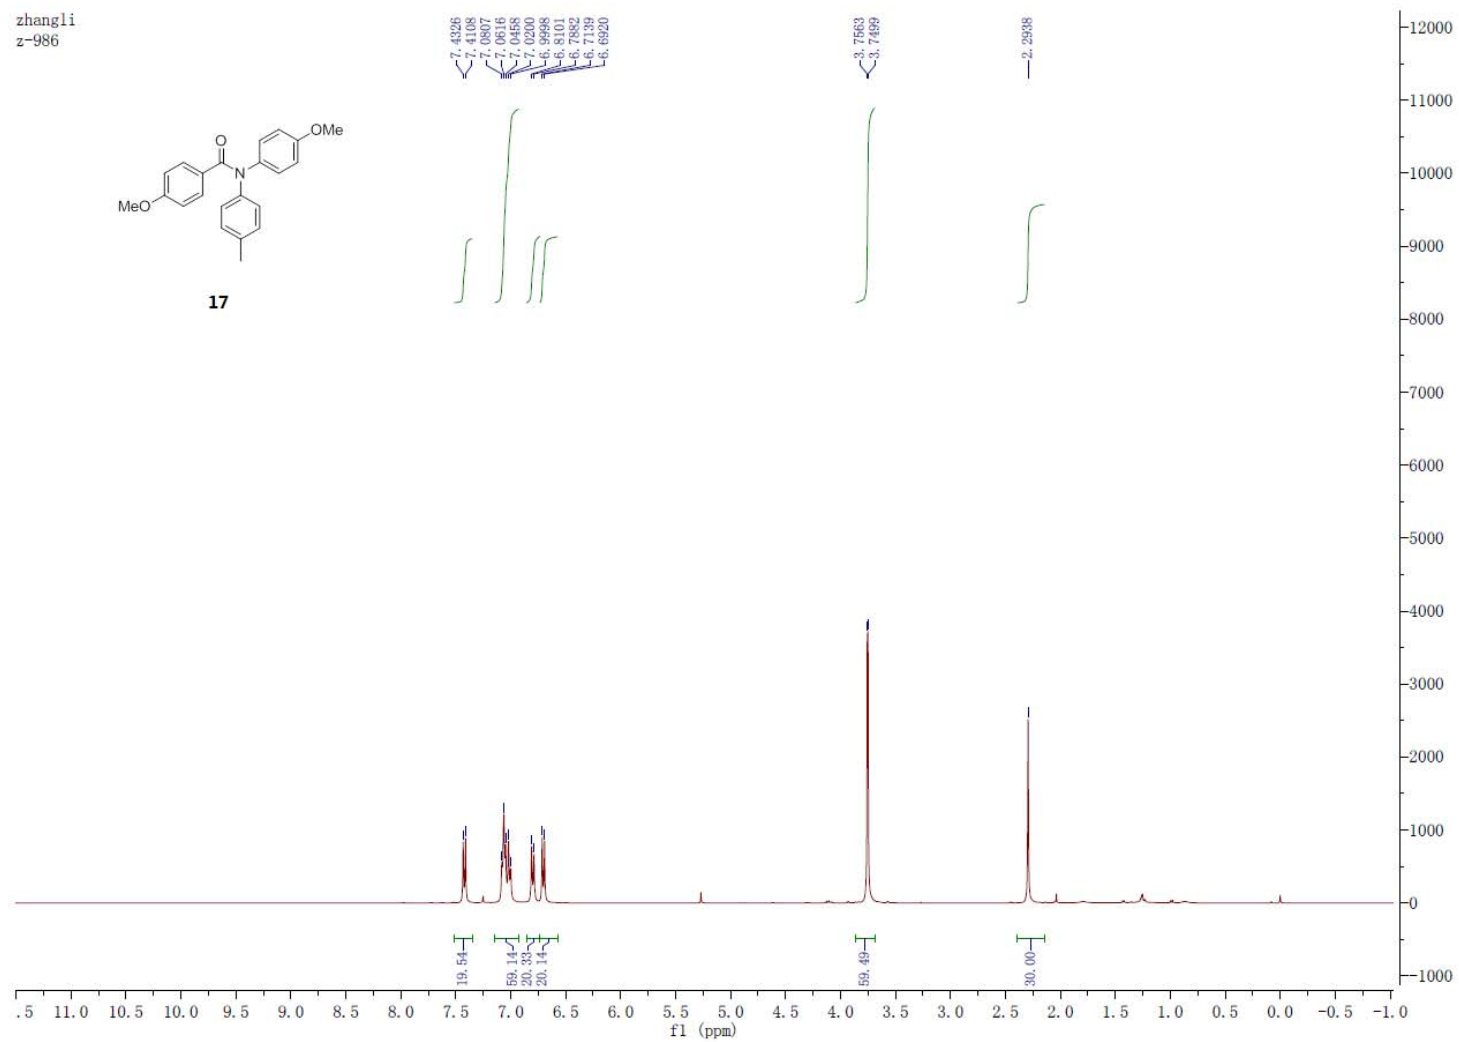

待整理核磁  
z-986C

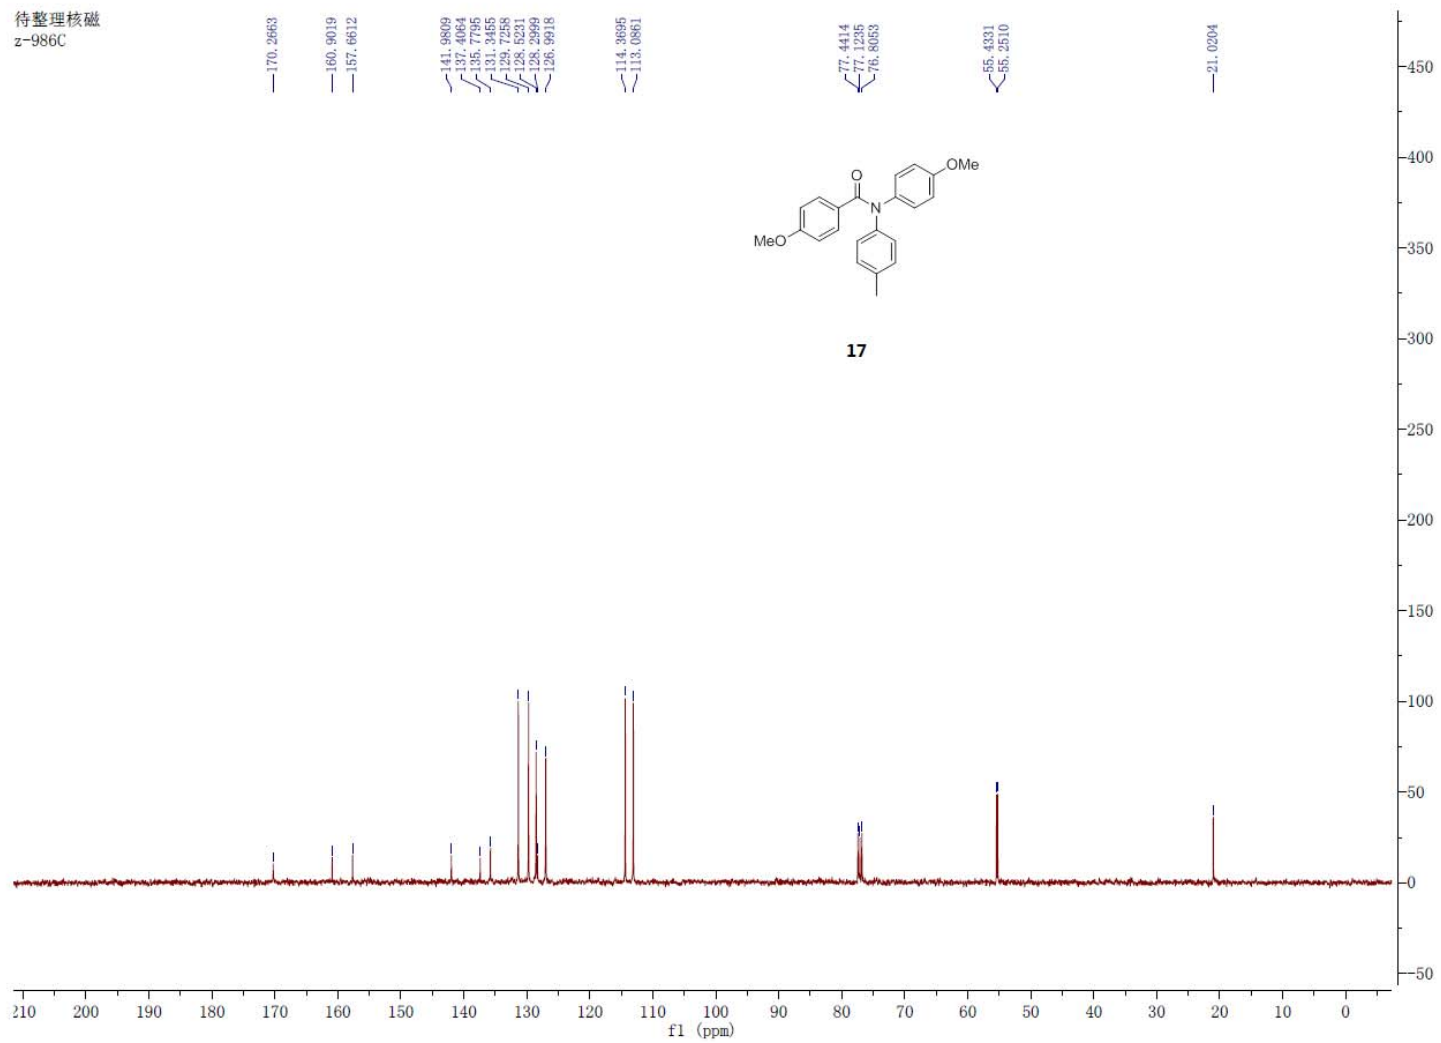

待整理核磁  
z-995H

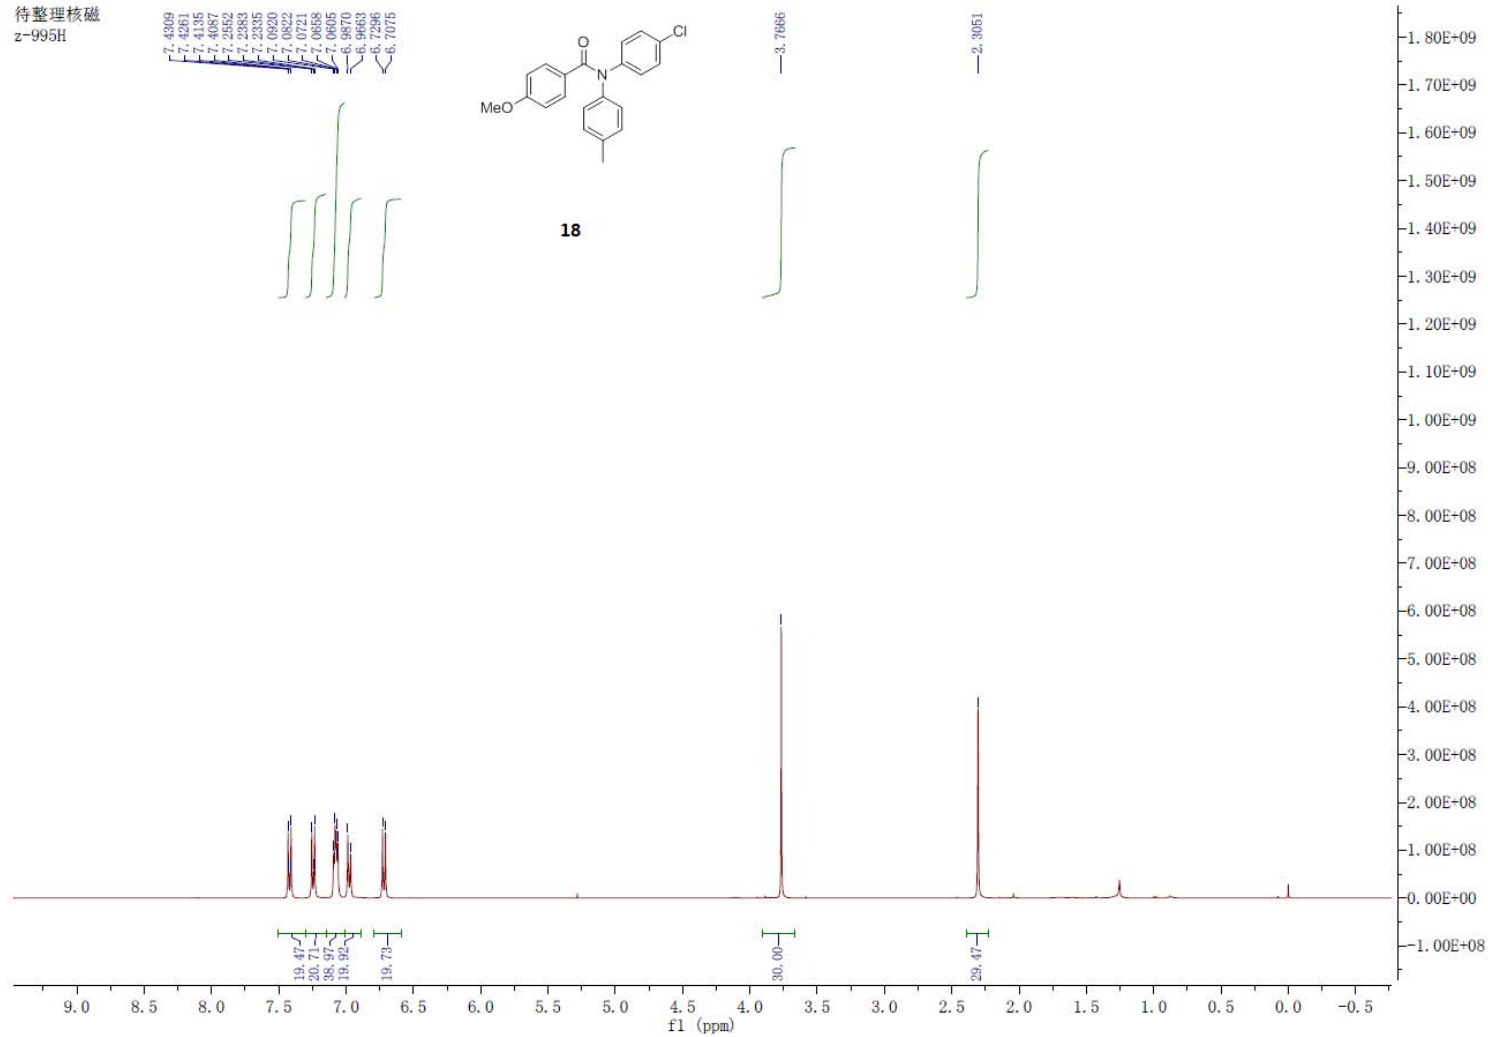

待整理核磁  
z-995C

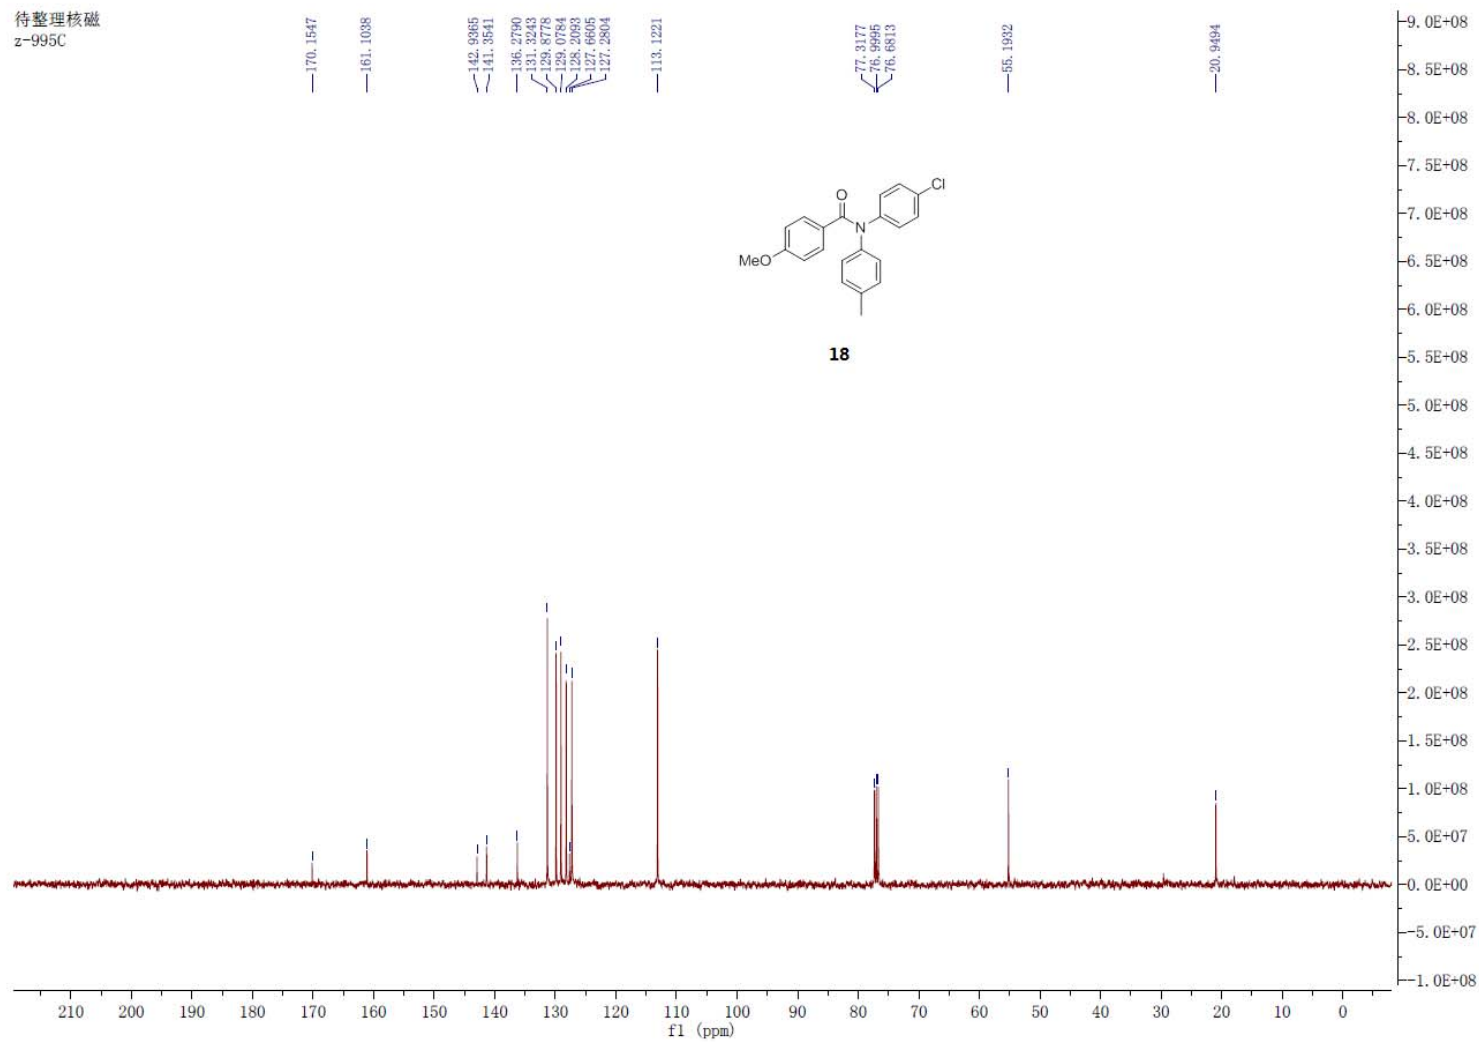

zhangli  
Z-994h

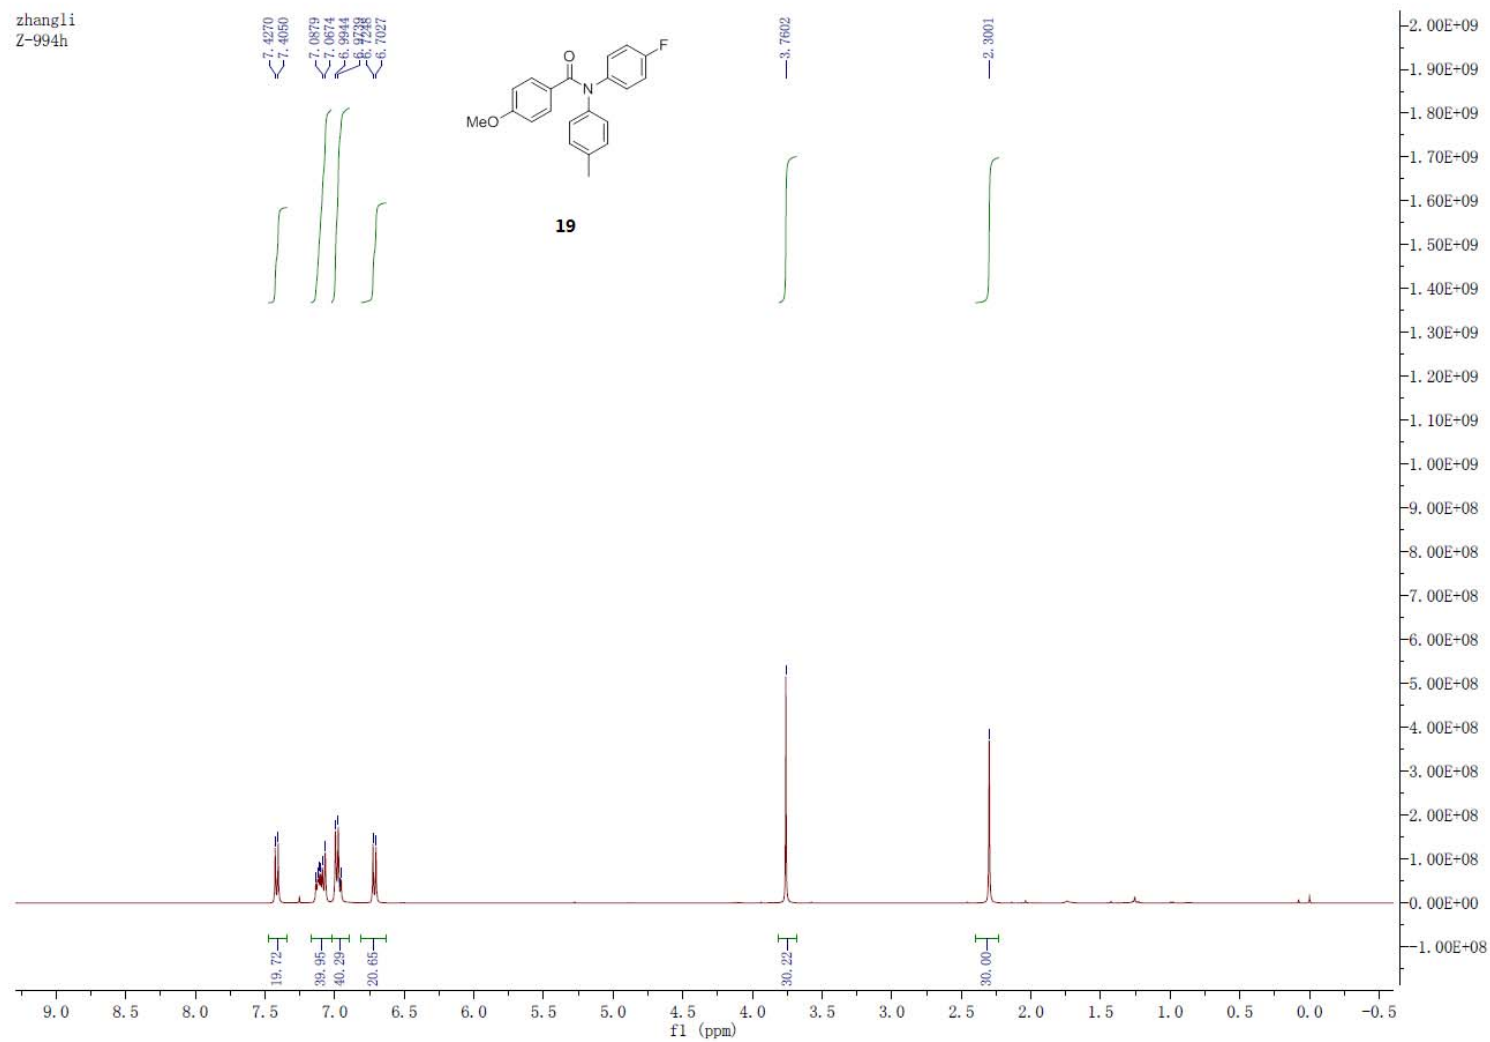



待整理核磁  
z-994C

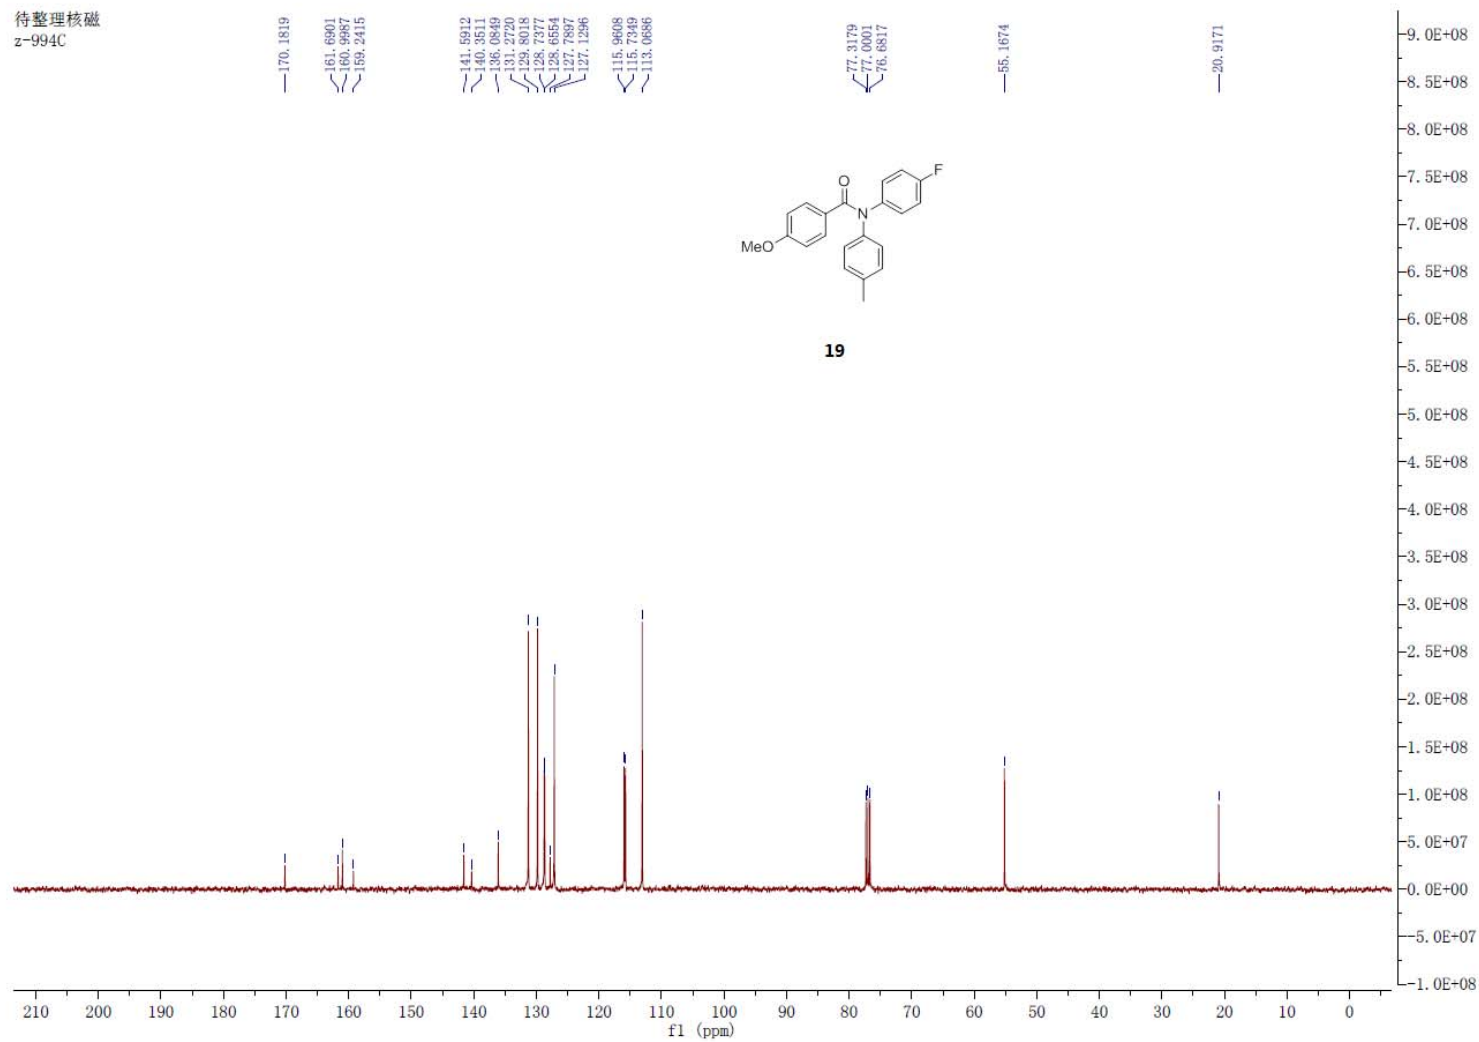

130619  
227-17-1

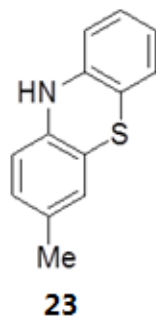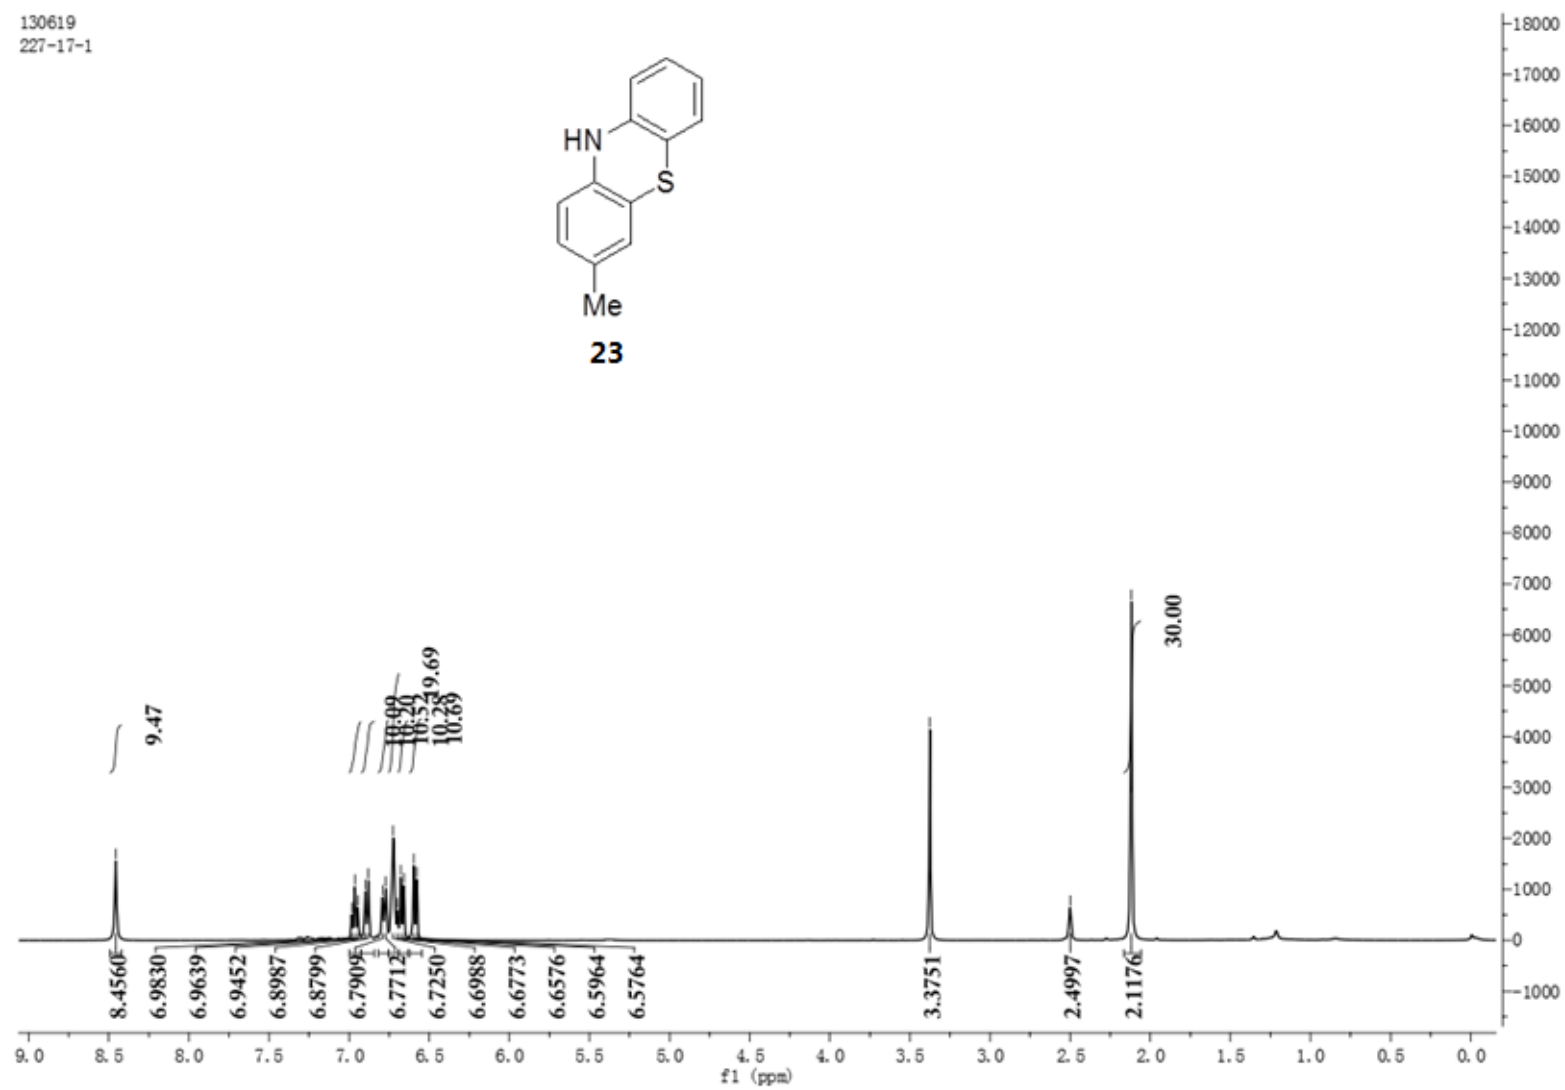

130619  
227-17-1C

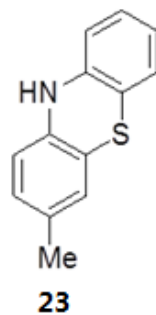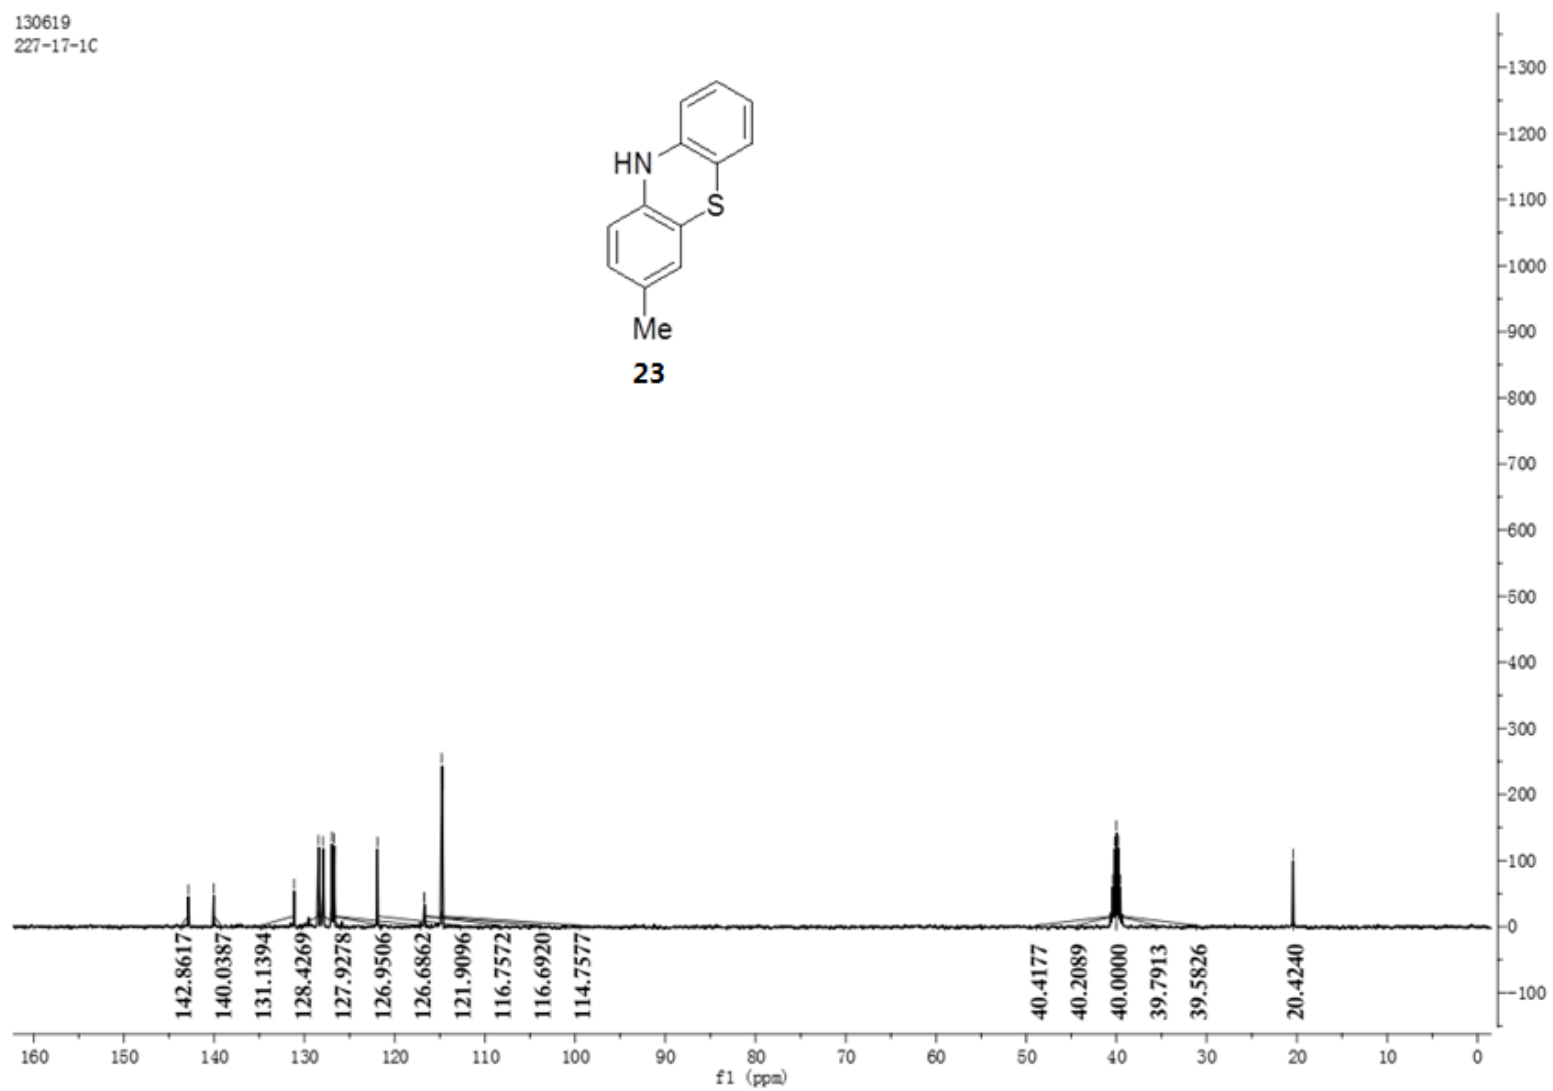

130626  
228-11-1

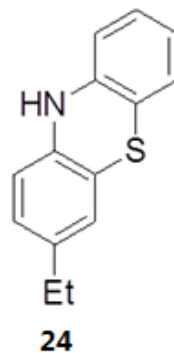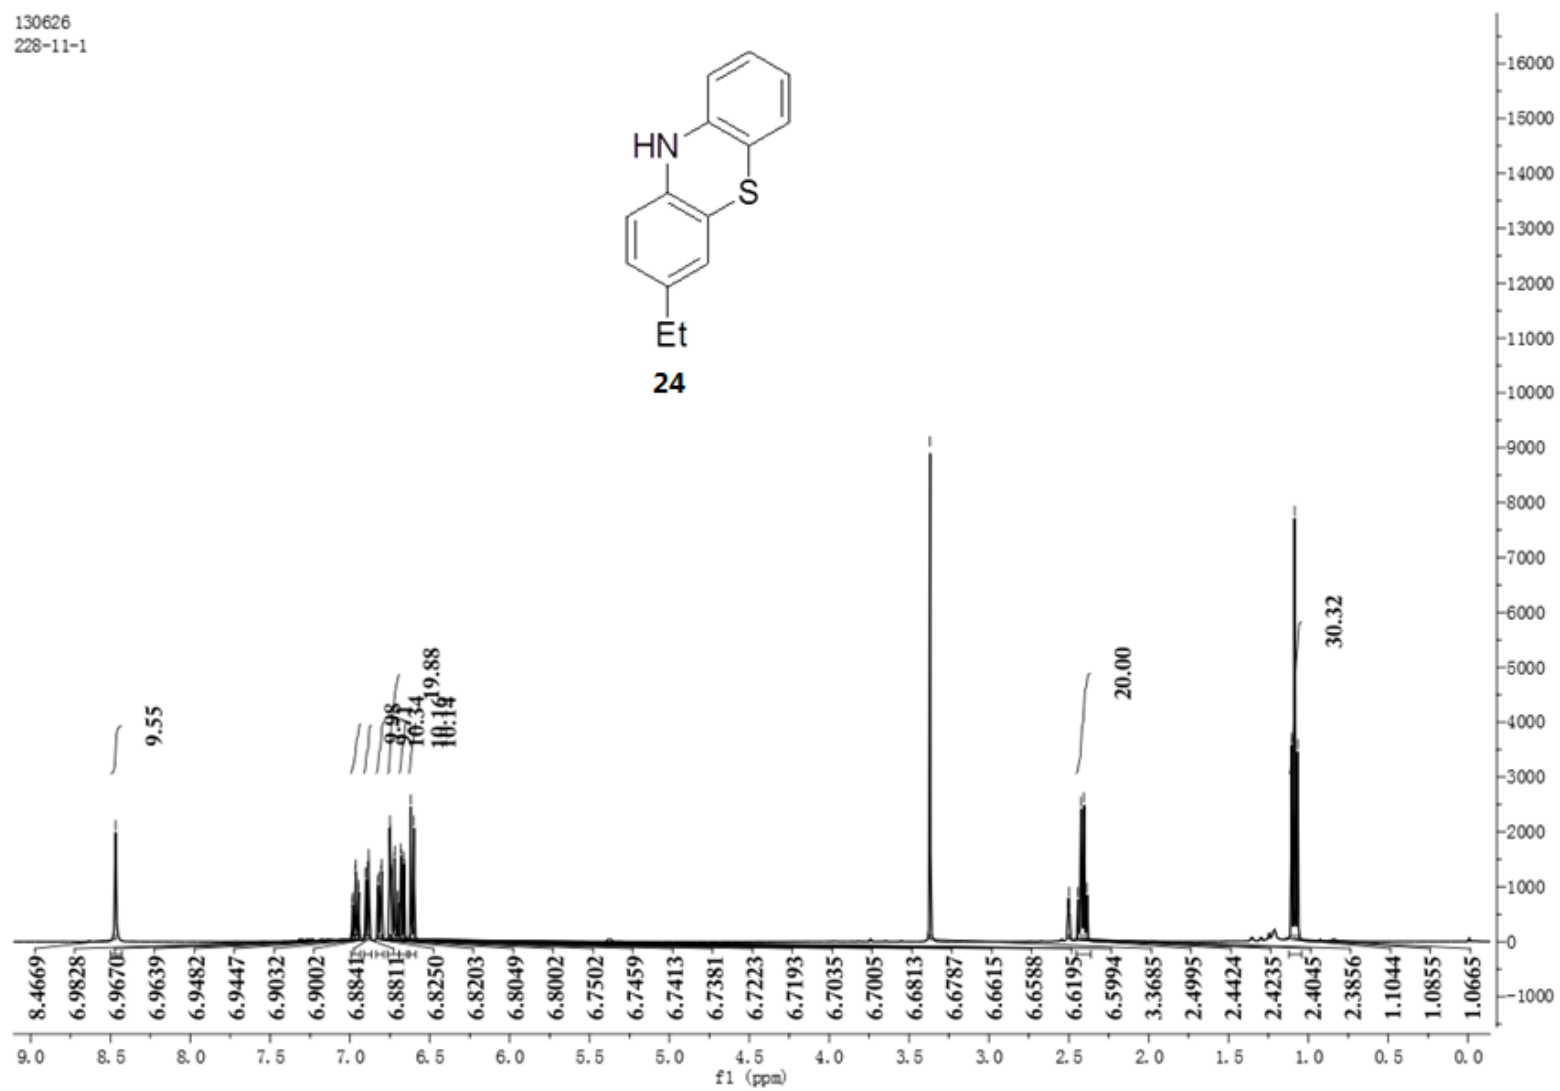

130626  
228-11-1C

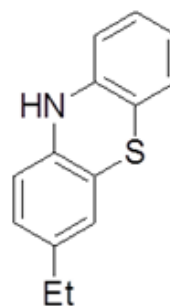

**24**

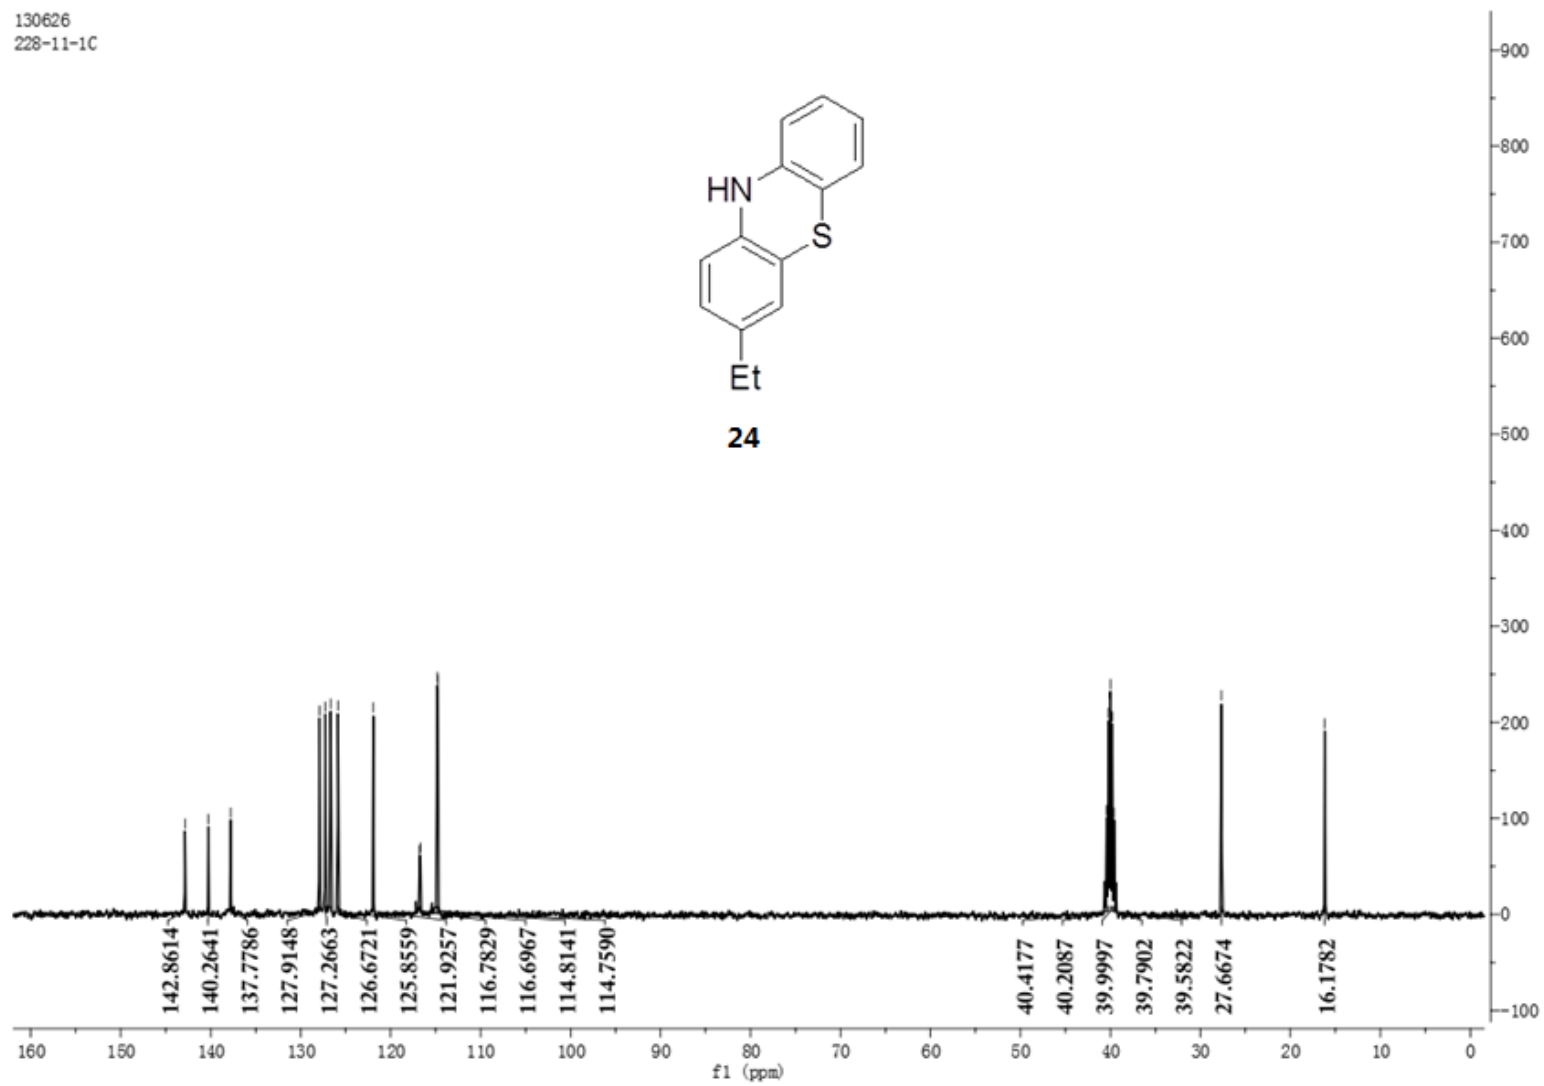

130626  
228-10-1

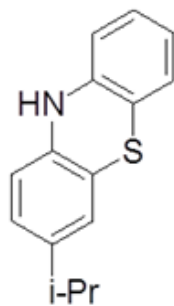

25

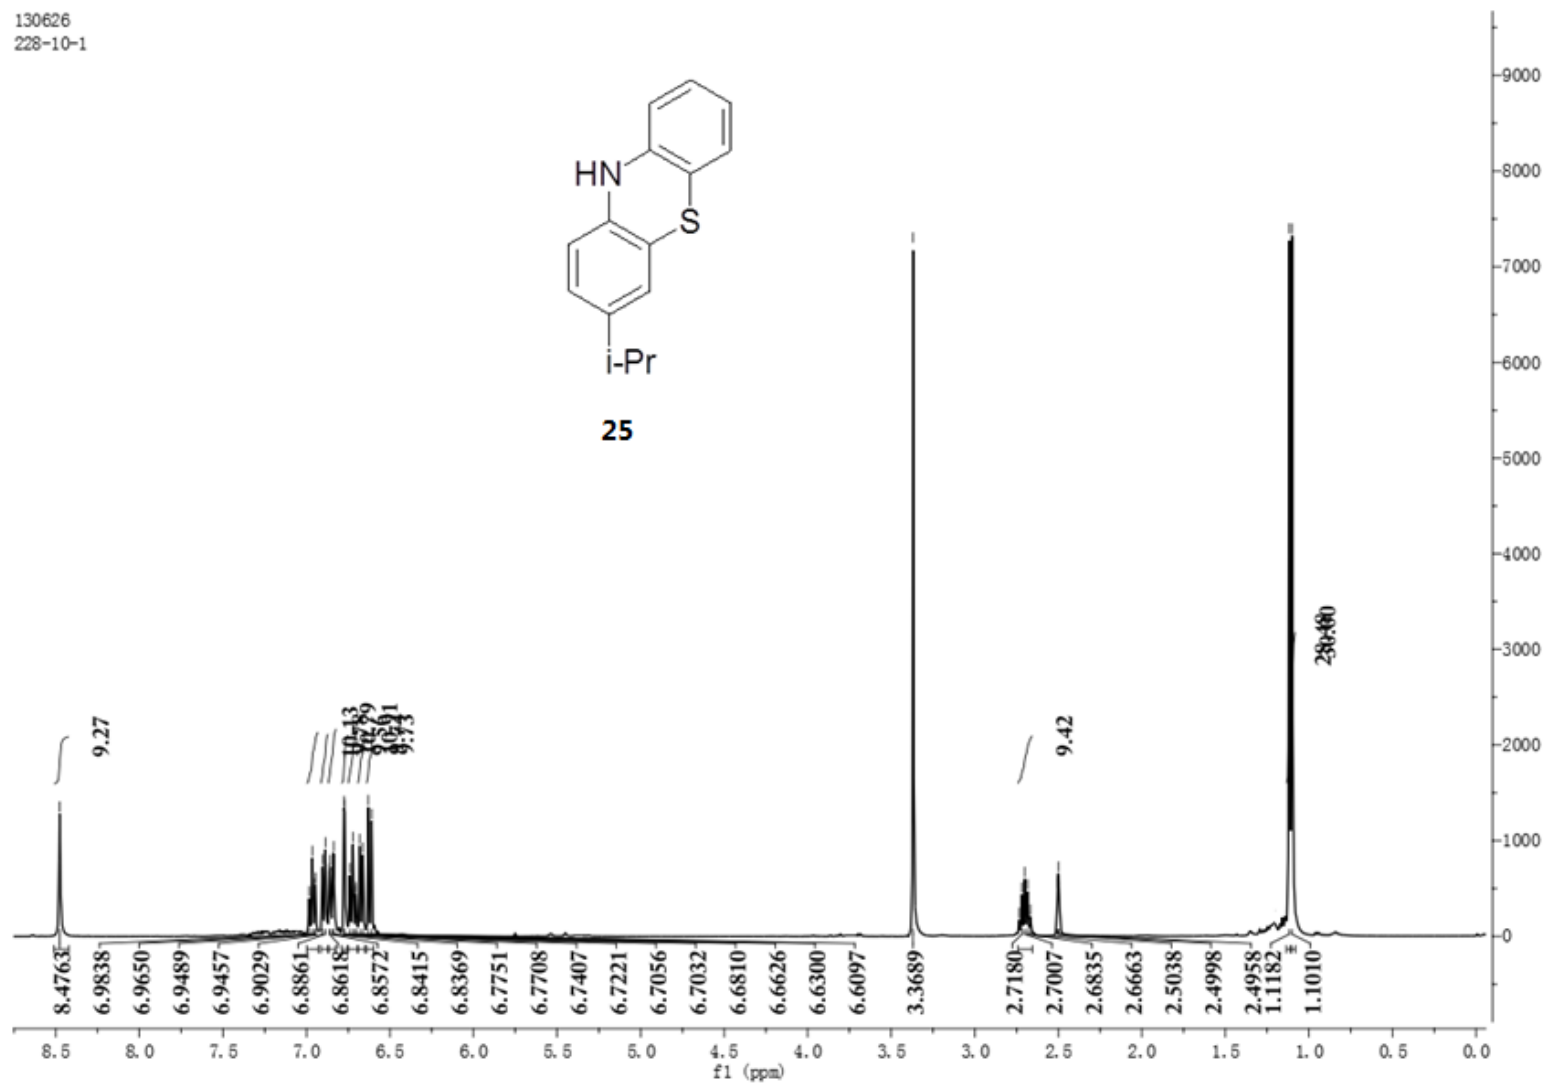

130626  
228-10-1C

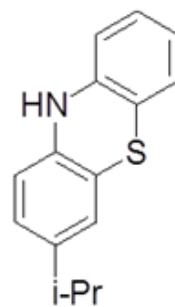

25

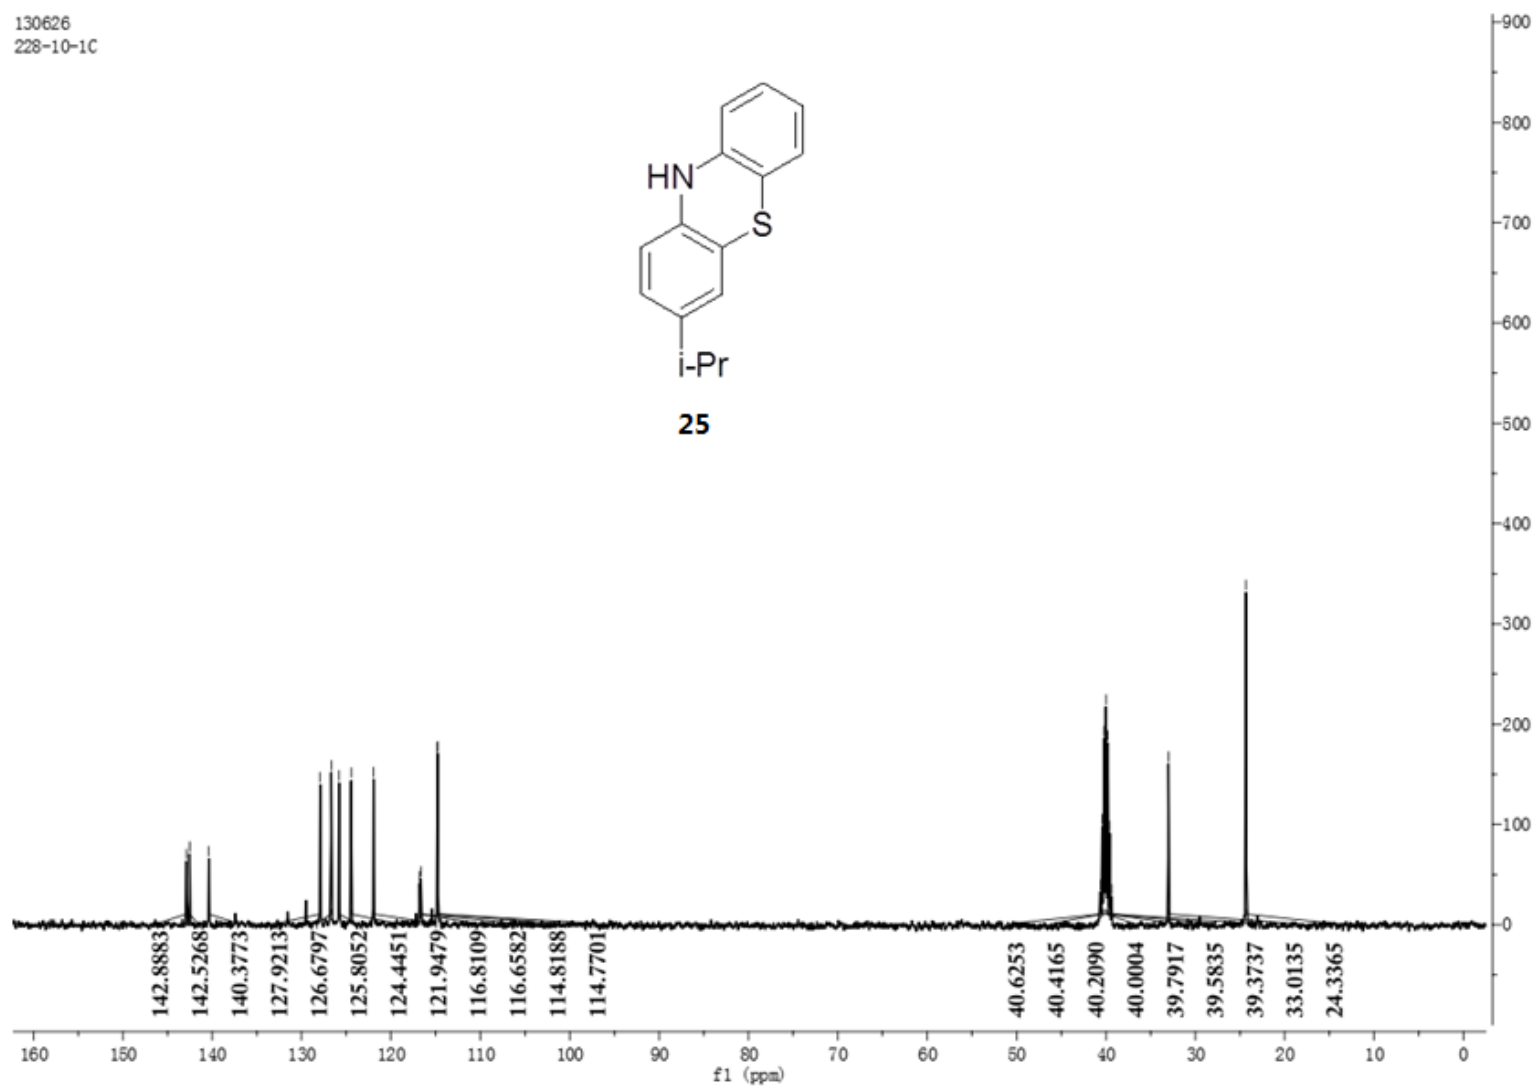

130913  
241-4-1

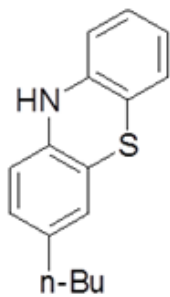

26

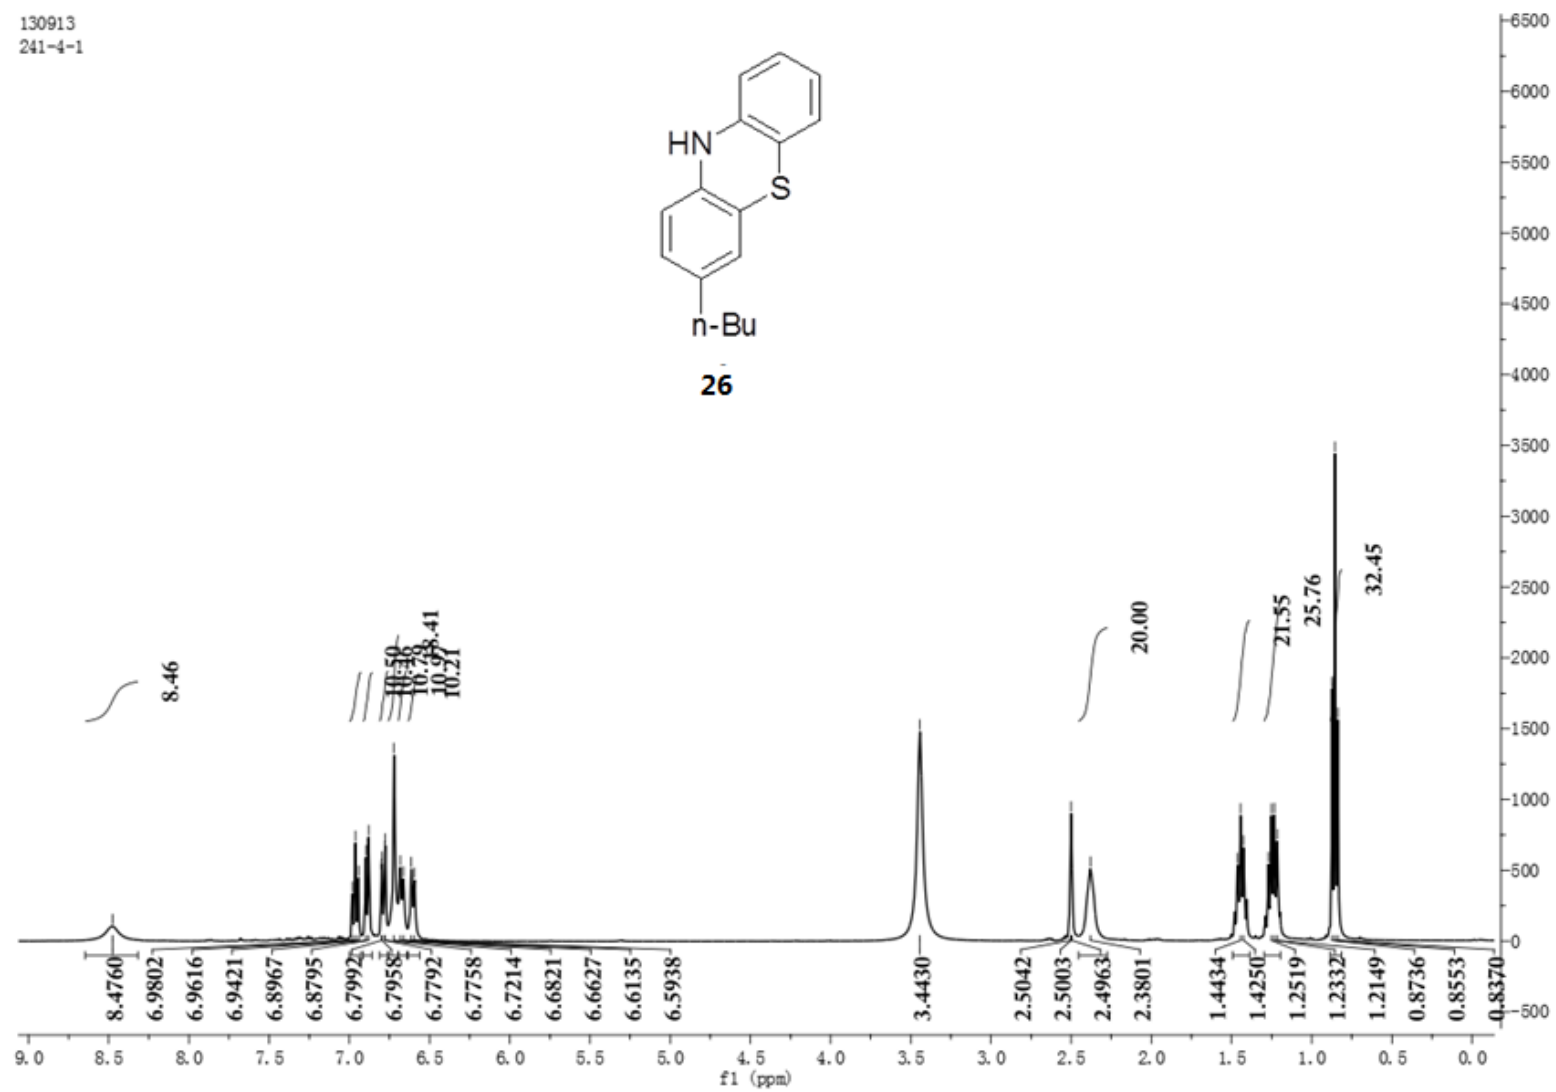



130913  
241-4-1C

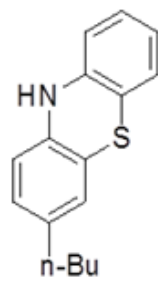

26

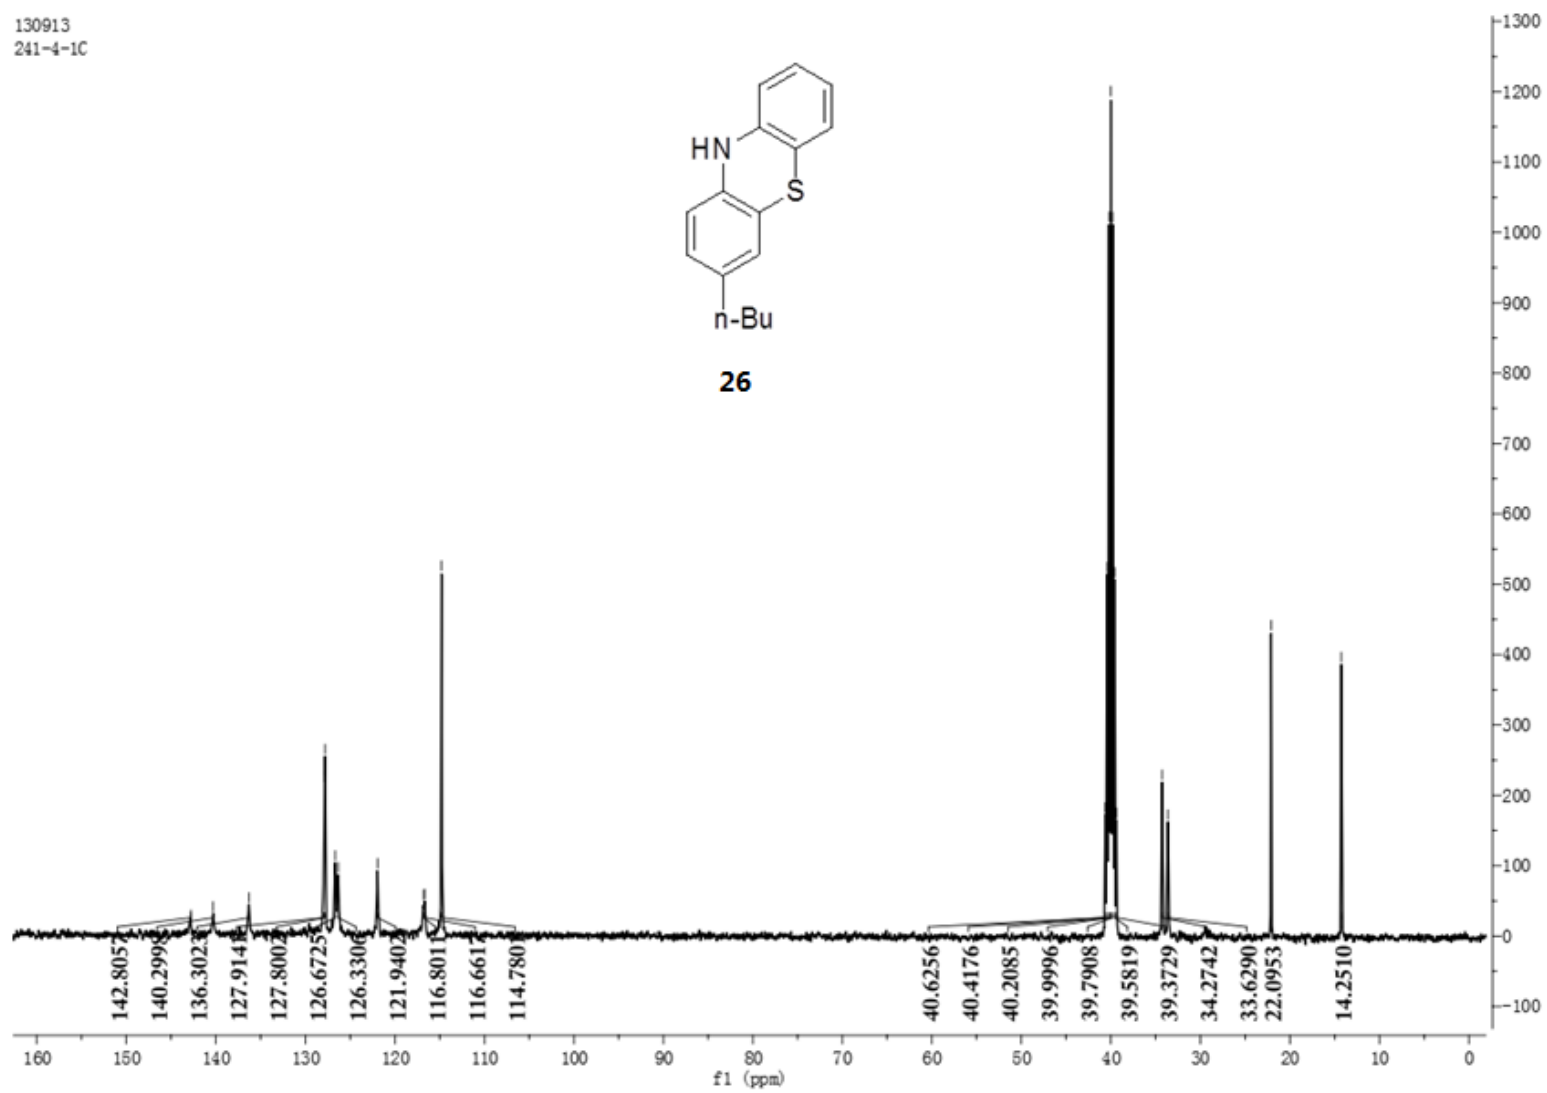

130619  
228-4-1

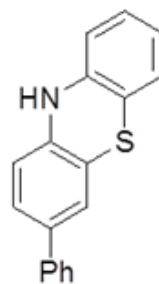

27

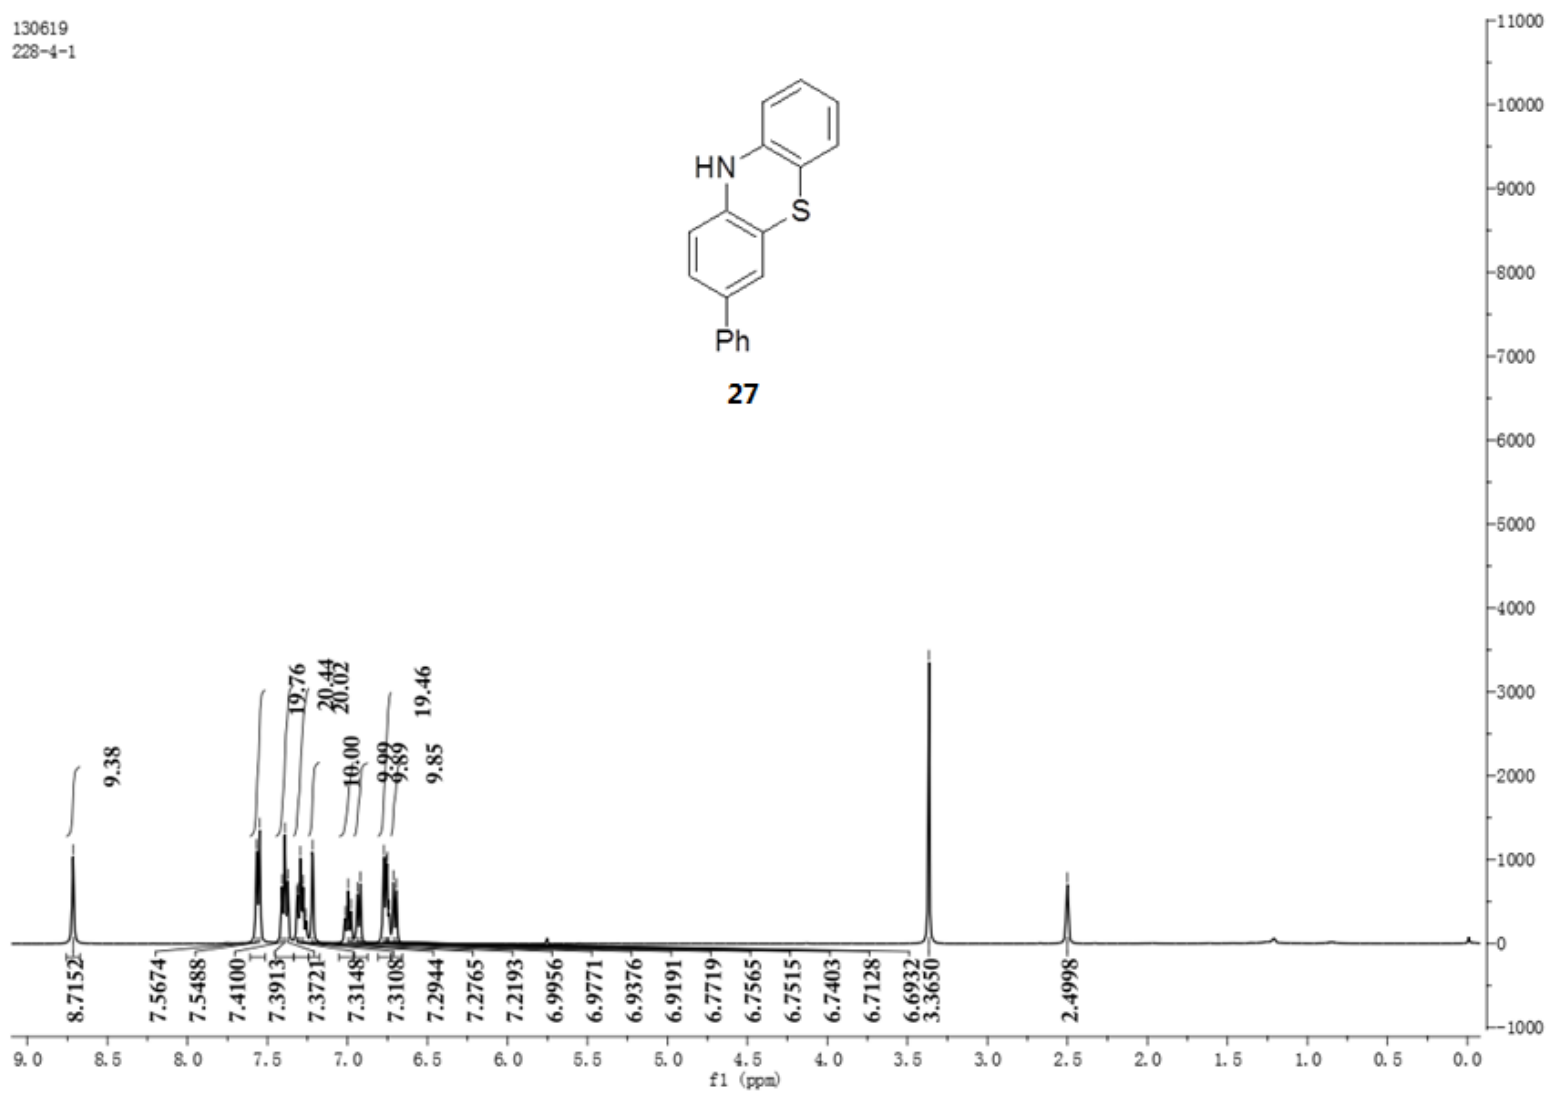

130619  
228-4-1C

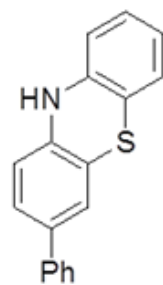

**27**

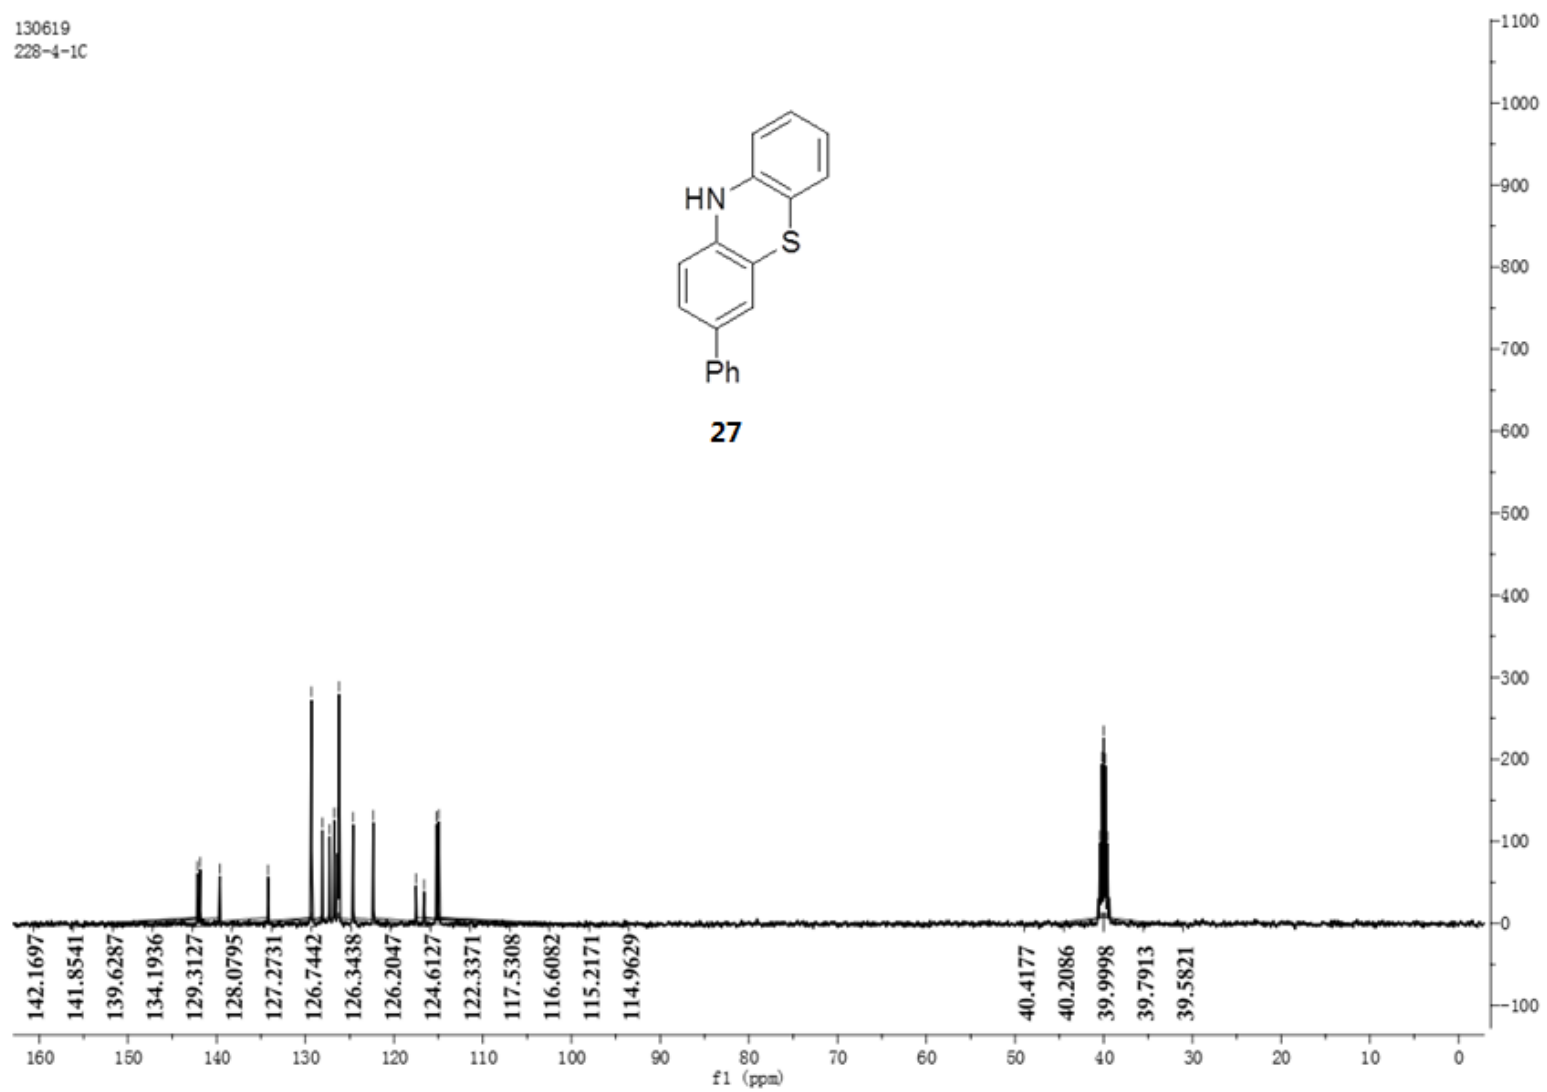

130718  
228-9-1

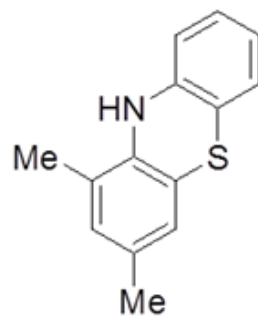

28

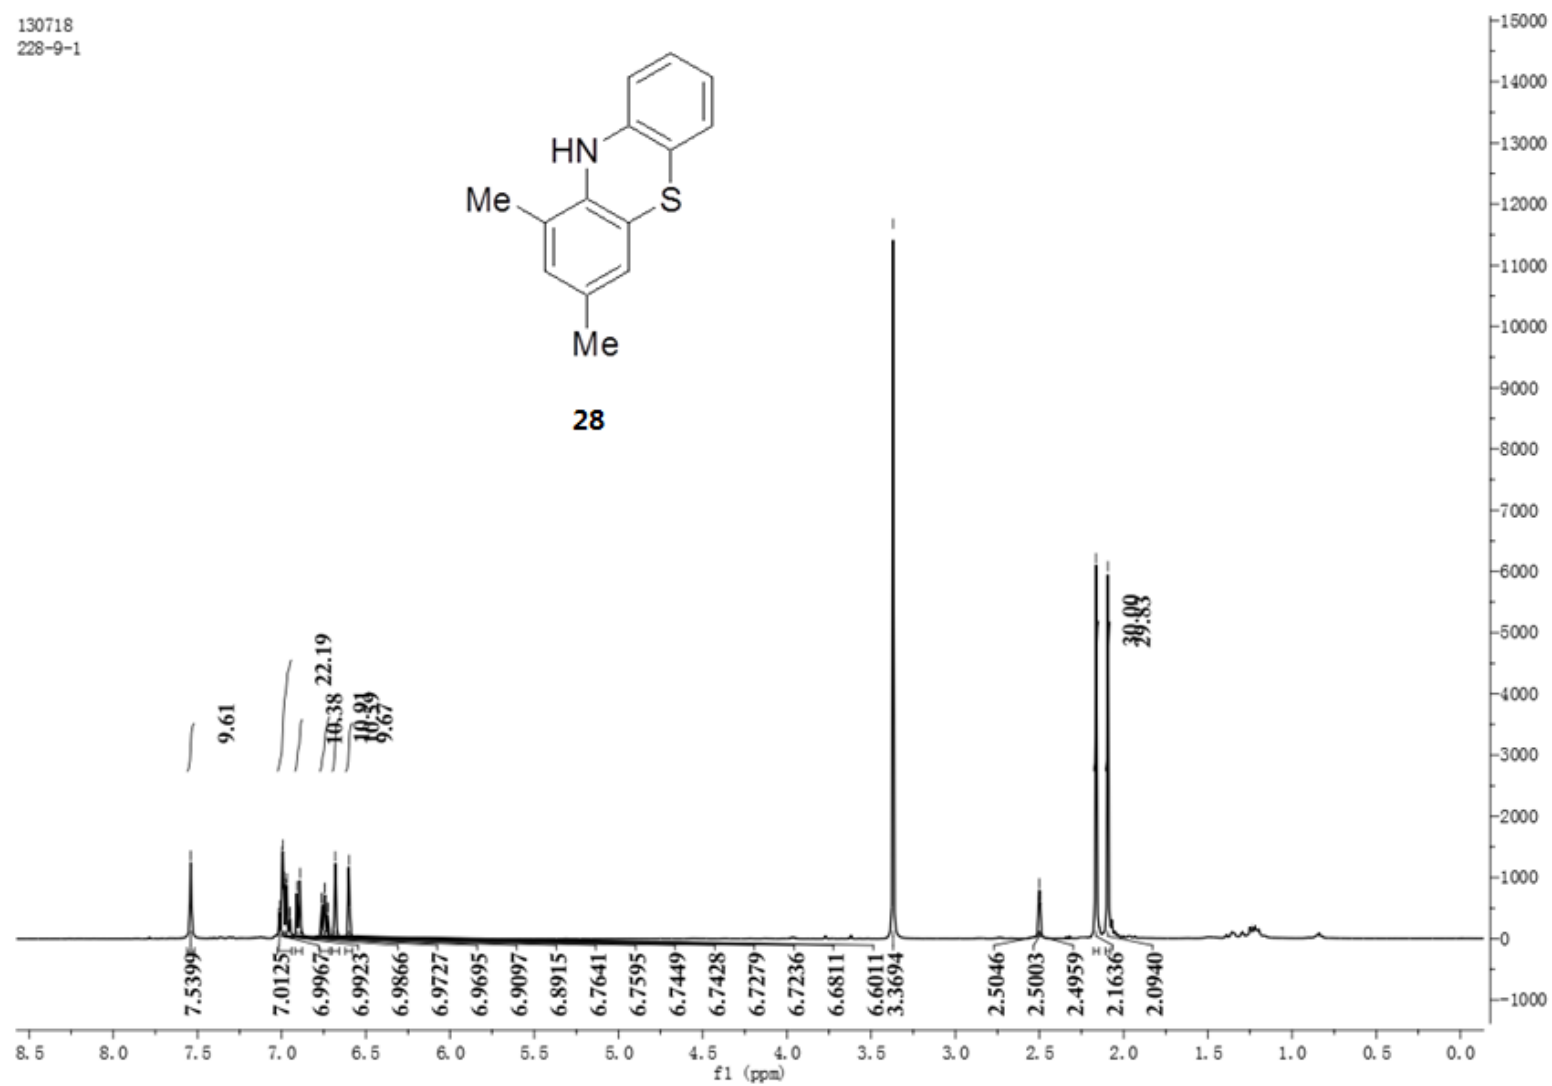

130718  
228-9-1C

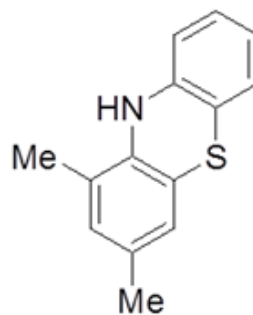

28

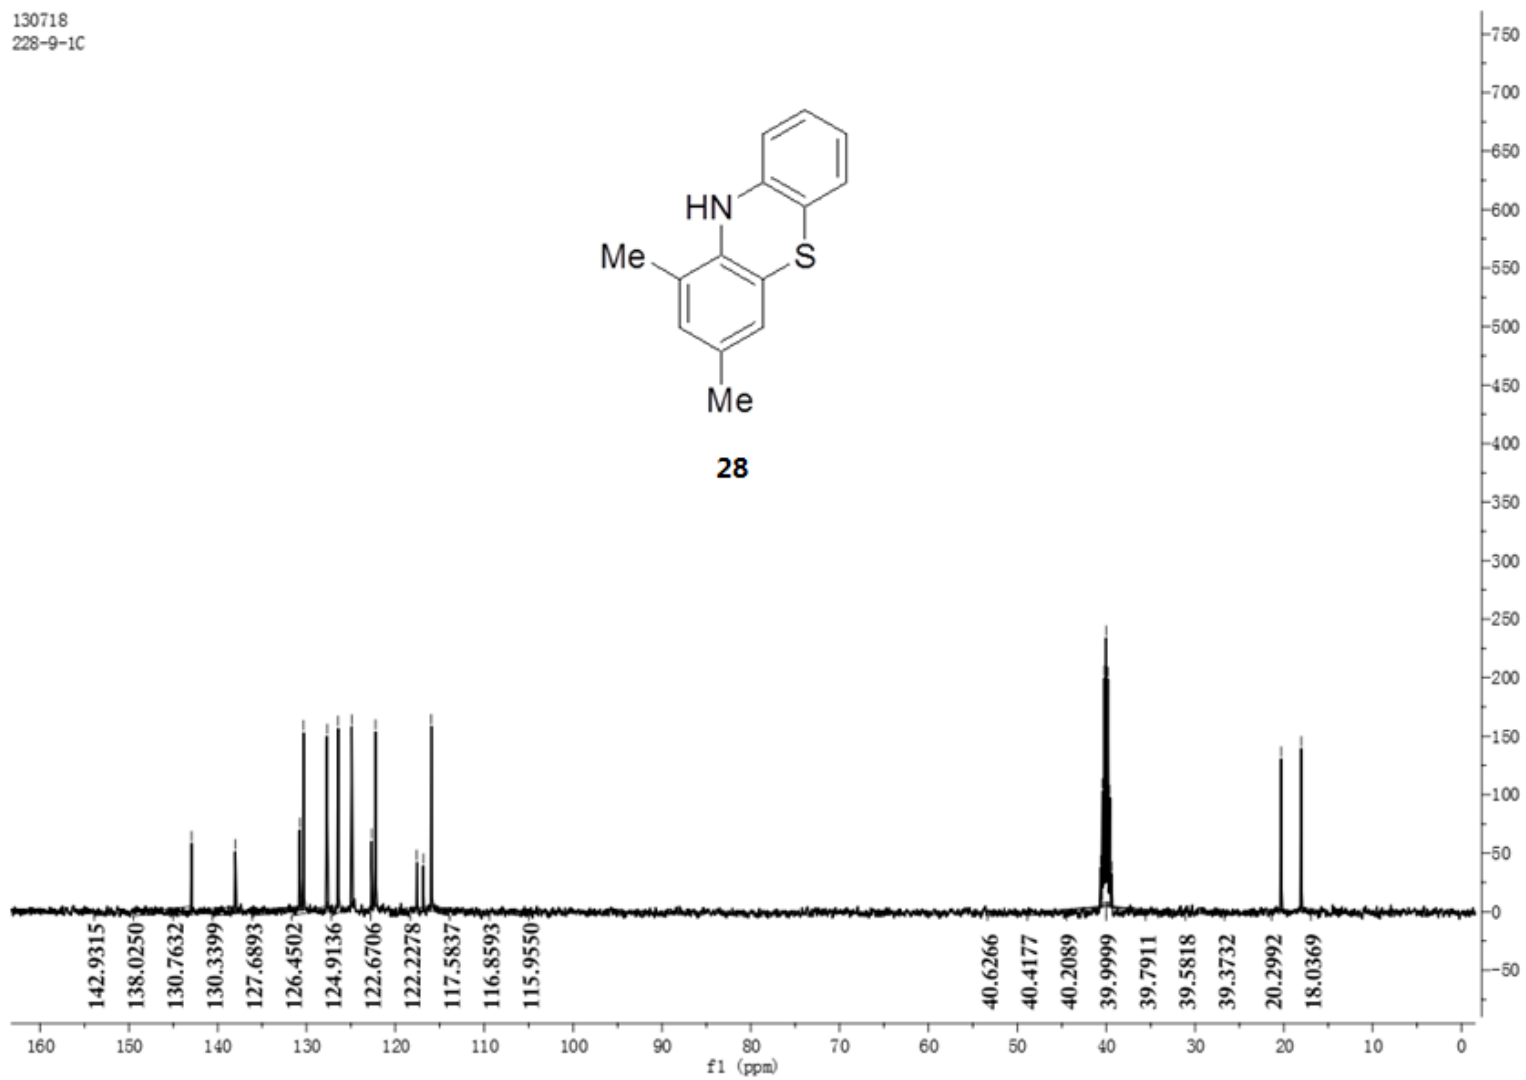

131106  
228-2-1

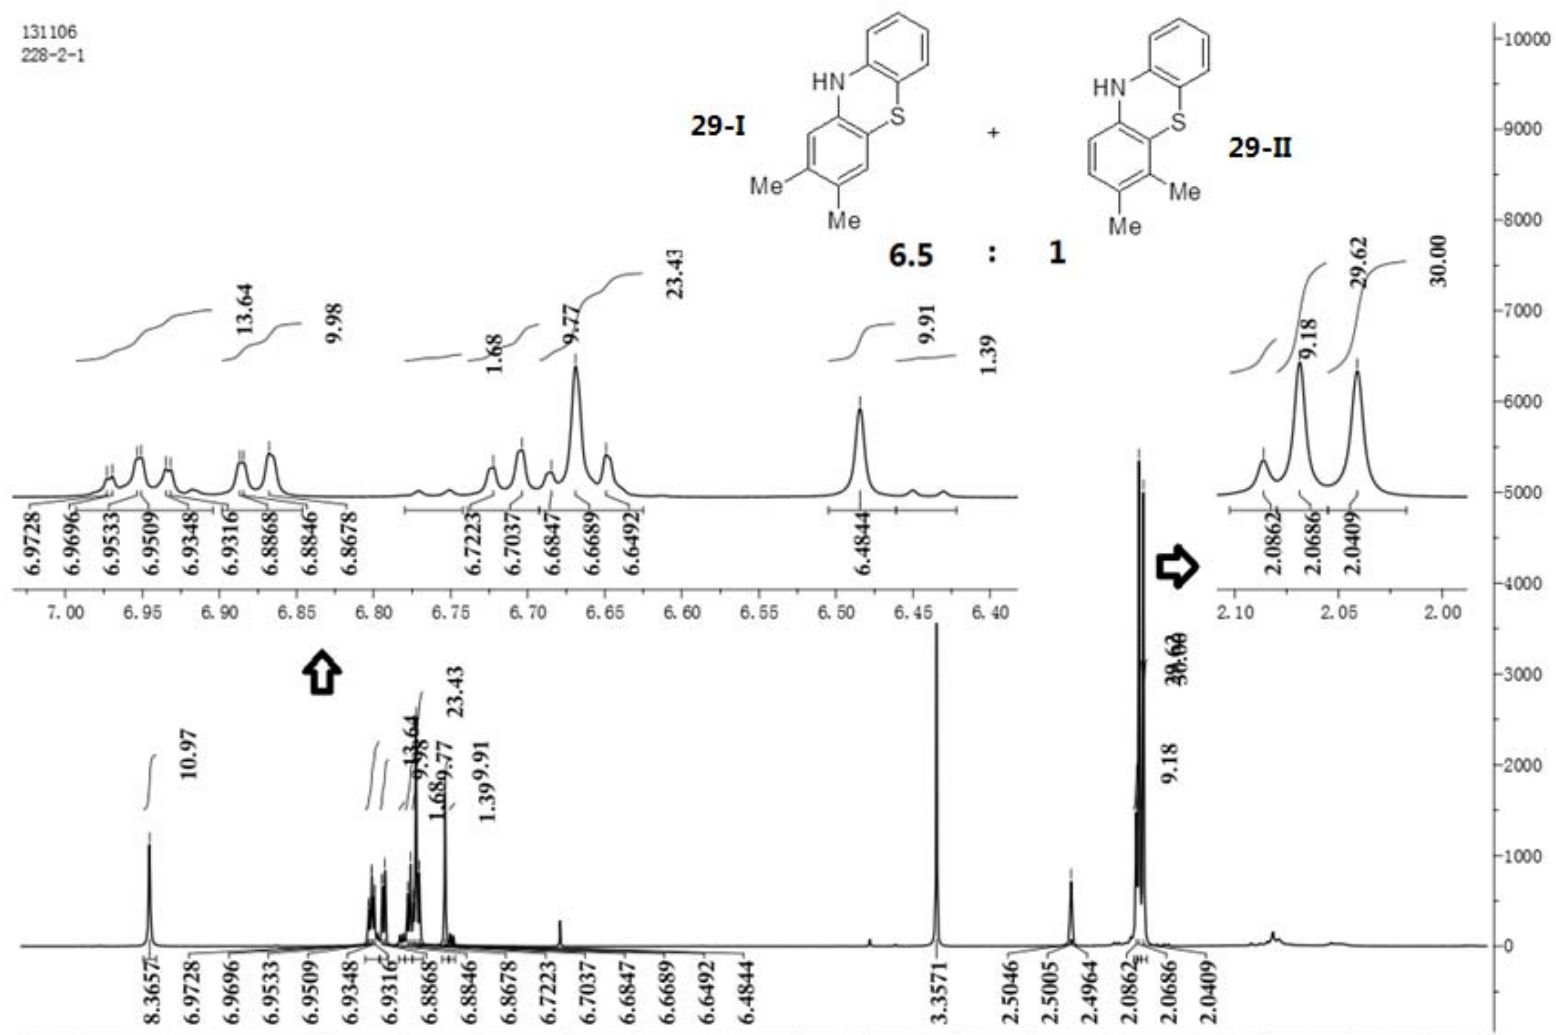

130708  
229-2-1

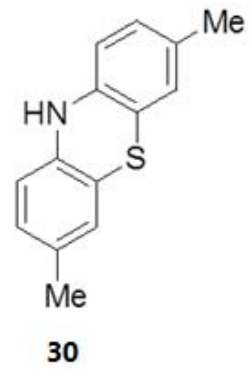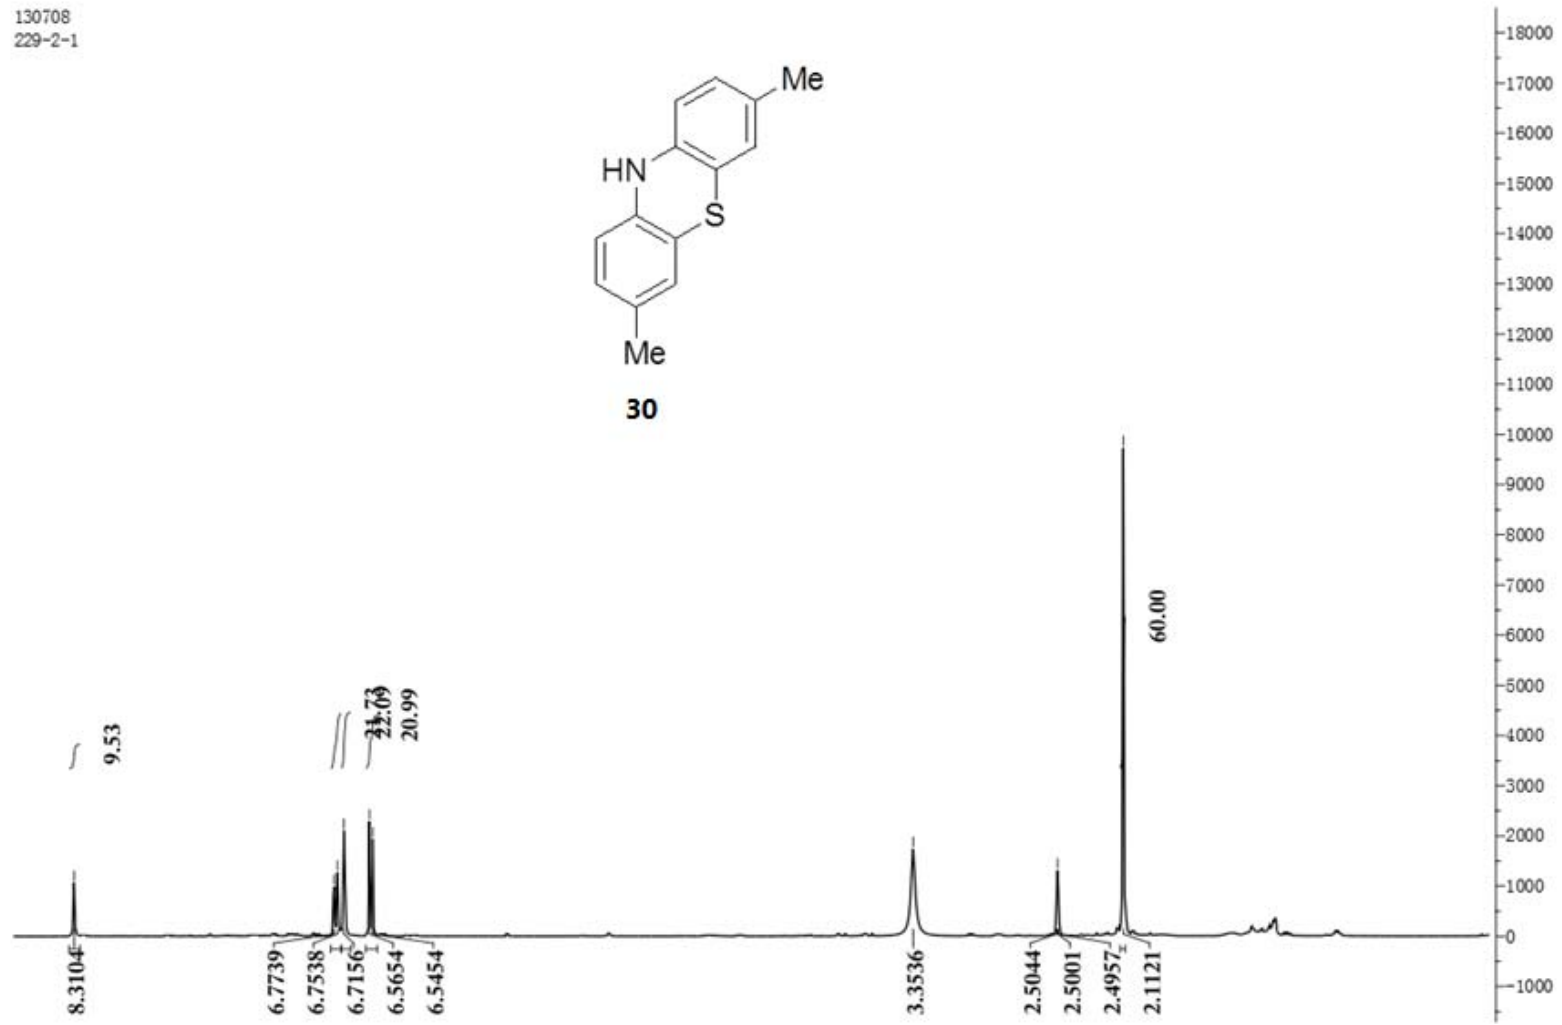

130708  
229-2-1C

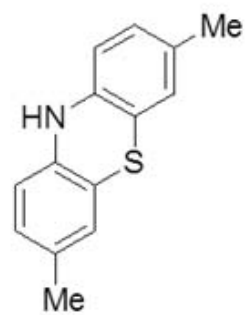

30

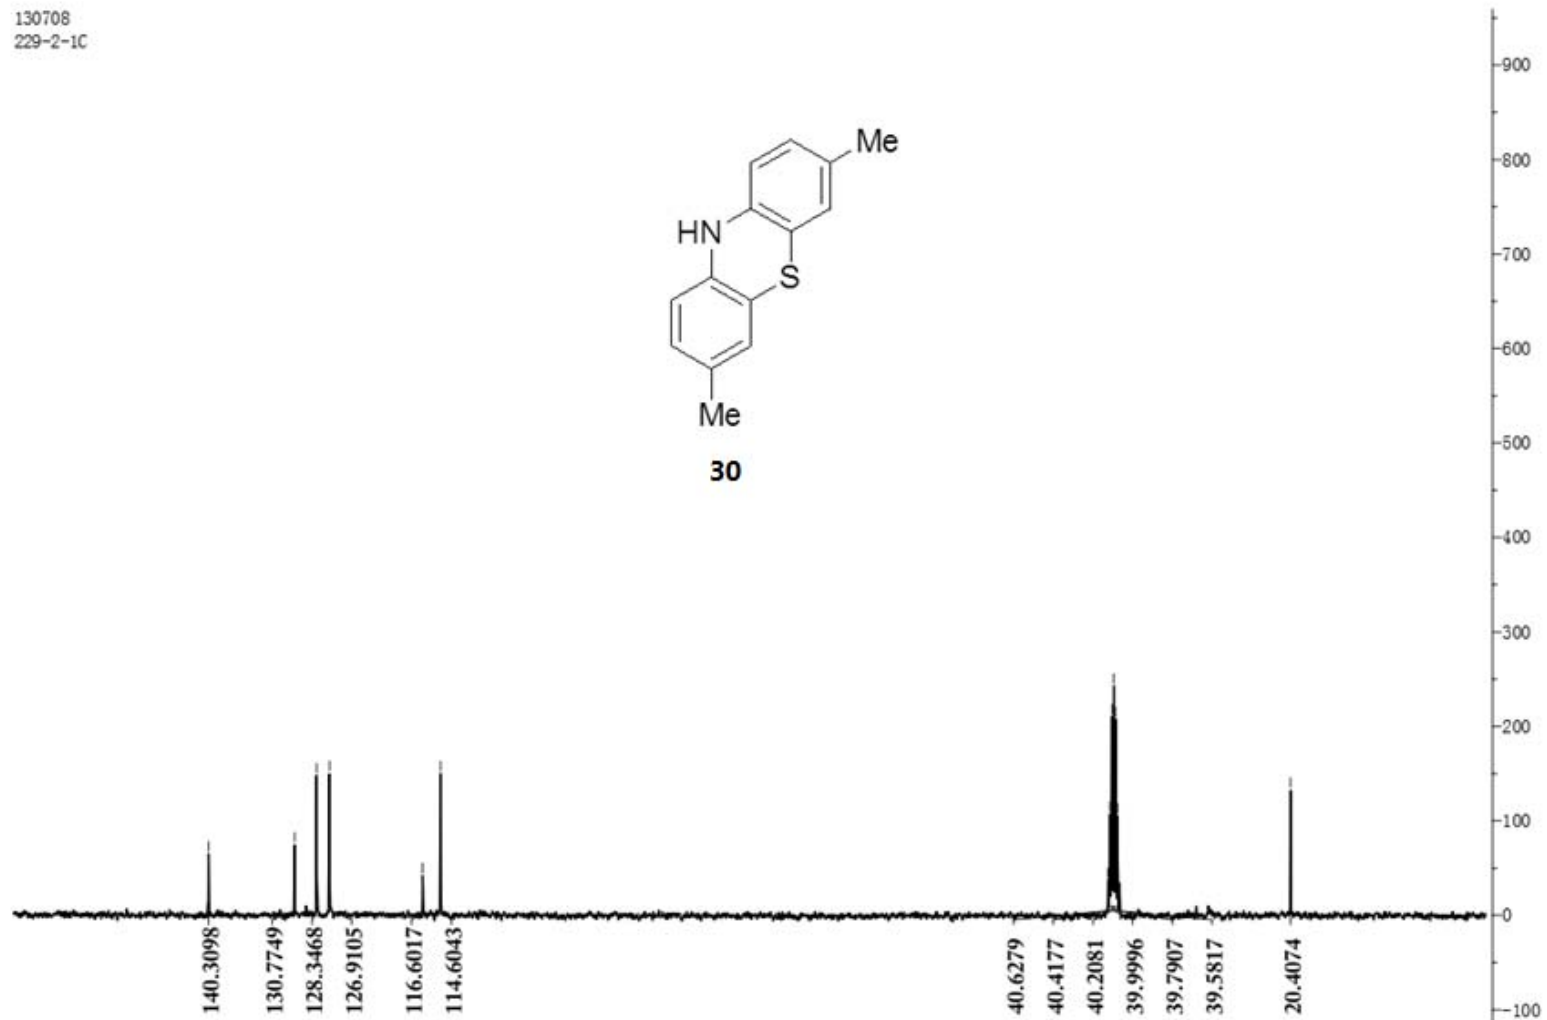



131023  
254-8-1

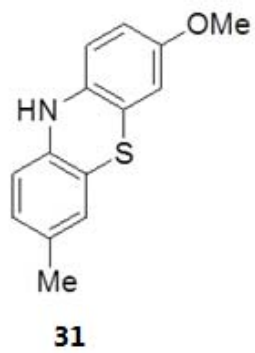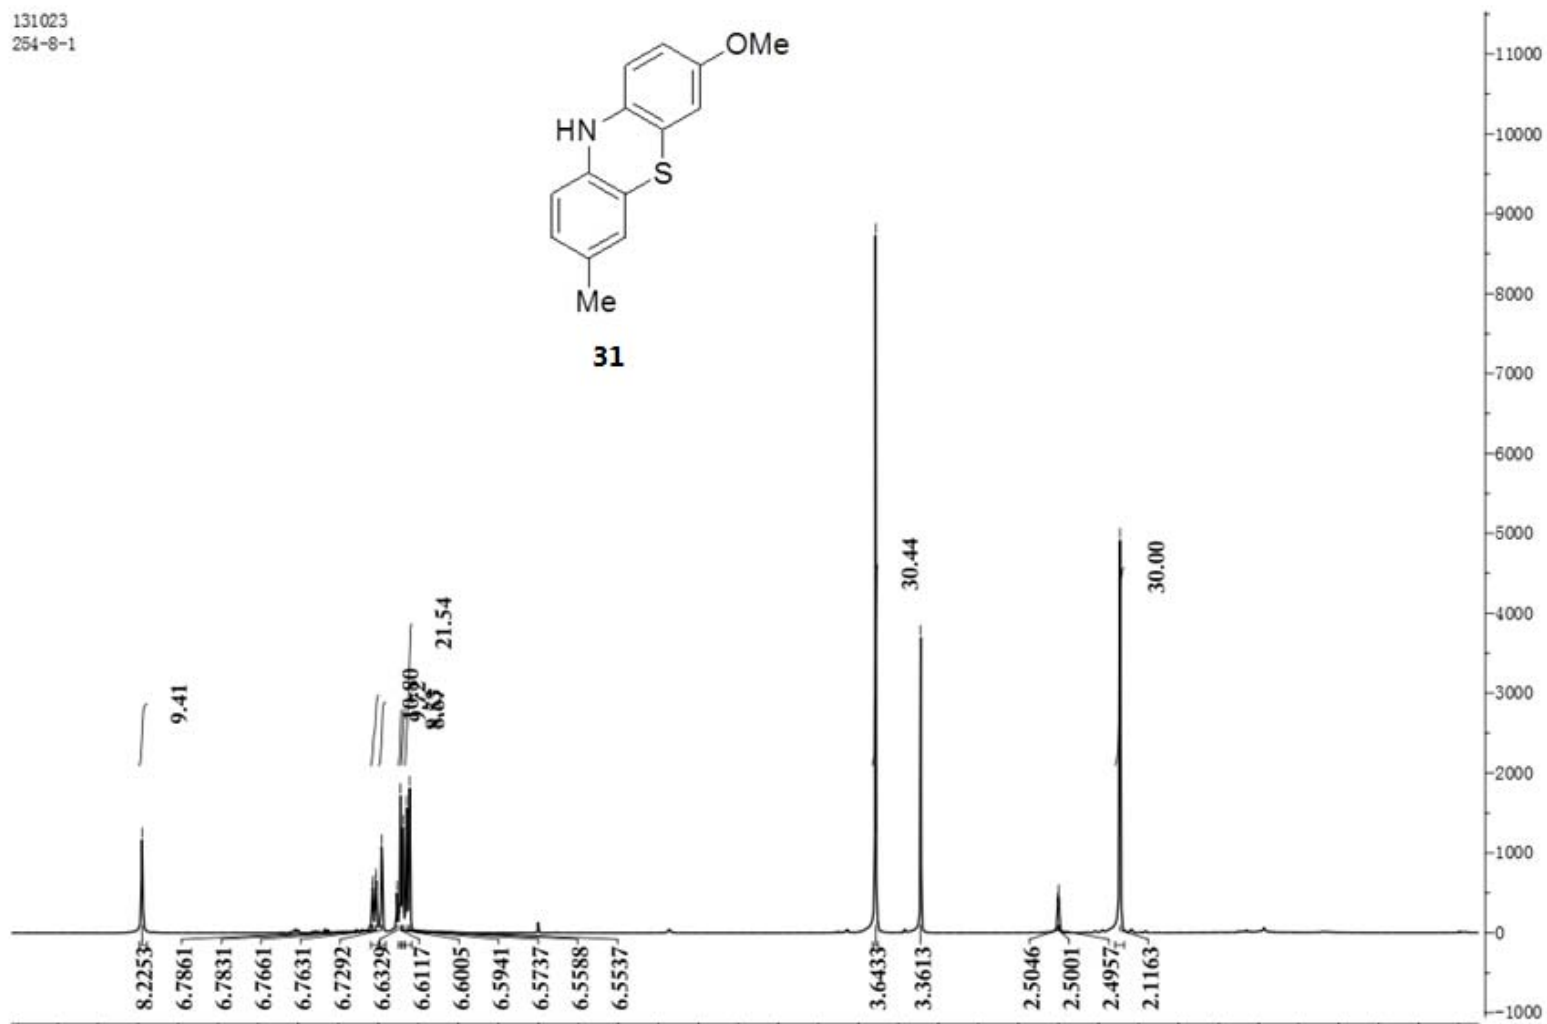

131023  
254-8-1-C

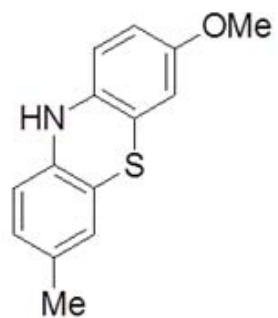

31

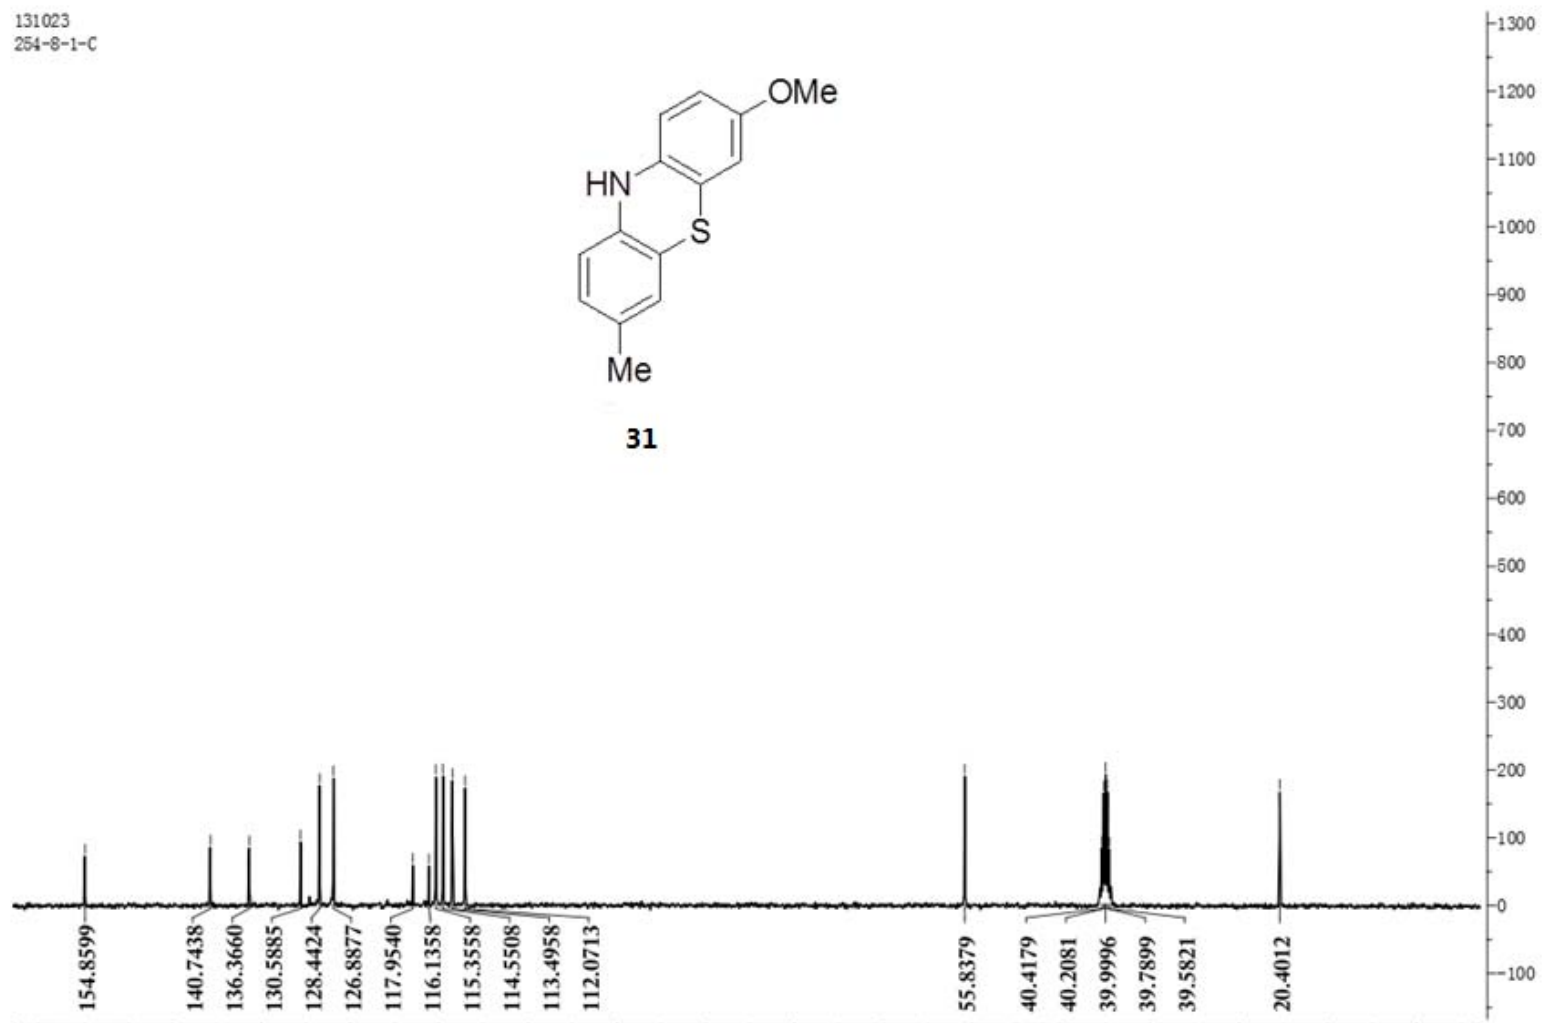

130712  
229-3-1

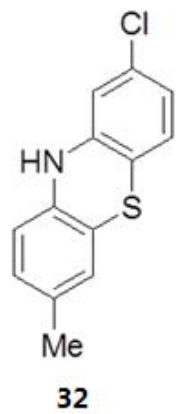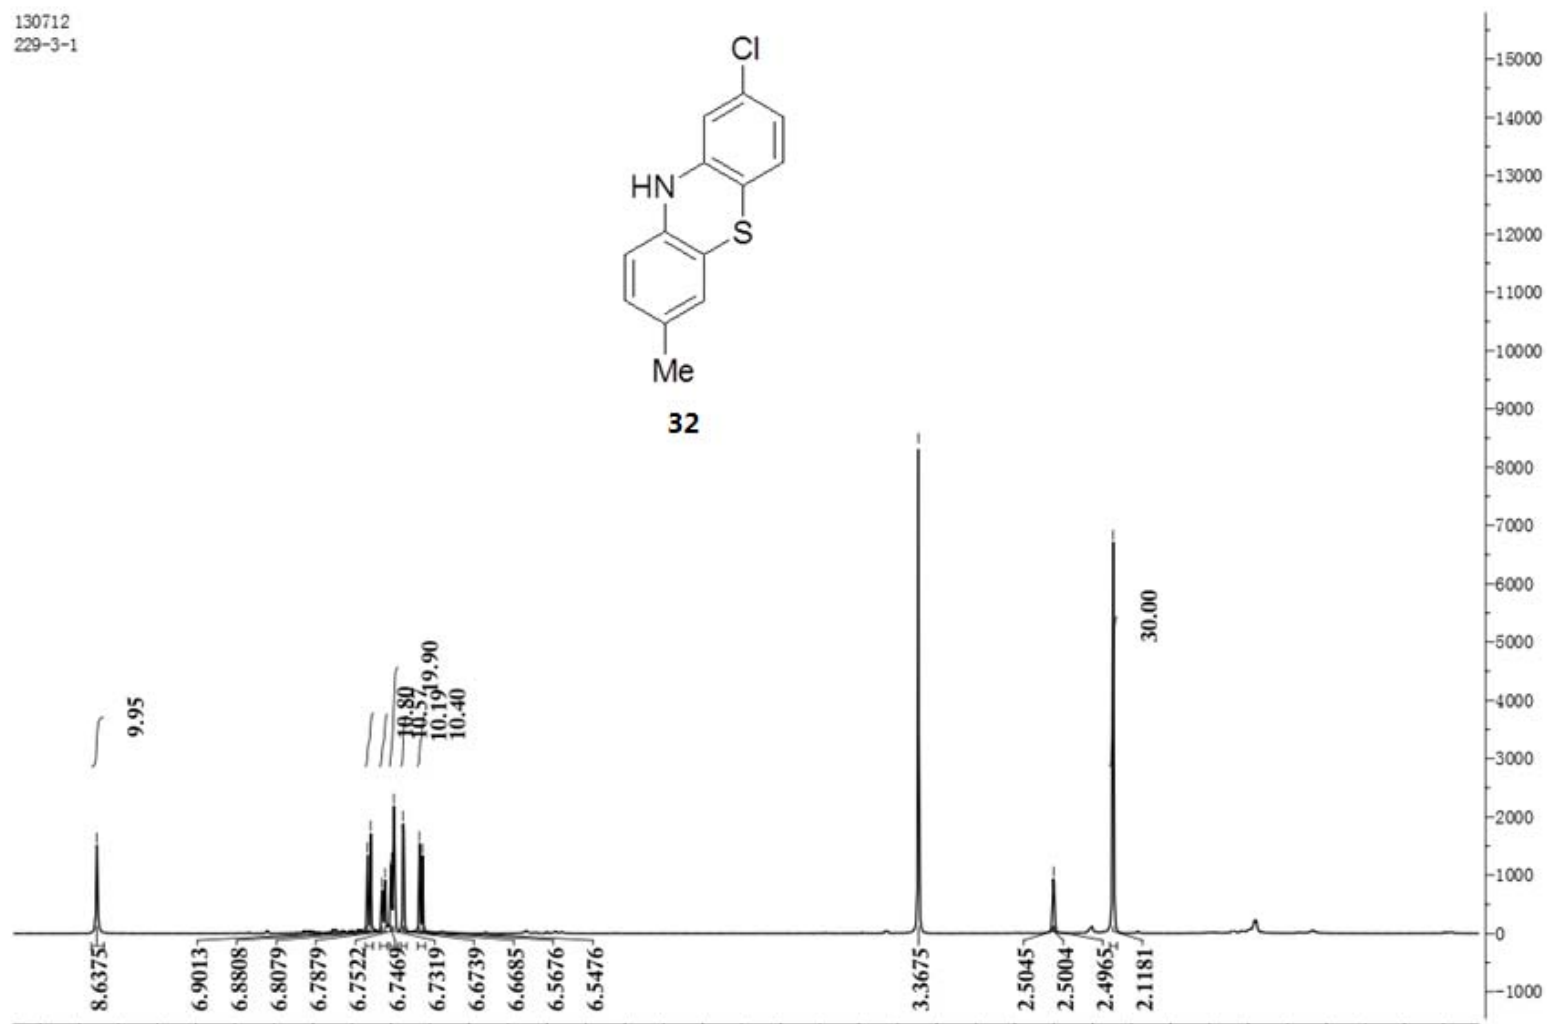

130712  
229-3-1C

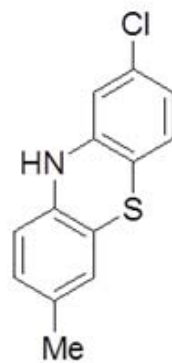

32

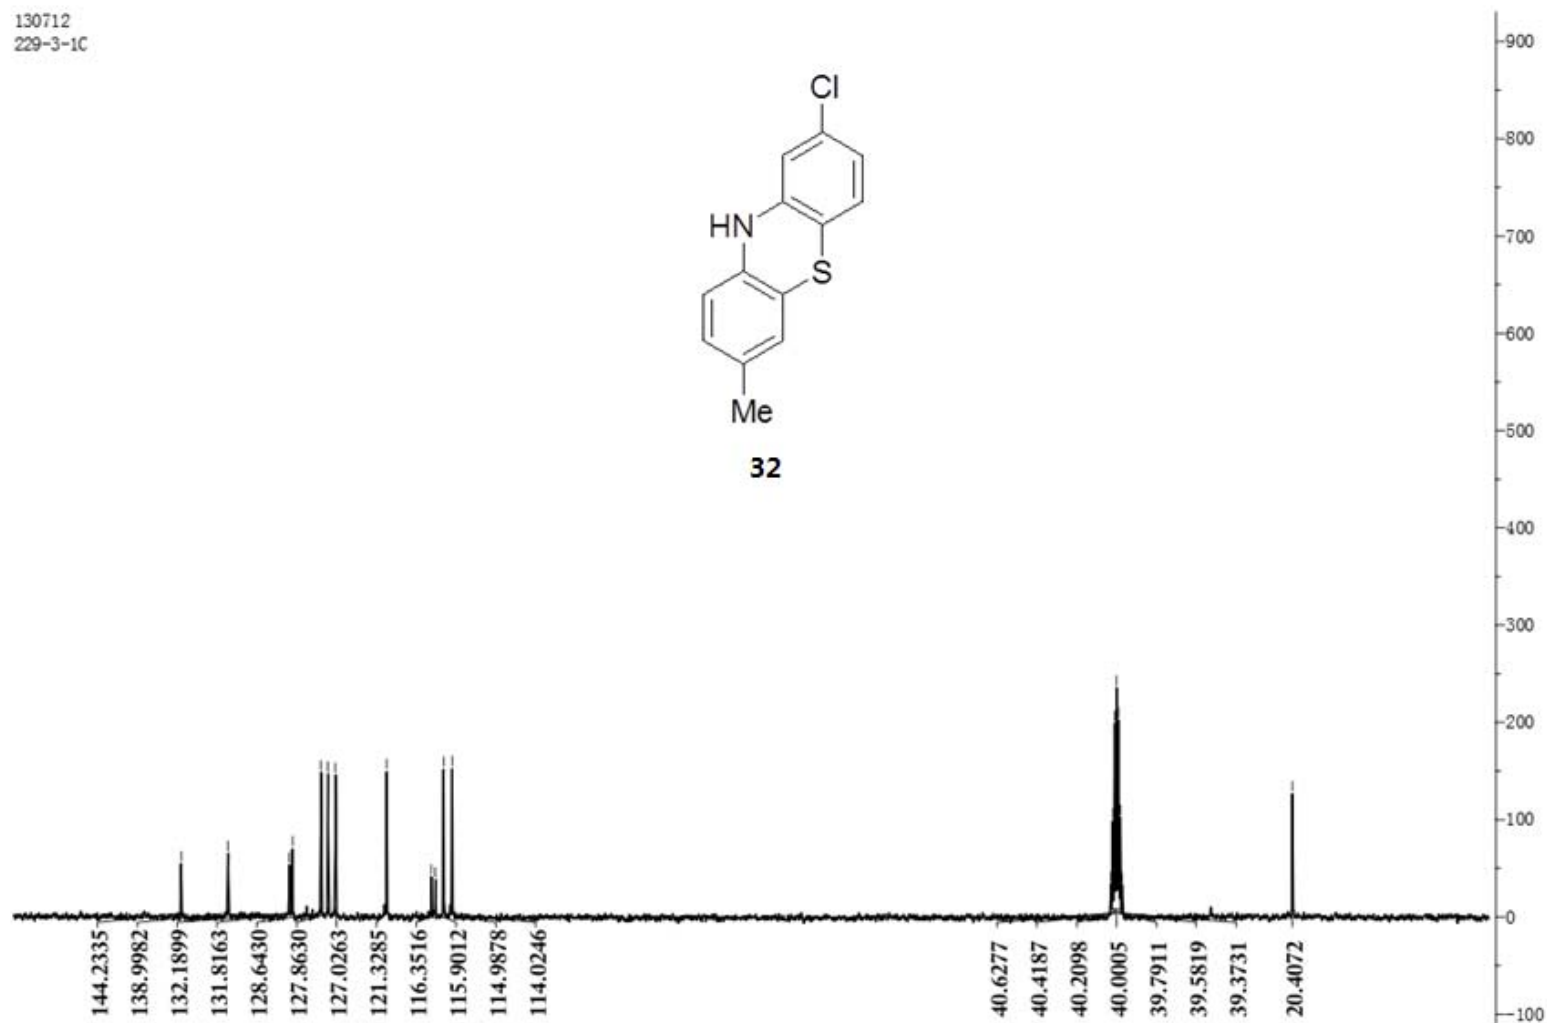

131026  
257-3-1

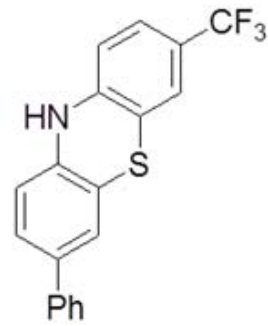

33

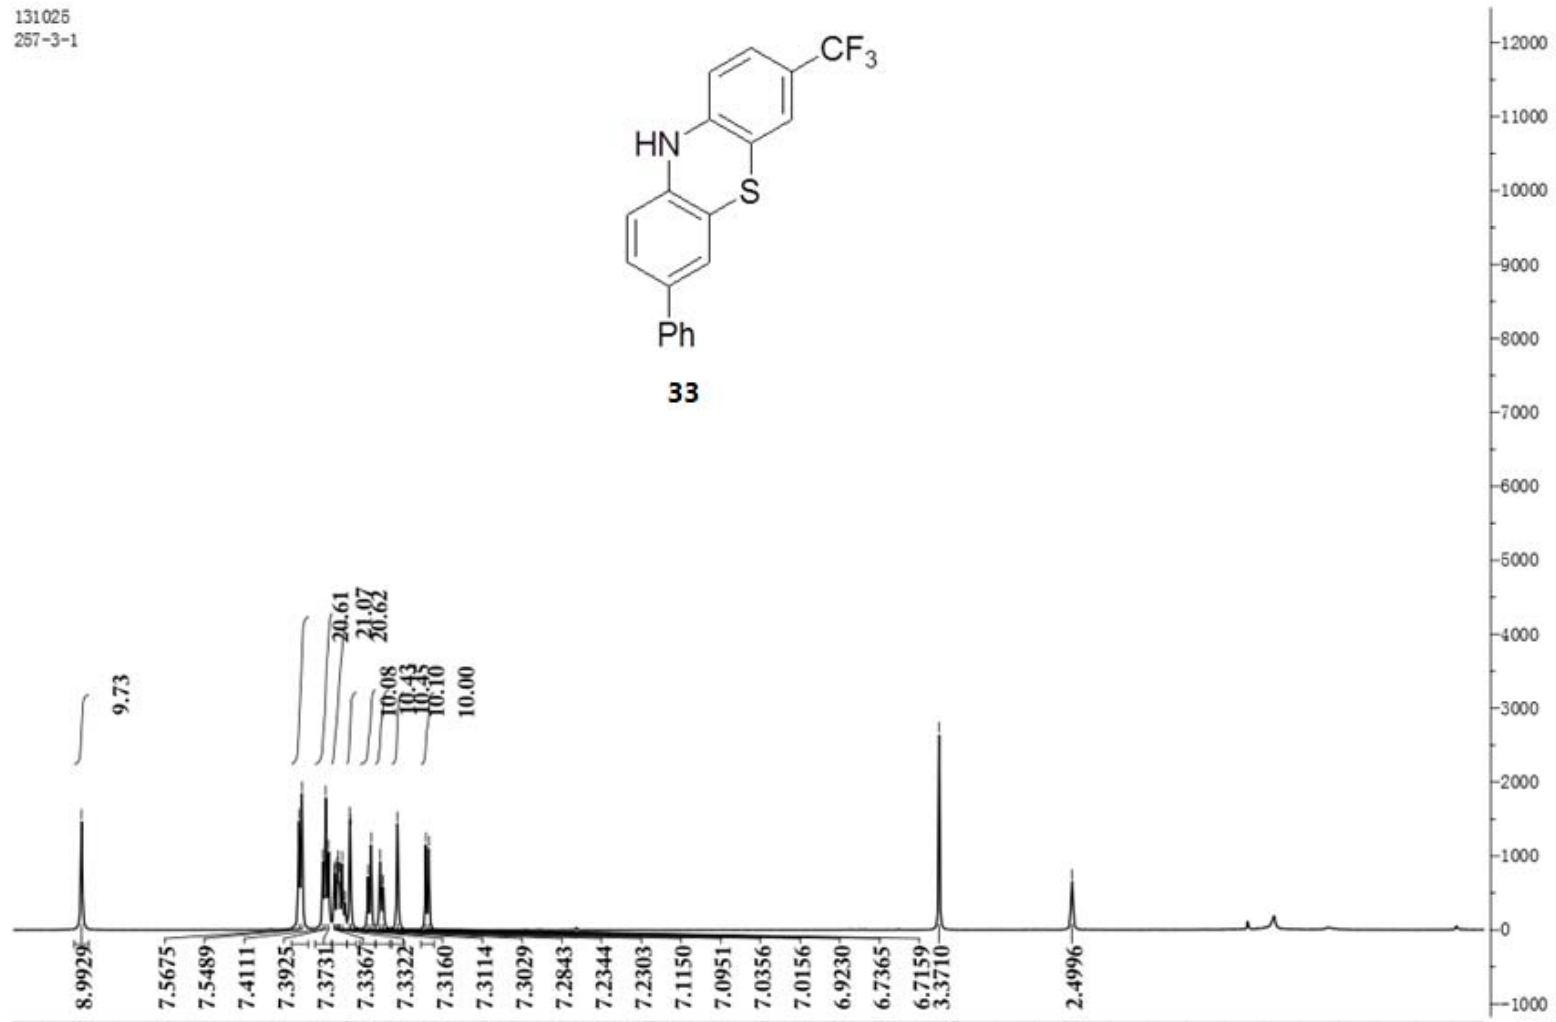

131025  
257-3-1C

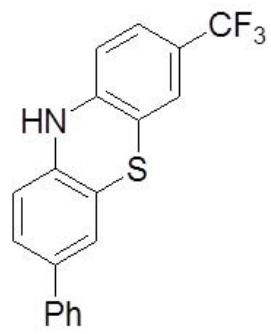

33

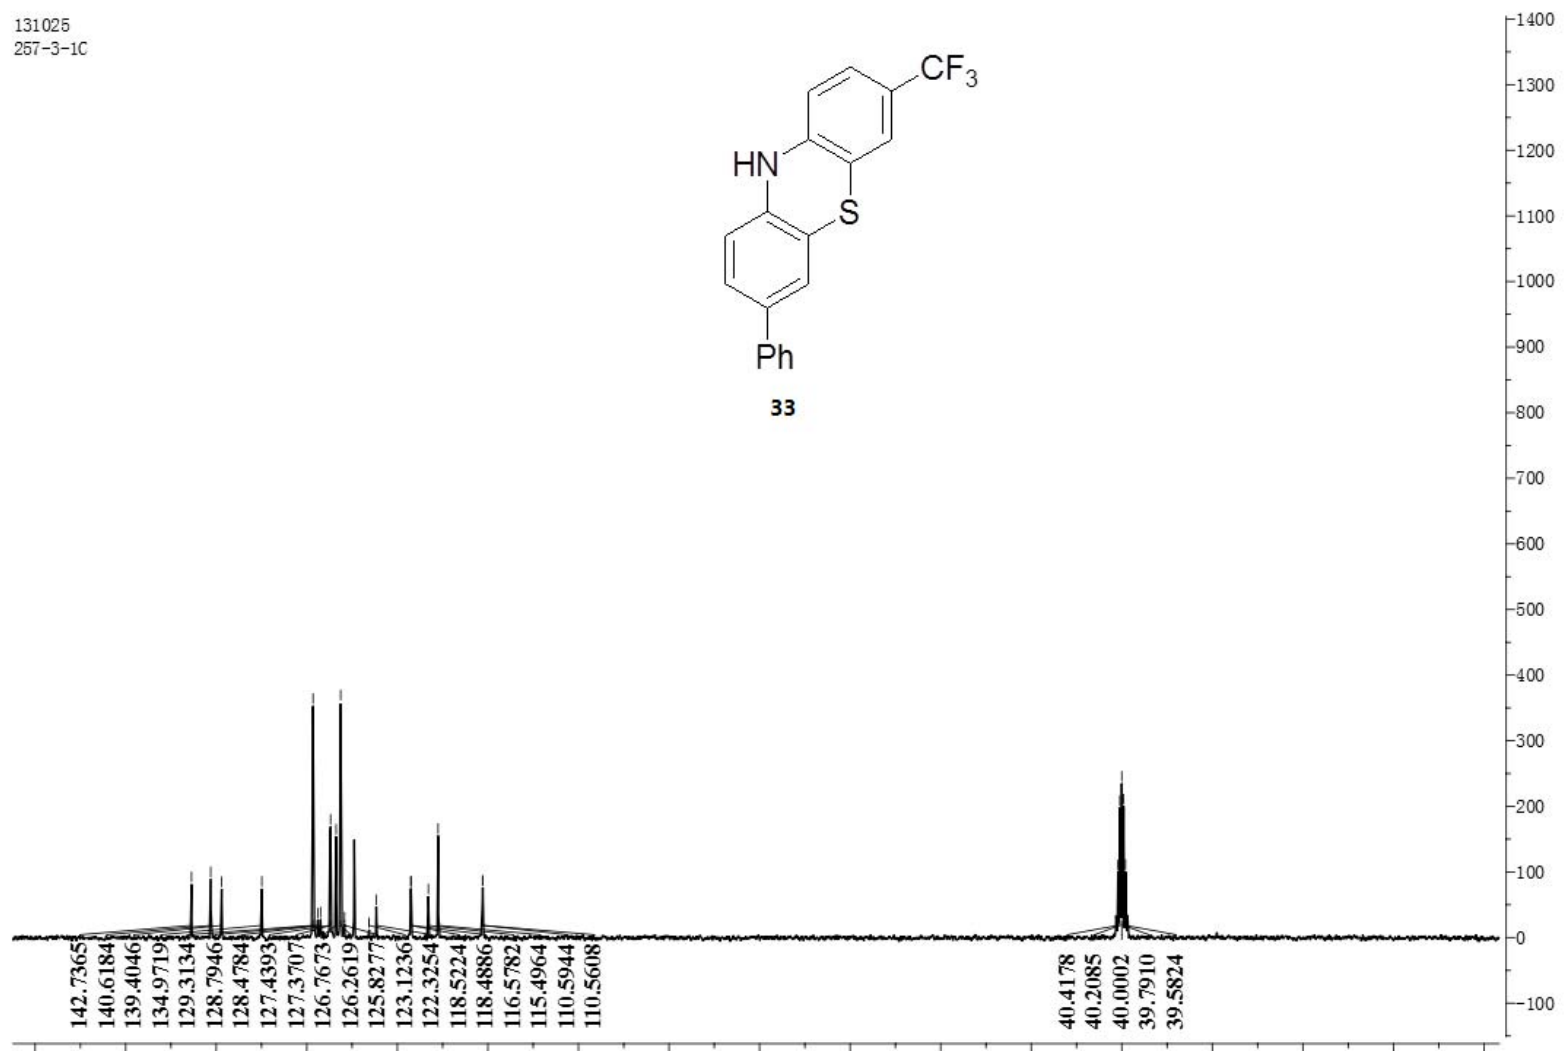

140311  
ym-1

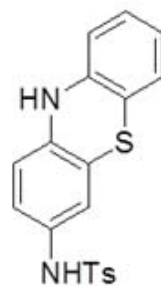

35

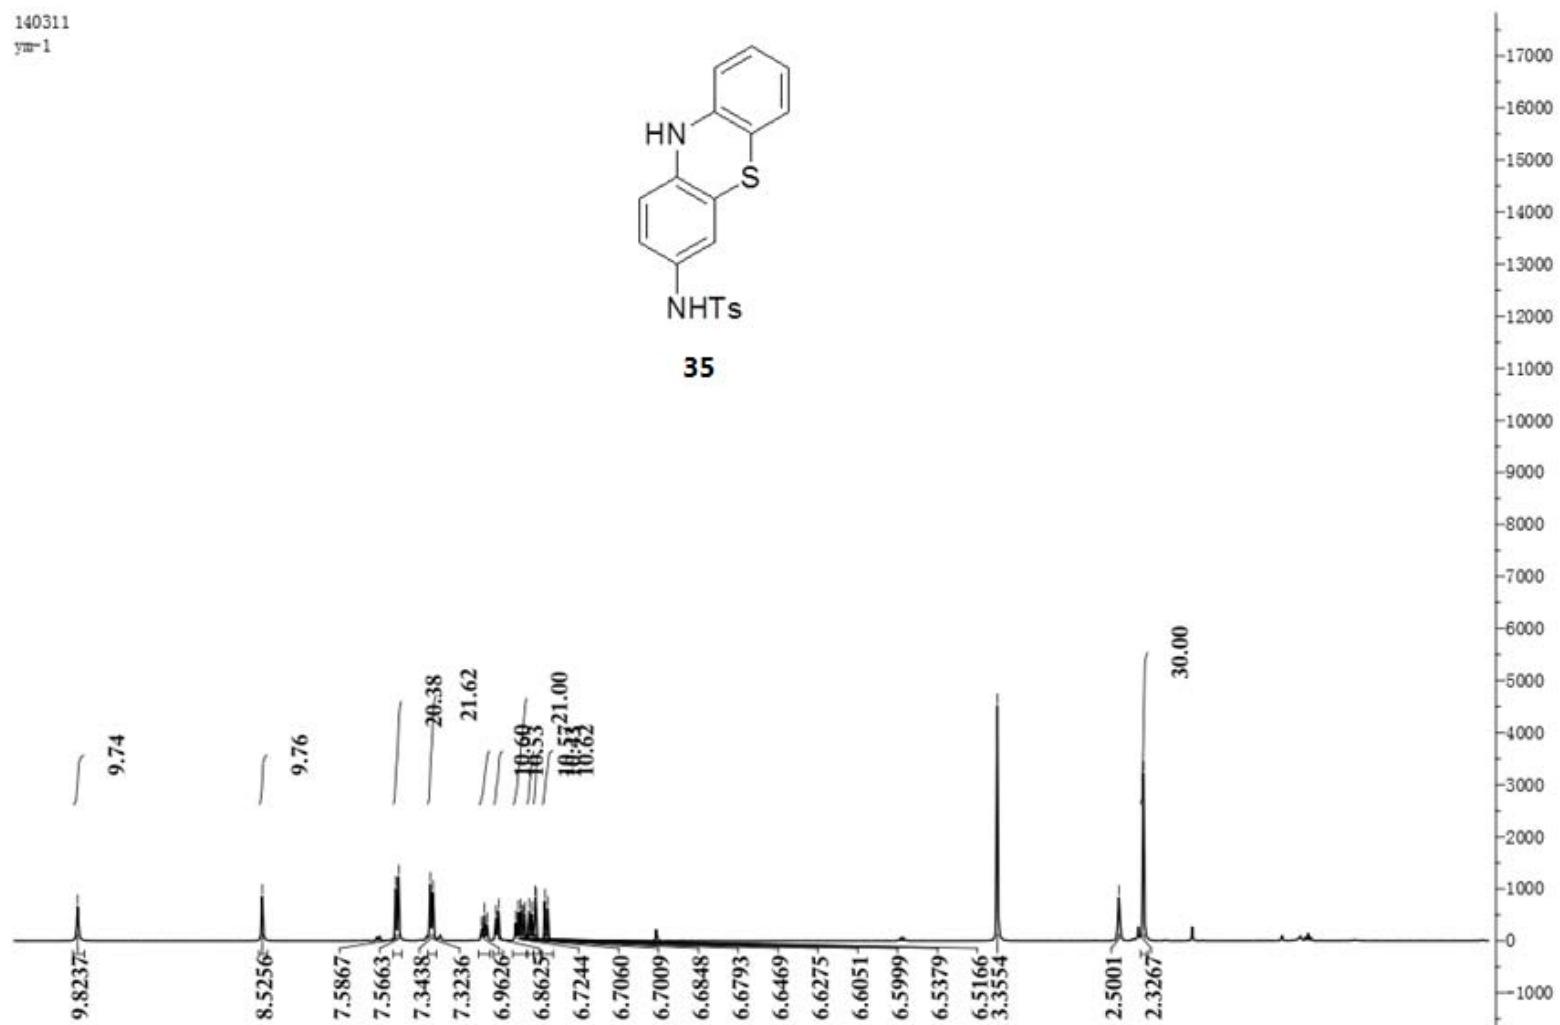

140311  
ym-1C

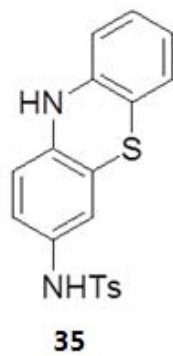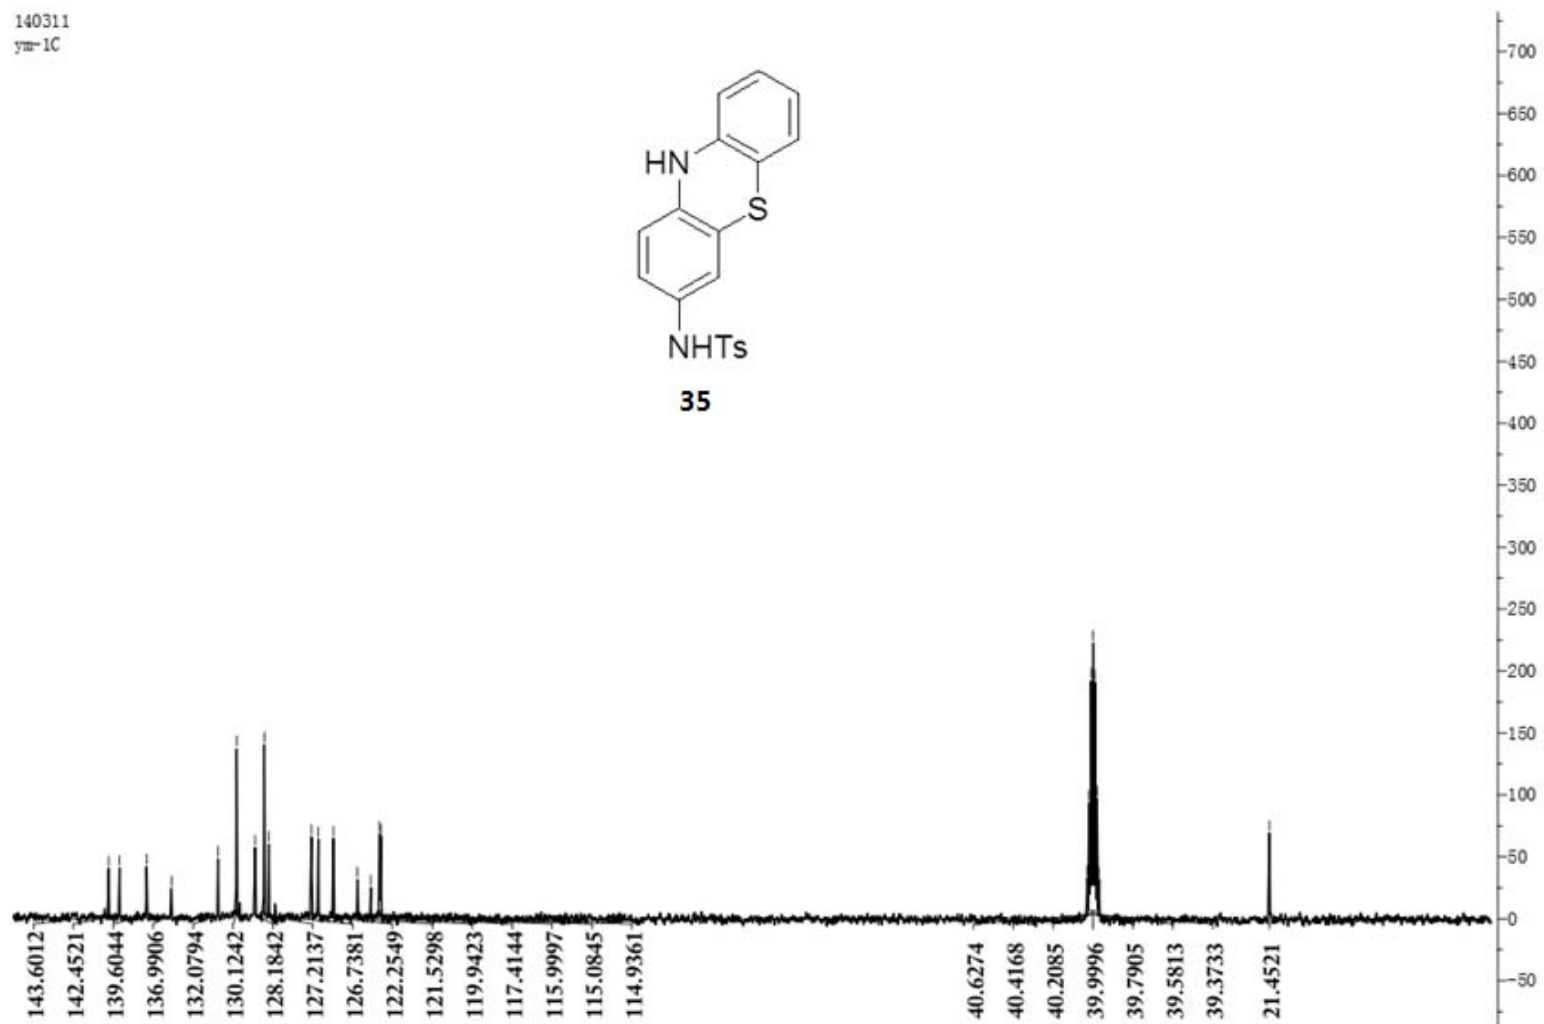

Supplement: c4qo00201f1.pdf [file c4qo00201f1.pdf]
